# Supplementary material for: Feasibility of a hyper-acute stroke unit model of care across England: a modelling analysis
Source: PubMed Central journal article supplement — BMJ Open. 2017 Dec 14;7(12):e018143. doi: 10.1136/bmjopen-2017-018143 (PMC5736033; doi:10.1136/bmjopen-2017-018143), 2017-12-14
Supplement: bmjopen-2017-018143.draft_revisions.pdf [file bmjopen-2017-018143.draft_revisions.pdf]

# BMJ Open

BMJ Open is committed to open peer review. As part of this commitment we make the peer review history of every article we publish publicly available.

When an article is published we post the peer reviewers' comments and the authors' responses online. We also post the versions of the paper that were used during peer review. These are the versions that the peer review comments apply to.

The versions of the paper that follow are the versions that were submitted during the peer review process. They are not the versions of record or the final published versions. They should not be cited or distributed as the published version of this manuscript.

BMJ Open is an open access journal and the full, final, typeset and author-corrected version of record of the manuscript is available on our site with no access controls, subscription charges or pay-per-view fees (<http://bmjopen.bmj.com>).

If you have any questions on BMJ Open's open peer review process please email [editorial.bmjopen@bmj.com](mailto:editorial.bmjopen@bmj.com)

# BMJ Open

## Centralising hyperacute stroke services in England: feasibility and compromises

|                                 |                                                                                                                                                                                                                                                                                                                                              |
|---------------------------------|----------------------------------------------------------------------------------------------------------------------------------------------------------------------------------------------------------------------------------------------------------------------------------------------------------------------------------------------|
| Journal:                        | <i>BMJ Open</i>                                                                                                                                                                                                                                                                                                                              |
| Manuscript ID                   | bmjopen-2017-018143                                                                                                                                                                                                                                                                                                                          |
| Article Type:                   | Research                                                                                                                                                                                                                                                                                                                                     |
| Date Submitted by the Author:   | 08-Jun-2017                                                                                                                                                                                                                                                                                                                                  |
| Complete List of Authors:       | Allen, Michael; University of Exeter Medical School<br>Pearn, Kerry; University of Exeter, Medical School<br>Villeneuve, Emma; University of Exeter, Medical School<br>Monks, T; University of Southampton Faculty of Health Sciences<br>Stein, Ken; University of Exeter, Medical School<br>James, Martin; Royal Devon and Exeter Hospital, |
| <b>Primary Subject Heading</b>: | Health services research                                                                                                                                                                                                                                                                                                                     |
| Secondary Subject Heading:      | Cardiovascular medicine                                                                                                                                                                                                                                                                                                                      |
| Keywords:                       | Stroke < NEUROLOGY, Organisation of health services < HEALTH SERVICES ADMINISTRATION & MANAGEMENT, Quality in health care < HEALTH SERVICES ADMINISTRATION & MANAGEMENT                                                                                                                                                                      |
|                                 |                                                                                                                                                                                                                                                                                                                                              |

SCHOLARONE™  
Manuscripts

# Centralising hyperacute stroke services in England: feasibility and compromises

Michael Allen\*, Kerry Pearn, Emma Villeneuve, Thomas Monks, Ken Stein, Martin James

Michael Allen, Honorary Research Fellow, University of Exeter Medical School, St Luke's Campus, Heavitree Road, EXETER, EX1 2LU, UK

Kerry Pearn, Associate Research Fellow, University of Exeter Medical School, St Luke's Campus, Heavitree Road, EXETER, EX1 2LU, UK

Emma Villeneuve, Associate Research Fellow, University of Exeter Medical School, St Luke's Campus, Heavitree Road, EXETER, EX1 2LU, UK

Thomas Monks, Senior Research Fellow, NIHR CLAHRC Wessex Methodological Hub, Room AA72 South Academic Block, Southampton General Hospital, SOUTHAMPTON, SO16 6YD

Ken Stein, Deputy Director of PenCLAHRC, University of Exeter Medical School, St Luke's Campus, Heavitree Road, EXETER, EX1 2LU, UK

Martin James, Consultant Stroke Physician, Royal Decon & Exeter NHS trust, Barrack Road, EXETER, EX2 5DW, UK

\*Correspondence to: [m.allen@exeter.ac.uk](mailto:m.allen@exeter.ac.uk)

The Corresponding Author has the right to grant on behalf of all authors and does grant on behalf of all authors, a worldwide licence to the Publishers and its licensees in perpetuity, in all forms, formats and media (whether known now or created in the future), to i) publish, reproduce, distribute, display and store the Contribution, ii) translate the Contribution into other languages, create adaptations, reprints, include within collections and create summaries, extracts and/or, abstracts of the Contribution, iii) create any other derivative work(s) based on the Contribution, iv) to exploit all subsidiary rights in the Contribution, v) the inclusion of electronic links from the Contribution to third party material where-ever it may be located; and, vi) licence any third party to do any or all of the above.

All authors have completed the ICMJE uniform disclosure form at [www.icmje.org/coi\\_disclosure.pdf](http://www.icmje.org/coi_disclosure.pdf) and declare: no support from any organisation for the submitted work; no financial relationships with any organisations that might have an interest in the submitted work in the previous three years; no other relationships or activities that could appear to have influenced the submitted work.

## Ethics

This study used aggregate patient counts only, obtained from HES. No individual patient-level data was sought, obtained or used in the study. No ethical approval was sought.

### Authorship & contributorship

Michael Allen is the lead author and guarantor, and proposed the key methodology to be used in the study. He also contributed to coding of the model.

Kerry Pearn wrote much of the code used in the model, and contributed to refining the basis of the modelling. She was involved in reviewing and editing the paper.

Emma Villeneuve developed the initial prototypes of the model employed, testing a number of heuristic approaches. She was involved in reviewing and editing the paper.

Thomas Monks framed the initial problem of balancing access to stroke care with developing a unit of sufficient size to maintain expertise, and recommended the modelling study contained herein<sup>1</sup>. He critiqued the methods used in this study, and was involved in reviewing and editing the paper.

Ken Stein oversaw all work. He was involved in framing the problem to be modelled<sup>1</sup>. He critiqued the methods used in this study, and was involved in reviewing and editing the paper.

Martin James is the clinical stroke consultant for the work and paper. He was involved in framing the problem to be modelled<sup>1</sup>. He advised on the clinical objectives of the study. was involved in authoring, reviewing and editing the paper.

1. Monks T, Pitt M, Stein K, et al. Hyperacute stroke care and NHS England's business plan. *BMJ* 2014;34

### Transparency

The lead author (Michael Allen) confirms that the manuscript is an honest, accurate, and transparent account of the study being reported; that no important aspects of the study have been omitted.

### Funding

This study was funded by the National Institute of Health Research (NIHR) Collaboration for Leadership in Applied Health Research and Care for the South West Peninsula. The views and opinions expressed in this paper are those of the authors, and not necessarily those of the NHS, the National Institute for Health Research, or the Department of Health.

### Data sharing

Full data and code used for this study is available at:

[https://github.com/MichaelAllen1966/stroke\\_unit\\_location](https://github.com/MichaelAllen1966/stroke_unit_location)

Included in the data and code are:

Counts of acute stroke admissions by LSOA

Estimated travel times from all LSOAs to all acute stroke units

Hospital information (name, location)

Full source code used to produce results reported here (which runs using open source software)

## Abstract

**Objectives:** The policy of centralising hyperacute stroke units (HASUs) in England aims to provide stroke care in units that are both large enough to sustain expertise (>600 admissions/year) and dispersed enough to rapidly deliver time-critical treatments (<30 minutes maximum travel time). Currently, just over half (56%) of stroke patients access care in such a unit. We sought to model national configurations of HASUs that would optimise both institutional size and geographical access to stroke care, to maximise the population benefit from the centralisation of stroke care.

**Design:** Modelling of the effect of the national reconfiguration of stroke services. Optimal solutions were identified using a heuristic genetic algorithm.

**Setting:** 127 acute stroke services in England, serving a population of 54 million people.

**Participants:** 238,887 emergency admissions with acute stroke over a 3-year period (2013-2015).

**Intervention:** Modelled reconfigurations of HASUs optimised for institutional size and geographical access.

**Main Outcome Measure:** Travel distances and times to HASUs, proportion of patients attending a HASU with at least 600 admissions per year, minimum and maximum HASU admissions.

**Results:** Solutions were identified with 75-85 HASUs with annual stroke admissions in the range 600-2,000, which achieve up to 82% of patients attending a stroke unit within 30 minutes estimated travel time (with at least 95% and 98% patients being within 45 and 60 minutes travel time respectively).

**Conclusions:** The reconfiguration of hyperacute stroke services in England could lead to all patients being treated in a HASU with between 600 and 2,000 admissions per year. However, the proportion of patients within 30 minutes of a HASU would fall from over 90% to 80-82%.

## Article summary

### Strengths and weaknesses

- The study described allows for a national view of the relationship between the number of acute stroke units (based on choosing from current locations of acute stroke units) in England and the dual goals of (1) having all patients attend a stroke unit with at least 600 acute confirmed stroke admissions per year, and (2) having patients within 30 minutes of an acute stroke unit.
- The study uses a genetic algorithm that is able to hunt for solutions when there are a vast range of possibilities.
- The study takes an objective approach with explicitly described objectives.
- A limitation of the study is that identified solutions do not take into account the complex local pressures and reasons for preferring one unit over another at the cost of the objectives used in identifying solutions in this study.

### Introduction

Stroke is a leading causes of death and disability worldwide, with an estimated 5.9 million deaths and 33 million stroke survivors in 2010[1]. In England, Wales and Northern Ireland 85,000 people are hospitalised with stroke each year[2], and stroke is ranked third as a cause of disability-adjusted life years in the UK over the last 25 years[3].

In recent years the NHS in England has sought to promote the reconfiguration of stroke services across the country, building on the evidence-based model developed in London[4]. Centralisation of stroke care in London has been shown to increase thrombolysis rates, reduce mortality, reduce length of stay, and reduce long-term costs to the NHS[5,6]. These benefits are considered to be due to patients being cared for by specialist stroke teams, facilitated by direct hospital admission to a large hyperacute stroke unit (HASU). Guidelines recommend a minimum number of admissions to a HASU of 600 patients per year, and NHS England reconfiguration guidelines also suggest 'travel time should be ideally 30 minutes but no more than 60 minutes[7,8]. Centralisation of acute stroke care in London was guided by a modelling exercise whereby sites were identified with no Londoner more than a 30 minute ambulance journey from the nearest HASU[5]. Time from onset to emergency hospital treatment is known to be especially critical for ischaemic stroke, when the effectiveness of thrombolysis declines rapidly in the first few hours after stroke[9]. More recently, mechanical thrombectomy has shown effectiveness in patients presenting up to 6 hours after stroke onset, with effectiveness still higher if treatment is given earlier[10].

With the critical importance of speed to treatment with thrombolysis or thrombectomy, it has nonetheless been questioned if the improvements in outcome that came with centralisation of stroke services in metropolitan areas could be replicated in more rural environments, with modelling being suggested as a first step at analysing the problem[11]. We therefore sought to investigate the potential for meeting the dual objectives of all patients with acute stroke being admitted to a HASU of sufficient size (at least 600 acute stroke patients per year) and that unit being within 30 minutes travel time.

### Methods

We included 238,887 patients coded with ischaemic or haemorrhagic stroke (ICD-10 I61, I63, I64) with an emergency admission over a three-year period (2013-2015). Stroke admission numbers were counts of admissions for each of 31,771 Lower Super Output Areas (LSOAs) in England. No individual patient level data was accessed: counts of admissions per LSOA were extracted from Hospital Episode Statistics (HES; <http://www.hscic.gov.uk/hes>) using the Lightfoot Signals from Noise tool

1  
2  
3 (<http://www.lightfootsolutions.com/>). Estimated fastest road travel times were obtained from a  
4 geographic information system (Maptitude, with MP-MileCharter add-in).

5  
6 We used a genetic algorithm based on NSGA-II[12] (see online appendix) to derive potential  
7 configurations of HASUs across England, balancing competing objectives. Solutions were eliminated  
8 if another solution was equally as good in all optimisation parameters and was better in at least one  
9 parameter. The selected configurations were based on a range of optimisation parameters (listed in  
10 the online appendix) which seek to minimise travel distances and to control admission numbers  
11 (admitting as many people to HASUs with at least 600 admissions per year while also seeking to  
12 control the maximum number of admissions to any hospital). Solutions retained are referred to as  
13 non-dominated solutions; together these form a 'Pareto front' where improved performance in one  
14 objective can only be at the expense of another.  
15  
16

## 17 Results

18  
19 When comparing predicted with actual admissions across the modelled configurations there was a  
20 median absolute error of 105 admissions per unit per year, or a relative absolute error of 17%.  
21 Prediction accuracy depended on proximity to a hospital's nearest neighbour, and was  
22 proportionately greater in urban areas where travel distance is less of a consideration. HASUs  
23 located close to other acutely admitting units have a poorer prediction accuracy than those located  
24 further from the nearest alternative acute stroke unit (figure 1).  
25

26  
27 With an increasing number of HASUs, average and maximum road travel times reduce (figure 2),  
28 following the law of 'diminishing returns'. For example, with 24 units (the number of neurosciences  
29 centres in England) the lowest average travel time is 34 minutes. As the number of HASUs is  
30 increased to 50, 75 and 100, the best average travel times found are 26, 22 and 19 minutes  
31 respectively. The best maximum travel time found are 109, 99, 78 and 78 minutes with 25, 50, 75  
32 and 100 HASUs. Average and maximum travel times for the identified solutions depend on what  
33 other factors are prioritised in the model. For example, with 25 HASUs, average travel distances in  
34 different configurations (all of which are non-dominated solutions) range from 34 to 62 minutes, and  
35 maximum travel time range from 109 to 378 minutes.  
36

37  
38 As the number of HASUs increases, both the maximum and minimum number of admissions to any  
39 single hospital in the configuration reduces (figure 3). For example, with 25 units the lowest possible  
40 maximum number of admissions to any single unit is 4,381 admissions per year. With 50, 75 and 100  
41 units the largest hospital has admissions of 2,493, 1,829 and 1,687 patients per year. These results  
42 represent the best compromise between unit size and distance if no other factors are regarded as  
43 important. To achieve all admissions attending a HASU with at least 600 admissions per year the  
44 maximum number of hospitals is 85, by which point 82% of the population is within 30 minutes  
45 travel (with 95% and 98% being within 45 and 60 minutes, and the maximum travel time is 99  
46 minutes).  
47

48  
49 As the number of HASUs increases, the proportion of patients within 30 minutes travel increases  
50 (figure 4), to a maximum of 90% (the best possible proportions with 25, 50, 75 and 100 units were  
51 52%, 70%, 84% and 88%). At the same time, increasing the number of HASUs reduces the number of  
52 patients attending a unit with at least 600 admissions per year (figure 4). Increasing the number of  
53 units lead first to an increase in the proportion of patients attending a unit of sufficient size within  
54 30 minutes travel, but when increased further a reduction in this proportion is seen (figure 4). The  
55 maximum proportion of patients attending a unit admitting 600 patients per year within 30 minutes  
56 travel is 82%. Solutions with at least 80% of patients being within 30 minutes of a HASU admitting at  
57  
58  
59  
60

1  
2  
3 least 600 patients per year have between 75 and 95 HASUs. If target maximum travel time is  
4 extended to 45 minutes then the maximum proportion of patients attending a HASU of sufficient  
5 size is 95%, with this maximum occurring with between 65 and 90 units.  
6

7 In each configuration it may be important to control the maximum number of admissions to any  
8 single unit. Configurations of between 75 and 85 HASUs were identified with all patients attending a  
9 unit admitting 600 patients per year, at least 80% of patients within 30 minutes travel and maximum  
10 admissions to any single HASU of no greater than 2,000. The algorithm identified 140 configurations  
11 in which annual admissions were kept within 600-2,500, at least 80% of patients were within 30  
12 minutes of their closest HASU, and at least 95% and 98% of patients were with 45 and 60 minutes of  
13 their closest unit.  
14

## 15 16 17 18 Discussion

19 Our modelling of national configurations of HASUs, designed to replicate the population benefits  
20 from centralisation of acute stroke services, has shown the feasibility but also the compromises  
21 necessary to maximise these benefits. Currently just over half (56%) of patients with acute stroke are  
22 admitted to a stroke unit with at least 600 admissions per year[2], and NHS England proposes to  
23 increase this proportion through centralisation in fewer, larger units[13]. By reducing from the  
24 current 127 sites to between 75-85 centres, our centralised HASU model predicts it is possible for all  
25 stroke patients to attend a unit of sufficient size, but with a reduction in the proportion of patients  
26 within 30 minutes travel from the current 90% to 80-82%, and with 97% and 99% of patients within  
27 45 and 60 minutes travel respectively.  
28  
29

30 Maximising the number of patients attending a HASU with 600 stroke admissions per year is not an  
31 end in itself. The figure is an approximation for the size of a HASU able to develop and sustain  
32 expertise in stroke care[8], and overcome identified barriers to improved care such as  
33 thrombolysis[14-16]. An association has been observed between door-to-needle time for  
34 thrombolysis and institutional size[17,18]. Patients admitted to HASUs in areas that have  
35 undergone centralisation were found to be more likely to receive other important clinical  
36 interventions such as brain scanning and direct admission to a stroke unit sooner[19]. Centralisation  
37 to 75-85 hospitals in the manner we have described could therefore be expected to provide a  
38 significant benefit to the majority of patients. To yield these benefits, the large majority of patients  
39 will travel only moderately further (if at all) to reach a HASU. The disbenefits are to approximately  
40 2% of the population who would be more than 60 minutes away from a reconfigured HASU, and to  
41 the 2% of patients who are currently within 30 minutes of an existing centre but who, with  
42 centralisation, will travel more than 45 minutes to their nearest HASU. Consideration is therefore  
43 needed of how the disbenefits for these patients might be mitigated. Increased travel times might  
44 offset by targeted stroke awareness campaigns (which have been shown to enhance patient  
45 response to suspected stroke[20]) leading to earlier contact of emergency services. Increased travel  
46 time may also be offset by reduced door-to-treatment time in the HASU[17,21]. More radical  
47 solutions for isolated areas include mobile diagnosis and treatment [22]. Early diagnostic access  
48 and intravenous thrombolysis is a particular issue given the paucity of geographical coverage of  
49 mechanical thrombectomy in the UK, which promotes a model of 'drip-and-ship' (near-patient  
50 thrombolysis followed by immediate transfer to a more distant thrombectomy centre); currently  
51 only 75% of the English population is within 45 minutes travel time of one of the current 24  
52 neurosciences centres, where the expertise in this procedure is exclusively concentrated. All of these  
53 impacts from reconfiguration are not uniformly distributed, but fall disproportionately on more rural  
54  
55  
56  
57  
58  
59  
60



1  
2  
3 populations, and the existing evidence base from predominantly metropolitan  
4 reconfigurations[5,23] • does not allow a precise estimate of the trade-offs at hand when balancing  
5 locality against institutional size – a limitation that will hamper professional and public debate  
6 regarding the benefits and consequences of large service reorganisations.  
7

8 In constructing our model, we have assumed all patients will be taken to their closest HASU. If this is  
9 not the case (such as decisions being made instead on organisational boundaries) then some  
10 inaccuracy of the model around those boundaries is expected. This will be especially true in areas  
11 that have more than one HASU in close proximity; in such cases choice of destination may be  
12 influenced by factors (such as institutional reputation) other than shortest travel time. With  
13 increasing centralisation inaccuracies due to the proximity of units will reduce, as fewer patients will  
14 be on the boundary where travel time is not the only influence on the destination. Though we have  
15 incorporated the size of HASU into the algorithm, we have also sought to avoid infeasibly large units  
16 (those with more than 2,500 stroke admissions/year), particularly as such an arrangement involves  
17 large numbers of stroke-like presentations ('stroke mimics') also being conveyed to a HASU – such  
18 mimics represent as much as an additional 32% of admissions[24] • . Centralisation therefore raises  
19 significant issues around the capacity of receiving HASUs, both in infrastructure and workforce.  
20 Continued capacity at any HASU will depend on the efficient repatriation to locally-based post-acute  
21 and rehabilitation services (e.g. after the first 48-72 hours of care), and we have not modelled these  
22 effects or their vulnerability in this paper. There is also uncertainty around the recommended target  
23 of 600 admissions per year, not least as random variation would be expected to vary this figure  
24 between 550-650 (based on a Poisson distribution). With an ageing population, however, we  
25 anticipate a steady increase in admissions to hospital with disabling stroke despite better  
26 preventative care, particularly in stroke related to atrial fibrillation[25] •

27  
28  
29  
30  
31 Care should always be taken when considering what appear to be mathematically 'optimal'  
32 solutions. A model of this size identifies many solutions that have very similar performance, with  
33 only marginal differences between them. Our results are therefore best interpreted as showing the  
34 broad number of HASUs that are needed on a national or regional scale to deliver the maximum  
35 benefit from centralisation, and what impact this is likely to have on a significant minority of  
36 patients. Multiple objective optimisation location problems rarely if ever have a single explicit  
37 solution, and can illuminate but not dictate regional planning which is still best conducted on a  
38 smaller scale, incorporating other local knowledge. Nonetheless, national-level analysis can provide  
39 an insight into the range of optimal distributions of stroke centres across England. The national  
40 algorithm has identified many possible configurations in which annual admissions to any HASU are  
41 within the range 600-2,500 and with at least 80% of patients within 30 minutes of their closest  
42 HASU. Choosing between approximately similar options will require other considerations to be taken  
43 into account, and this is best performed at a regional level – although not at the relatively small  
44 'footprint' of many of NHS England's 44 Sustainability and Transformation Plans (STPs), the current  
45 geographical unit of planning.  
46  
47  
48

49 Acute stroke care is evolving, and the development of mechanical thrombectomy for acute large  
50 artery stroke is likely to create an imperative for still greater centralisation of services[10] • . The  
51 geographical issues we have identified here will act as an even greater influence on service planning  
52 for such specialised treatment, with a similar or more pronounced differential effect between urban  
53 and rural environments – removing, for example, the rationale for any metropolitan HASU that is not  
54 also capable of delivering mechanical thrombectomy. Further modelling work should be focussed on  
55 how best to organise care across England when still greater centralisation of some services are  
56 required for a significant proportion of patients.  
57  
58  
59  
60

## Conclusions

A policy of centralising acute stroke services across England in 75-85 HASUs could realistically achieve 80-85% of patients attending an acute unit of sufficient size within 30 minutes travel time (with 97% and 99% being within 45 and 60 minutes travel respectively), and with no unit larger than 2,500 stroke admissions per year. Though centralisation could offer significant advantages to the large majority of patients, a small minority (2-4% of the population) would be significantly adversely affected by centralisation, and planning for this minority will inevitably involve compromise between the recommended ideal institutional size and travel times.

For peer review only

## What is known already, and what this study adds

### What is known already?

NHS England's policy for the centralisation of acute stroke care is based on observational evidence of the mortality benefits from such centralised services, and recommends that all patients should attend a hyperacute stroke unit that both admits at least 600 acute stroke patients per year and is within 30 minutes travel time. Currently just over half (55%) of patients in England receive care at a HASU fulfilling both these conditions.

### What this study adds

Applying a multi-objective genetic algorithm approach, we predict that centralising acute stroke services across England in 75-85 HASUs (from the present 127 stroke centres) could realistically achieve all patients attending a stroke unit which has at least 600 acute stroke admissions per year, with 82%, 97% and 99% patients being within 30, 45 and 60 minutes travel respectively. The disbenefit to a significant rural minority is that approximately 7% of patients will move out of a 30 minute travel distance, and an additional 0.7% of patients move out of a 60 minute travel distance.

## Acknowledgements

This study was funded by the National Institute of Health Research (NIHR) Collaboration for Leadership in Applied Health Research and Care for the South West Peninsula. The views and opinions expressed in this paper are those of the authors, and not necessarily those of the NHS, the National Institute for Health Research, or the Department of Health.

## References

- 1 Feigin VL, Forouzanfar MH, Krishnamurthi R, *et al.* Global and regional burden of stroke during 1990-2010: Findings from the Global Burden of Disease Study 2010. *Lancet* 2014;**383**:245–55. doi:10.1016/S0140-6736(13)61953-4
- 2 Sentinel Stroke Audit Programme (SSNAP). Apr2015Mar2016-AnnualResultsPortfolio. Natl. Results April 2015-Mar 2016 <https://www.strokeaudit.org/Documents/Results/National/Apr2015Mar2016/Apr2015Mar2016-AnnualResultsPortfolio.aspx>. 2016.
- 3 Newton JN, Briggs ADM, Murray CJL, *et al.* Changes in health in England, with analysis by English regions and areas of deprivation, 1990-2013: A systematic analysis for the Global Burden of Disease Study 2013. *Lancet* 2015;**386**:2257–74. doi:10.1016/S0140-6736(15)00195-6
- 4 NHS England. Putting Patients First. NHS England's business plan 2014/15–2016/17. <https://www.england.nhs.uk/wp-content/uploads/2014/04/ppf-1415-1617-wa.pdf> 2014.
- 5 Morris S, Hunter RM, Ramsay AIG, *et al.* Impact of centralising acute stroke services in English metropolitan areas on mortality and length of hospital stay: difference-in-differences analysis. *BMJ* 2014;**349**:g4757. doi:10.1136/bmj.g4757
- 6 Hunter RM, Davie C, Rudd A, *et al.* Impact on Clinical and Cost Outcomes of a Centralized Approach to Acute Stroke Care in London: A Comparative Effectiveness Before and After Model. *PLoS One* 2013;**8**:1–9. doi:10.1371/journal.pone.0070420
- 7 Price C, James M. Meeting the Future Challenge of Stroke Meeting the Future Challenge of Stroke. Br. Assoc. Stroke Physicians. 2011. [www.basp.ac.uk](http://www.basp.ac.uk)
- 8 NHS England. Stroke Services: Configuration Decision Support Guide ([www.eoescn.nhs.uk/index.php/download\\_file/force/2069/168/](http://www.eoescn.nhs.uk/index.php/download_file/force/2069/168/)). 2015.
- 9 Emberson J, Lees KR, Lyden P, *et al.* Effect of treatment delay, age, and stroke severity on the effects of intravenous thrombolysis with alteplase for acute ischaemic stroke: A meta-analysis of individual patient data from randomised trials. *Lancet* 2014;**384**:1929–35. doi:10.1016/S0140-6736(14)60584-5
- 10 Goyal M, Menon BK, Van Zwam WH, *et al.* Endovascular thrombectomy after large-vessel ischaemic stroke: A meta-analysis of individual patient data from five randomised trials. *Lancet* 2016;**387**:1723–31. doi:10.1016/S0140-6736(16)00163-X
- 11 Monks T, Pitt M, Stein K, *et al.* Hyperacute stroke care and NHS England's business plan. *BMJ* 2014;**348**:g3049. doi:10.1136/bmj.g3049
- 12 Deb K, Pratap A, Agarwal S, *et al.* A fast and elitist multiobjective genetic algorithm: NSGA-II. *IEEE Trans Evol Comput* 2002;**6**:182–97. doi:10.1109/4235.996017

- 1  
2  
3 13 NHS England. NHS England Business Plan 2016/17.  
4 2016.<https://www.england.nhs.uk/wp-content/uploads/2016/03/bus-plan-16.pdf>  
5  
6 14 Eissa A, Krass I, Bajorek B V. Barriers to the utilization of thrombolysis for acute  
7 ischaemic stroke. *J Clin Pharm Ther* 2012;**37**:399–409.  
8 doi:<http://dx.doi.org/10.1111/j.1365-2710.2011.01329.x>  
9  
10 15 Carter-Jones CR. Stroke thrombolysis: Barriers to implementation. *Int. Emerg. Nurs.*  
11 2011;**19**:53–7. doi:10.1016/j.ienj.2010.02.005  
12  
13 16 Monks T, Pitt M, Stein K, *et al.* Maximizing the population benefit from thrombolysis  
14 in acute ischemic stroke: A modeling study of in-hospital delays. *Stroke*  
15 2012;**43**:2706–11. doi:10.1161/STROKEAHA.112.663187  
16  
17 17 Bray BD, Campbell J, Cloud GC, *et al.* Bigger, faster?: Associations between hospital  
18 thrombolysis volume and speed of thrombolysis administration in acute ischemic  
19 stroke. *Stroke* 2013;**44**:3129–35. doi:10.1161/STROKEAHA.113.001981  
20  
21 18 Strbian D, Ahmed N, Wahlgren N, *et al.* Trends in Door-to-Thrombolysis Time in the  
22 Safe Implementation of Stroke Thrombolysis Registry. *Stroke* 2015;**46**:1275–80.  
23 doi:10.1161/STROKEAHA.114.007170  
24  
25 19 Ramsay AIG, Morris S, Hoffman A, *et al.* Effects of centralizing acute stroke services  
26 on stroke care provision in two large metropolitan areas in England. *Stroke*  
27 2015;**46**:2244–51. doi:10.1161/STROKEAHA.115.009723  
28  
29 20 Mellon L, Doyle F, Rohde D, *et al.* Stroke warning campaigns: delivering better  
30 patient outcomes? A systematic review. *Patient Relat Outcome Meas* 2015;**6**:61–73.  
31 doi:10.2147/PROM.S54087  
32  
33 21 Meretoja A, Strbian D, Mustanoja S, *et al.* Reducing in-hospital delay to 20 minutes in  
34 stroke thrombolysis. *Neurology* 2012;**79**:306–13.  
35 doi:10.1212/WNL.0b013e31825d6011  
36  
37 22 Kunz A, Ebinger M, Geisler F, *et al.* Functional outcomes of pre-hospital thrombolysis  
38 in a mobile stroke treatment unit compared with conventional care: an observational  
39 registry study. *Lancet Neurol* 2016;**15**:1035–43. doi:10.1016/S1474-4422(16)30129-6  
40  
41 23 Fulop N, Boaden R, Hunter R, *et al.* Innovations in major system reconfiguration in  
42 England: a study of the effectiveness, acceptability and processes of implementation of  
43 two models of stroke care. *Implement Sci* 2013;**8**:5. doi:10.1186/1748-5908-8-5  
44  
45 24 Dawson A, Cloud GC, Pereira AC, *et al.* Stroke mimic diagnoses presenting to a  
46 hyperacute Stroke unit. *Clin Med J R Coll Physicians London* 2016;**16**:423–6.  
47 doi:10.7861/clinmedicine.16-5-423  
48  
49 25 Yiin GSC, Howard DPJ, Paul NLM, *et al.* Recent time trends in incidence, outcome  
50 and premorbid treatment of atrial fibrillation-related stroke and other embolic vascular  
51  
52  
53  
54  
55  
56  
57  
58  
59  
60

1  
2  
3 events: a population-based study. *J Neurol Neurosurg Psychiatry* 2015;:1-7.  
4 doi:10.1136/jnnp-2015-311947  
5  
6  
7  
8  
9  
10  
11  
12  
13  
14  
15  
16  
17  
18  
19  
20  
21  
22  
23  
24  
25  
26  
27  
28  
29  
30  
31  
32  
33  
34  
35  
36  
37  
38  
39  
40  
41  
42  
43  
44  
45  
46  
47  
48  
49  
50  
51  
52  
53  
54  
55  
56  
57  
58  
59  
60

For peer review only

## Figure legends

Figure 1. Error in predicting admissions (as recorded in SSNAP) grouped by proximity to the closest neighbouring acute stroke unit (10 minute bins). Points show median with error bars indicating inter-quartile range. The left panel shows the absolute error in predicting admission numbers per year, the right panel shows the absolute error as a percentage of actual admissions for each unit.

Figure 2. The effect of changing the number of acute stroke units on average and maximum travel times. The left panel shows the best average and maximum travel times achieved by the algorithm. The middle panel shows average travel times. The bold line represents the best result identified in any scenario. The dotted line shows the worst result identified for a non-dominated solution. The shaded area represents the effective region of trade-off between average travel time and other optimisation parameters. The right panel repeats these results for maximum travel time.

Figure 3 The effect of changing the number of acute stroke units on minimum and maximum admissions to any single unit. The left panel shows the best admissions identified by the algorithm (it is better to have a higher minimum number of admissions and lower maximum admissions; that is the smallest hospital should be as large as possible, and the largest hospital as small as possible). The middle panel shows minimum admission numbers (to the smallest unit in each scenario). The bold line represents the best result identified in any scenario. The dotted line shows the worst result identified for a non-dominated solution. The shaded area represents the effective region of trade-off between average minimum admissions and other optimisation parameters. The right panel repeats these results for maximum admissions in a scenario.

Figure 4 The effect of changing the number of acute stroke units on the proportion of patients attending a unit with 600 admissions per year, the proportion of patients attending a unit within 30 minutes of home location and the proportion of patients attending a unit with 600 admissions per year and within 30 minutes of home location. The top left panel shows the best solutions for each identified by the algorithms. The top right panels shows the proportion of patients attending a unit with 600 admissions per year. The bold line represents the best result identified in any scenario. The dotted line shows the worst result identified for a non-dominated solution. The shaded area represents the effective region of trade-off between attending a unit with target admission numbers and other optimisation parameters. The bottom two panels repeat the analysis for the proportion of patients attending a unit within 30 minutes of home location and the proportion of patients attending a unit with 600 admissions per year and within 30 minutes of home location.

1  
2  
3  
4  
5  
6  
7  
8  
9  
10  
11  
12  
13  
14  
15  
16  
17  
18  
19  
20  
21  
22  
23  
24  
25  
26  
27  
28  
29  
30  
31  
32  
33  
34  
35  
36  
37  
38  
39  
40  
41  
42  
43  
44  
45  
46  
47  
48  
49  
50  
51  
52  
53  
54  
55  
56  
57  
58  
59  
60

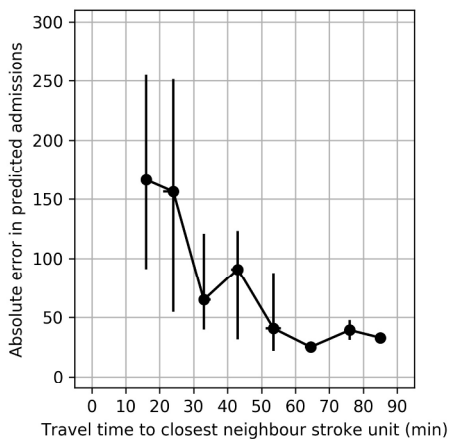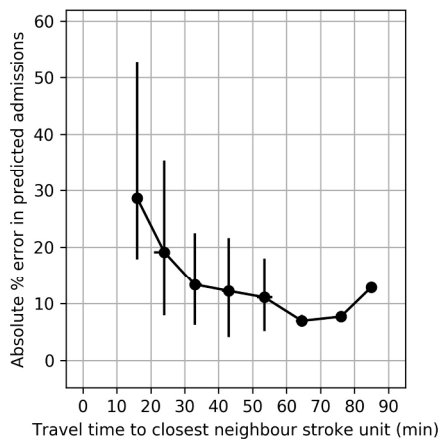

899x476mm (72 x 72 DPI)

review only



1  
2  
3  
4  
5  
6  
7  
8  
9  
10  
11  
12  
13  
14  
15  
16  
17  
18  
19  
20  
21  
22  
23  
24  
25  
26  
27  
28  
29  
30  
31  
32  
33  
34  
35  
36  
37  
38  
39  
40  
41  
42  
43  
44  
45  
46  
47  
48  
49  
50  
51  
52  
53  
54  
55  
56  
57  
58  
59  
60

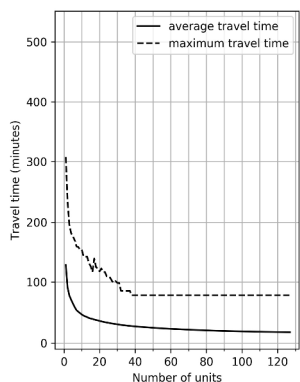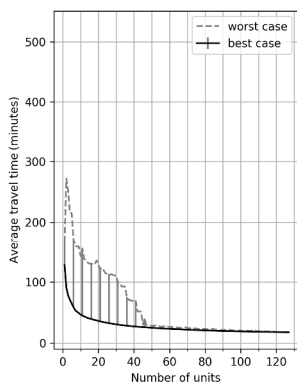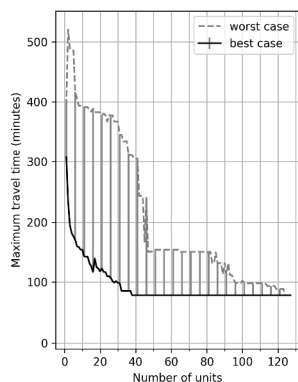

1322x582mm (72 x 72 DPI)

er review only

1  
2  
3  
4  
5  
6  
7  
8  
9  
10  
11  
12  
13  
14  
15  
16  
17  
18  
19  
20  
21  
22  
23  
24  
25  
26  
27  
28  
29  
30  
31  
32  
33  
34  
35  
36  
37  
38  
39  
40  
41  
42  
43  
44  
45  
46  
47  
48  
49  
50  
51  
52  
53  
54  
55  
56  
57  
58  
59  
60

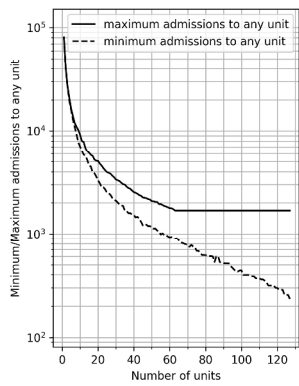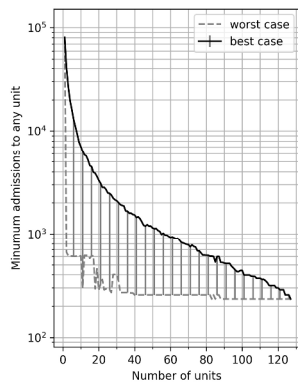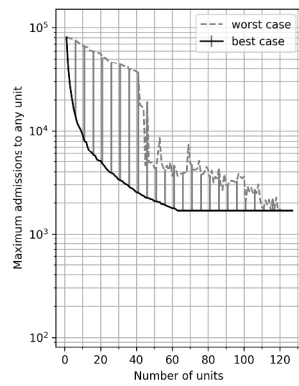

1322x582mm (72 x 72 DPI)

er review only

1  
2  
3  
4  
5  
6  
7  
8  
9  
10  
11  
12  
13  
14  
15  
16  
17  
18  
19  
20  
21  
22  
23  
24  
25  
26  
27  
28  
29  
30  
31  
32  
33  
34  
35  
36  
37  
38  
39  
40  
41  
42  
43  
44  
45  
46  
47  
48  
49  
50  
51  
52  
53  
54  
55  
56  
57  
58  
59  
60

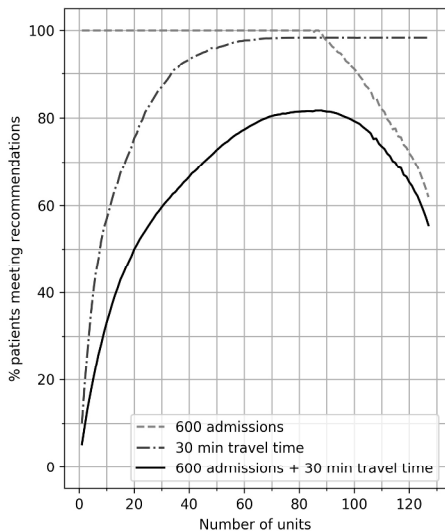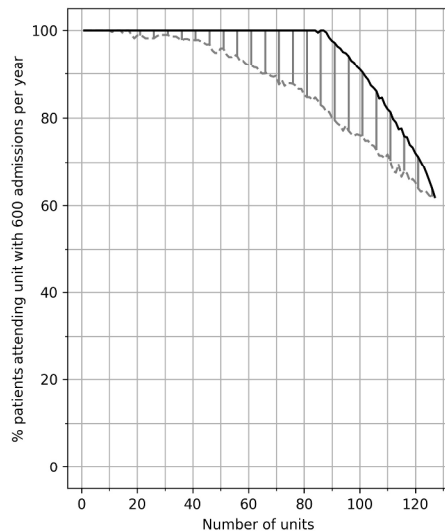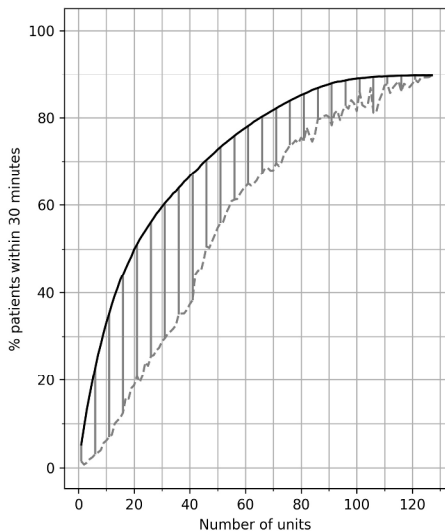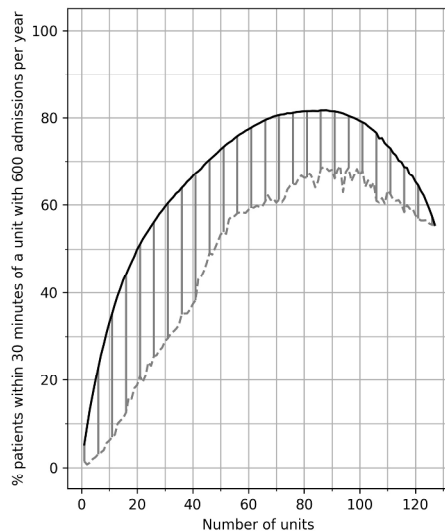

1058x1270mm (72 x 72 DPI)

# Appendix

## 1. Code and data repository

Data and code used for the model are available at:  
[https://github.com/MichaelAllen1966/stroke\\_unit\\_location](https://github.com/MichaelAllen1966/stroke_unit_location)

## 2. NSGA-II overview

The Genetic Algorithm used for this study was based on NSGA-II<sup>1</sup>. This method evolves solutions based on multiple objectives, but without any weighting of objectives. In each generation, the Pareto front of non-dominated solutions is identified. A solution is non-dominated if there are no other solutions at least equal in all objectives and better in at least one objective. Larger populations may be selected by picking subsequent Pareto fronts (re-evaluation the Pareto front after removal of the previous Pareto front identified).

An example of a Pareto front using two objectives is shown in figure 1.

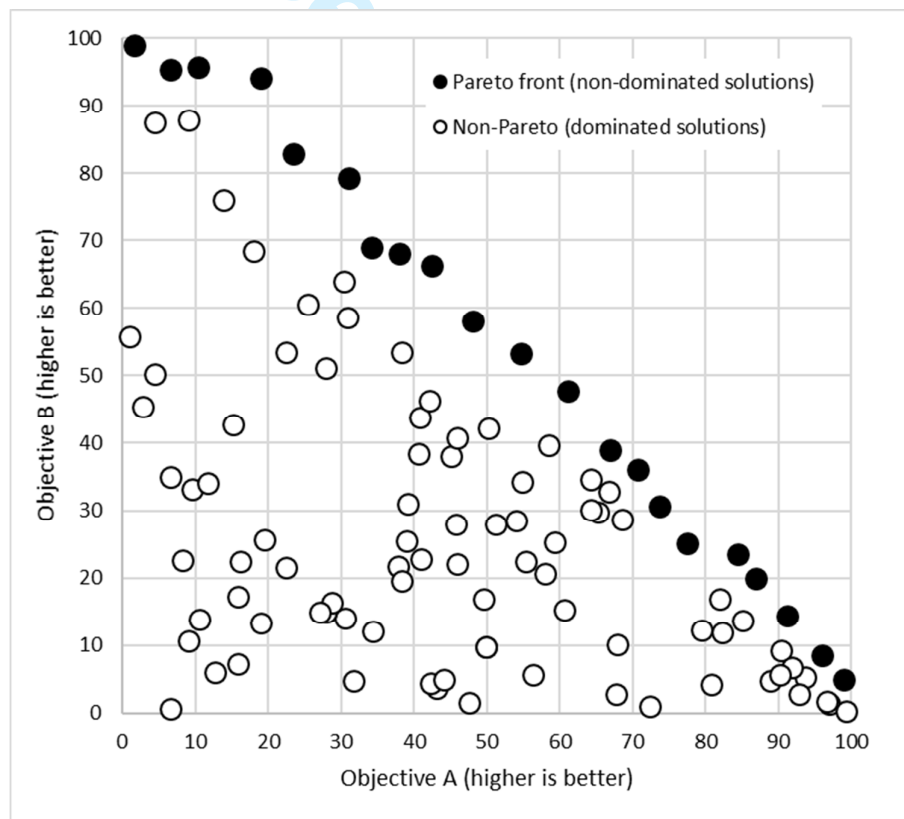

Figure 1. Example of identification of Pareto front (non-dominated) points when comparing two objectives.

## 2.1. Algorithm objectives

The objectives which could be used for genetic selection were:

- 1: Number of hospitals (lower is better)
- 2: Average travel time (lower is better)
- 3: Maximum travel time (lower is better)
- 4: Maximum admissions to any one hospital (lower is better)
- 5: Minimum admissions to any one hospital (higher is better)
- 6: Max/Min admissions ratio (lower is better)
- 7: Proportion patients within estimated 30 min travel distance (higher is better)
- 8: Proportion patients within estimated 45 min travel distance time (higher is better)
- 9: Proportion patients within estimated 60 min travel distance time (higher is better)
- 10: Proportion patients attending unit with target admission numbers (higher is better)
- 11: Proportion patients attending unit with target admission numbers and within estimated 30 min travel time (higher is better)
- 12: Proportion patients attending unit with target admission numbers and within estimated 45 min travel time (higher is better)
- 13: Proportion patients attending unit with target admission numbers and within estimated 60 min travel time (higher is better)

Attempting to optimise on all 13 objectives simultaneously produces slow progress. In order to produce the final solution set a number of runs with more restricted objectives were performed. These were then used as a seed population for further breeding which were then selected based on all objectives.

## 2.2. Description of the genetic algorithm

- 1) Code 127 hospitals (SSNAP acute admitting stroke units) as open/closed binary string of genes.
  - i) e.g. 001011 would be six genes that represent hospitals 3,5&6 being open and 1,2,&4 being closed
- 2) Identify which combination of objectives to use for selection in algorithm (may be from 2 objectives to all objectives).
- 3) Set up initial population of solutions (a typical starting population is 10,000 solutions).
  - i) Randomly choose number of hospitals to open in each solution.
  - ii) Randomly assign open hospitals.
  - iii) A library of solutions may be imported instead of, or in addition to, a random population of solutions.
  - iv) Non-unique solutions are removed.

## 4) Breed solutions.

- i) Choose pairs of solutions at random from the population.
- ii) Select a single crossover point is at random within the solution binary string.
- iii) Join the left section (before the crossover point) of one parent solution to the right section (from the crossover-point rightwards) of the second parent solution to form a new 'child' solution. Produce a second child solution by combining the remaining sections of each parent solution.

e.g. a crossover at point five would perform the following:

Parent A: 1 1 1 1 1 1

Parent B: 0 0 0 0 0 0

Child A: 1 1 1 1 0 0

Child B: 0 0 0 0 1 1

- iv) Perform breeding so that there are as many children as parents.
- v) Randomly mutate children: there is a given probability that any binary element will switch to the opposite (a random mutation probability per element of 0.002 was typically used).
- vi) Combine parents and children to for a new population.
- vii) Remove non-unique solutions and any solutions where all hospitals are closed.

## 5) Calculate the performance of all solutions against the objectives used for selection

## 6) Identify all non-dominated (Pareto front) solutions

- i) If the number of selected solutions is greater than the maximum permitted breeding population then reduce the number of solutions by either 1) picking solutions at random to obtain the required number of solutions to pass on to the next generation, or (2) pick two solutions and random and use tournament selection based on crowding distance (a measure of how close the solution scores are to nearest neighbour scoring solutions)
- ii) If the number of selected solutions is lower than the minimum permitted breeding population then remove the previously selected non-dominated solutions and repeat the Pareto selection until sufficient solutions have been identified (if a selection produces more than the maximum number of selected solutions, then random selection is performed just on the last Pareto front in order not to exceed the maximum number of solutions to pass on to the next generation.
- iii) Store the first Pareto front solutions.
- iv) Note: The minimum and maximum number of solutions to pass on to the next generation may be the same number to keep solution size constant. Alternatively, a range of population size may be acceptable (e.g. a minimum number of 1,000 solutions may be chosen, but a maximum number of 5,000 solutions may be permitted. In this case Pareto selection is repeated until at least 1,000 solutions have been selected, but

1  
2  
3 restriction on the number of solutions only occurs if the number of solutions chosen  
4 exceeds 5,000).

- 5  
6 7) Repeat steps 4-6 until the maximum number of generations is reached or the algorithm is  
7 stopped by another indicator.  
8  
9 i) Population diversity is monitored using average Hamming distance. The Hamming  
10 distance between any two solutions is the proportion of genes that are different.  
11 Average Hamming distance is the mean Hamming distances for all pairwise comparisons  
12 in the population (after first Pareto front selection). Genetic algorithms were typically  
13 stopped when there was a change of <0.001 in average Hamming distance across 5  
14 generations.  
15

## 16 17 18 19 References

- 20 1. Deb, K., Pratap, A., Agarwal, S. & Meyarivan, T. A fast and elitist multiobjective genetic  
21 algorithm: NSGA-II. *IEEE Trans. Evol. Comput.* **6**, 182–197 (2002).  
22  
23  
24  
25  
26  
27  
28  
29  
30  
31  
32  
33  
34  
35  
36  
37  
38  
39  
40  
41  
42  
43  
44  
45  
46  
47  
48  
49  
50  
51  
52  
53  
54  
55  
56  
57  
58  
59  
60

# BMJ Open

## Feasibility of a hyper-acute stroke unit model of care across England. A modelling analysis.

|                                 |                                                                                                                                                                                                                                                                                                                                              |
|---------------------------------|----------------------------------------------------------------------------------------------------------------------------------------------------------------------------------------------------------------------------------------------------------------------------------------------------------------------------------------------|
| Journal:                        | <i>BMJ Open</i>                                                                                                                                                                                                                                                                                                                              |
| Manuscript ID                   | bmjopen-2017-018143.R1                                                                                                                                                                                                                                                                                                                       |
| Article Type:                   | Research                                                                                                                                                                                                                                                                                                                                     |
| Date Submitted by the Author:   | 01-Sep-2017                                                                                                                                                                                                                                                                                                                                  |
| Complete List of Authors:       | Allen, Michael; University of Exeter Medical School<br>Pearn, Kerry; University of Exeter, Medical School<br>Villeneuve, Emma; University of Exeter, Medical School<br>Monks, T; University of Southampton Faculty of Health Sciences<br>Stein, Ken; University of Exeter, Medical School<br>James, Martin; Royal Devon and Exeter Hospital, |
| <b>Primary Subject Heading</b>: | Health services research                                                                                                                                                                                                                                                                                                                     |
| Secondary Subject Heading:      | Cardiovascular medicine                                                                                                                                                                                                                                                                                                                      |
| Keywords:                       | Stroke < NEUROLOGY, Organisation of health services < HEALTH SERVICES ADMINISTRATION & MANAGEMENT, Quality in health care < HEALTH SERVICES ADMINISTRATION & MANAGEMENT                                                                                                                                                                      |
|                                 |                                                                                                                                                                                                                                                                                                                                              |

SCHOLARONE™  
Manuscripts



# Feasibility of a hyper-acute stroke unit model of care across England. A modelling analysis.

Michael Allen\*, Kerry Pearn, Emma Villeneuve, Thomas Monks, Ken Stein, Martin James

Michael Allen, Honorary Research Fellow, University of Exeter Medical School, St Luke's Campus, Heavitree Road, EXETER, EX1 2LU, UK

Kerry Pearn, Associate Research Fellow, University of Exeter Medical School, St Luke's Campus, Heavitree Road, EXETER, EX1 2LU, UK

Emma Villeneuve, Associate Research Fellow, University of Exeter Medical School, St Luke's Campus, Heavitree Road, EXETER, EX1 2LU, UK

Thomas Monks, Principal Research Fellow, NIHR CLAHRC Wessex Data Science Hub, Room AA72 South Academic Block, Southampton General Hospital, SOUTHAMPTON, SO16 6YD

Ken Stein, Deputy Director of PenCLAHRC, University of Exeter Medical School, St Luke's Campus, Heavitree Road, EXETER, EX1 2LU, UK

Martin James, Consultant Stroke Physician, Royal Devon & Exeter NHS trust, Barrack Road, EXETER, EX2 5DW, UK

\*Correspondence to: [m.allen@exeter.ac.uk](mailto:m.allen@exeter.ac.uk)

The Corresponding Author has the right to grant on behalf of all authors and does grant on behalf of all authors, a worldwide licence to the Publishers and its licensees in perpetuity, in all forms, formats and media (whether known now or created in the future), to i) publish, reproduce, distribute, display and store the Contribution, ii) translate the Contribution into other languages, create adaptations, reprints, include within collections and create summaries, extracts and/or, abstracts of the Contribution, iii) create any other derivative work(s) based on the Contribution, iv) to exploit all subsidiary rights in the Contribution, v) the inclusion of electronic links from the Contribution to third party material where-ever it may be located; and, vi) licence any third party to do any or all of the above.

All authors have completed the ICMJE uniform disclosure form at [www.icmje.org/coi\\_disclosure.pdf](http://www.icmje.org/coi_disclosure.pdf) and declare: no support from any organisation for the submitted work; no financial relationships with any organisations that might have an interest in the submitted work in the previous three years; no other relationships or activities that could appear to have influenced the submitted work.

## Ethics

This study used aggregate patient counts only, obtained from HES. No individual patient-level data was sought, obtained or used in the study. No ethical approval was sought.

## Authorship & contributorship

Michael Allen is the lead author and guarantor, and proposed the key methodology to be used in the study. He also contributed to coding of the model.

Kerry Pearn wrote much of the code used in the model, and contributed to refining the basis of the modelling. She was involved in reviewing and editing the paper.

Emma Villeneuve developed the initial prototypes of the model employed, testing a number of heuristic approaches. She was involved in reviewing and editing the paper.

Thomas Monks framed the initial problem of balancing access to stroke care with developing a unit of sufficient size to maintain expertise, and recommended the modelling study contained herein<sup>1</sup>. He critiqued the methods used in this study, and was involved in reviewing and editing the paper.

Ken Stein oversaw all work. He was involved in framing the problem to be modelled<sup>1</sup>. He critiqued the methods used in this study, and was involved in reviewing and editing the paper.

Martin James is the clinical stroke consultant for the work and paper. He was involved in framing the problem to be modelled<sup>1</sup>. He advised on the clinical objectives of the study, was involved in authoring, reviewing and editing the paper.

1. Monks T, Pitt M, Stein K, et al. Hyperacute stroke care and NHS England's business plan. *BMJ* 2014;34

## Transparency

The lead author (Michael Allen) confirms that the manuscript is an honest, accurate, and transparent account of the study being reported; that no important aspects of the study have been omitted.

## Funding

This study was funded by the National Institute of Health Research (NIHR) Collaboration for Leadership in Applied Health Research and Care for the South West Peninsula. The views and opinions expressed in this paper are those of the authors, and not necessarily those of the NHS, the National Institute for Health Research, or the Department of Health.

## Data sharing

Full data and code used for this study is available at:  
[https://github.com/MichaelAllen1966/stroke\\_unit\\_location](https://github.com/MichaelAllen1966/stroke_unit_location)

Included in the data and code are:

Counts of acute stroke admissions by LSOA

Estimated travel times from all LSOAs to all acute stroke units

Hospital information (name, location)

Full source code used to produce results reported here (which runs using open source software)

## Abstract

**Objectives:** The policy of centralising hyperacute stroke units (HASUs) in England aims to provide stroke care in units that are both large enough to sustain expertise (>600 admissions/year) and dispersed enough to rapidly deliver time-critical treatments (<30 minutes maximum travel time). Currently, just over half (56%) of stroke patients access care in such a unit. We sought to model national configurations of HASUs that would optimise both institutional size and geographical access to stroke care, to maximise the population benefit from the centralisation of stroke care.

**Design:** Modelling of the effect of the national reconfiguration of stroke services. Optimal solutions were identified using a heuristic genetic algorithm.

**Setting:** 127 acute stroke services in England, serving a population of 54 million people.

**Participants:** 238,887 emergency admissions with acute stroke over a 3-year period (2013-2015).

**Intervention:** Modelled reconfigurations of HASUs optimised for institutional size and geographical access.

**Main Outcome Measure:** Travel distances and times to HASUs, proportion of patients attending a HASU with at least 600 admissions per year, minimum and maximum HASU admissions.

**Results:** Solutions were identified with 75-85 HASUs with annual stroke admissions in the range 600-2,000, which achieve up to 82% of patients attending a stroke unit within 30 minutes estimated travel time (with at least 95% and 98% patients being within 45 and 60 minutes travel time respectively).

**Conclusions:** The reconfiguration of hyperacute stroke services in England could lead to all patients being treated in a HASU with between 600 and 2,000 admissions per year. However, the proportion of patients within 30 minutes of a HASU would fall from over 90% to 80-82%.

## Article summary

### Strengths and weaknesses

- The study described allows for a national view of the relationship between the number of acute stroke units (based on choosing from current locations of acute stroke units) in England and the dual goals of (1) having all patients attend a stroke unit with at least 600 acute confirmed stroke admissions per year, and (2) having patients within 30 minutes of an acute stroke unit.
- The study uses a genetic algorithm that is able to hunt for solutions when there are a vast range of possibilities.
- The study takes an objective approach with explicitly described objectives.
- A limitation of the study is that identified solutions do not take into account the complex local pressures and reasons for preferring one unit over another at the cost of the objectives used in identifying solutions in this study.

### Introduction

Stroke is a leading cause of death and disability worldwide, with an estimated 5.9 million deaths and 33 million stroke survivors in 2010[1]. In England, Wales and Northern Ireland 85,000 people are hospitalised with stroke each year[2], and stroke is ranked third as a cause of loss of disability-adjusted life years in the UK over the last 25 years[3].

In recent years the NHS in England has sought to promote the reconfiguration of stroke services across the country, building on the evidence-based model developed in London[4]. Centralisation of stroke care in London has been shown to increase thrombolysis rates, reduce mortality, reduce length of stay, and reduce long-term costs to the NHS[5,6]. These benefits are considered to be due to patients being cared for by specialist stroke teams, facilitated by direct hospital admission to a large hyperacute stroke unit (HASU). In the HASU model of care patients are taken directly to units which may provide immediate response to stroke, including assessment, stabilisation and any primary intervention, before later discharge or transfer to step-down local stroke units[7]. Guidelines recommend a minimum number of admissions to a HASU of 600 patients per year, and NHS England reconfiguration guidelines also suggest 'travel time should be ideally 30 minutes but no more than 60 minutes'[8,9]. Centralisation of acute stroke care in London was guided by a modelling exercise whereby sites were identified with no Londoner more than a 30 minute ambulance journey from the nearest HASU[5]. Time from onset to emergency hospital treatment is known to be especially critical for ischaemic stroke, when the effectiveness of thrombolysis declines rapidly in the first few hours after stroke[10]. More recently, mechanical thrombectomy has shown effectiveness in patients presenting up to 6 hours after stroke onset, with effectiveness still higher if treatment is given earlier[11].

With the critical importance of speed to treatment with thrombolysis or thrombectomy, it has nonetheless been questioned if the improvements in outcome that came with centralisation of stroke services in metropolitan areas could be replicated in more rural environments, with modelling being suggested as a first step at analysing the problem[12]. We therefore sought to investigate the potential for meeting the dual objectives of all patients with acute stroke being admitted to a HASU of sufficient size (at least 600 acute stroke patients per year) and that unit being within 30 minutes travel time. The modelling described here focusses on the Hyper Acute Stroke Unit phase of stroke care[7] and does not extend to organisation of ongoing step-down care in local stroke units, or after discharge home.

## Methods

Detailed methods, with links to underlying data and source code used, are given in the on-line appendix.

The model predicts, for any configuration of HASUs, the travel times (fastest road travel time chosen, from home location of patient to hospital with the shortest estimated travel time), and the number of admissions to each HASU. A genetic algorithm was used to identify good configurations.

We included 238,887 patients coded with ischaemic or haemorrhagic stroke (ICD-10 I61, I63, I64) with an emergency admission over a three-year period (2013-2015). Stroke admission numbers were counts of admissions for each of 31,771 Lower Super Output Areas (LSOAs) in England. No individual patient level data was accessed: counts of admissions per LSOA were extracted from Hospital Episode Statistics (HES; <http://www.hscic.gov.uk/hes>) with access to national HES data managed through Lightfoot Solutions (<http://www.lightfootsolutions.com/>). Estimated fastest road travel times were obtained from a geographic information system (Maptitude, with MP-MileCharter add-in).

We used a genetic algorithm based on NSGA-II[13] to derive potential configurations of HASUs across England, balancing competing objectives. Solutions were eliminated if another solution was equally as good in all optimisation parameters and was better in at least one parameter. The selected configurations were based on a range of optimisation parameters (listed in the online appendix) which seek to minimise travel distances and to control admission numbers (admitting as many people to HASUs with at least 600 admissions per year while also seeking to control the maximum number of admissions to any hospital). Solutions retained are referred to as non-dominated solutions; together these form a 'Pareto front' where improved performance in one objective can only be at the expense of another.

## Results

The model assumes patients attend the hospital closest to their home location. In order to test this assumption we compared admissions predicted assuming that the closest hospital was used with actual admissions to each hospital. When comparing predicted with actual admissions there was a median absolute error of 105 admissions per unit per year, or a relative absolute error of 17%. Prediction accuracy depended on proximity to a hospital's nearest neighbour, and was proportionately greater in urban areas where travel distance is less of a consideration. HASUs located close to other acutely admitting units have a poorer prediction accuracy than those located further from the nearest alternative acute stroke unit (figure 1). These results gave confidence in progressing with the basic model assumption that patients should generally attend their closest unit.

With an increasing number of HASUs, average and maximum road travel times reduce (figure 2), following the law of 'diminishing returns'. For example, with 24 units (the number of neuroscience centres in England) the lowest average travel time is 34 minutes. As the number of HASUs is increased to 50, 75 and 100, the best average travel times found are 26, 22 and 19 minutes respectively. The best maximum travel time found are 109, 99, 78 and 78 minutes with 25, 50, 75 and 100 HASUs. Average and maximum travel times for the identified solutions depend on what other factors are prioritised in the model. For example, with 25 HASUs, average travel distances in different configurations (all of which are non-dominated solutions) range from 34 to 62 minutes, and maximum travel time range from 109 to 378 minutes.

1  
2  
3 As the number of HASUs increases, both the maximum and minimum number of admissions to any  
4 single hospital in the configuration reduces (figure 3). For example, with 25 units the lowest possible  
5 maximum number of admissions to any single unit is 4,381 admissions per year. With 50, 75 and 100  
6 units the largest hospital has admissions of 2,493, 1,829 and 1,687 patients per year. These results  
7 represent the best compromise between unit size and distance if no other factors are regarded as  
8 important. To achieve all admissions attending a HASU with at least 600 admissions per year the  
9 maximum number of hospitals is 85, by which point 82% of the population is within 30 minutes  
10 travel (with 95% and 98% being within 45 and 60 minutes, and the maximum travel time is 99  
11 minutes).

12  
13  
14 As the number of HASUs increases, the proportion of patients within 30 minutes travel increases  
15 (figure 4), to a maximum of 90% (the best possible proportions with 25, 50, 75 and 100 units were  
16 52%, 70%, 84% and 88%). At the same time, increasing the number of HASUs reduces the number of  
17 patients attending a unit with at least 600 admissions per year (figure 4). Increasing the number of  
18 units lead first to an increase in the proportion of patients attending a unit of sufficient size within 30  
19 minutes travel, but when increased further a reduction in this proportion is seen (figure 4). The  
20 maximum proportion of patients attending a unit admitting 600 patients per year within 30 minutes  
21 travel is 82%. Solutions with at least 80% of patients being within 30 minutes of a HASU admitting at  
22 least 600 patients per year have between 75 and 95 HASUs. If target travel time is increased from 30  
23 to 45 minutes then the maximum proportion of patients attending a HASU of sufficient size is 95%,  
24 with this maximum occurring with between 65 and 90 units.

25  
26  
27 In each configuration it may be important to control the maximum number of admissions to any  
28 single unit. Configurations of between 75 and 85 HASUs were identified with all patients attending a  
29 unit admitting 600 patients per year, at least 80% of patients within 30 minutes travel and maximum  
30 admissions to any single HASU of no greater than 2,000. The algorithm identified 93 configurations in  
31 which annual admissions were kept within 600-2,000, at least 80% of patients were within 30  
32 minutes of their closest HASU, and at least 95% and 98% of patients were with 45 and 60 minutes of  
33 their closest unit. The distribution of size of unit, among all solutions with yearly admissions per unit  
34 within the 600 to 2,000 range was skewed significantly towards lower admissions (figure 5), with only  
35 10% of units having more than 1,500 admissions per year.

## 36 37 38 39 Discussion

40 Our modelling of national configurations of HASUs, designed to replicate the population benefits  
41 from centralisation of acute stroke services, has shown the feasibility but also the compromises  
42 necessary to maximise these benefits. Currently just over half (56%) of patients with acute stroke are  
43 admitted to a stroke unit with at least 600 admissions per year[2], and NHS England proposes to  
44 increase this proportion through centralisation in fewer, larger units[14]. These HASUs would have  
45 staffing levels and competencies as specified in national standards[15,16], and provide intensive  
46 (level 2) nursing and medical care for the initial 72 hours after onset (on average) before repatriation  
47 of the patient once medically stable to local step-down services for ongoing acute care and  
48 rehabilitation. By reducing from the current 127 acute sites to between 75-85 HASUs, our centralised  
49 HASU model predicts it is possible for all stroke patients to attend a unit of sufficient size, but with a  
50 reduction in the proportion of patients within 30 minutes travel from the current 90% to 80-82%,  
51 and with 95% and 98% of patients within 45 and 60 minutes travel respectively.

52  
53  
54  
55 Maximising the number of patients attending a HASU with at least 600 stroke admissions per year is  
56 not an end in itself. The figure is an approximation for the size of a HASU able to develop and sustain  
57 expertise in stroke care[9], and overcome identified barriers to improved care such as  
58  
59  
60

1  
2  
3 thrombolysis[17–19]. An association has been observed between door-to-needle time for  
4 thrombolysis and institutional size[20,21]. Patients admitted to HASUs in areas that have undergone  
5 centralisation were found to be more likely to receive other important clinical interventions such as  
6 brain scanning and direct admission to a stroke unit sooner[22]. However, the corollary of such  
7 centralisations is the creation of very large units: the most recent Greater Manchester  
8 reconfiguration has created one HASU with over 2,000 stroke admissions/year. Our modelling has  
9 explored the compromises between institutional size and distance, and the differential effects from  
10 centralisation in urban and rural areas. In seeking to balance these often competing priorities, we  
11 sought solutions where the largest unit had fewer than 2,000 confirmed stroke admissions per year.  
12 We observed that in centralised solutions with all hospital admissions between 600 and 2,000  
13 admissions per year, fewer than 10% of hospitals would have admissions of more than 1,500 per  
14 year. Nevertheless, large-scale reconfigurations raise significant issues around the capacity of a small  
15 number of very large receiving HASUs, both in infrastructure and workforce, and the potential  
16 disbenefits of such large units (if any) are much less well understood. Centralisation to 75-85  
17 hospitals in the manner we have described could therefore be expected to provide a significant  
18 benefit to the majority of patients. To yield these benefits, the large majority of patients will travel  
19 only moderately further (if at all) to reach a HASU. The disbenefits are to approximately 1.5% of the  
20 population who would be more than 60 minutes away from a reconfigured HASU (compared with an  
21 estimated 0.3% with all current acute stroke units), and to the 2% of patients who are currently  
22 within 30 minutes of an existing centre but who, with centralisation, will travel more than 45 minutes  
23 to their nearest HASU. Consideration is therefore needed of how the disbenefits for these patients  
24 might be mitigated. Increased travel times might be offset by targeted stroke awareness campaigns  
25 (which have been shown to enhance patient response to suspected stroke[23]) leading to earlier  
26 contact of emergency services. Increased travel time may also be offset by reduced door-to-  
27 treatment time in the HASU[20,24]. More radical solutions for isolated areas include mobile  
28 diagnosis and treatment[25]. Early diagnostic access and intravenous thrombolysis is a particular  
29 issue given the paucity of geographical coverage of mechanical thrombectomy in the UK, which  
30 promotes a model of 'drip-and-ship' (near-patient thrombolysis followed by immediate transfer to a  
31 more distant thrombectomy centre); currently only 75% of the English population is within 45  
32 minutes travel time of one of the current 24 neurosciences centres, where the expertise in this  
33 procedure is exclusively concentrated. All of these impacts from reconfiguration are not uniformly  
34 distributed, but fall disproportionately on more rural populations, and the existing evidence base  
35 from predominantly metropolitan reconfigurations[5,7] does not allow a precise estimate of the  
36 trade-offs at hand when balancing locality against institutional size – a limitation that will hamper  
37 professional and public debate regarding the benefits and consequences of large service  
38 reorganisations.

39  
40  
41  
42  
43  
44  
45  
46 In constructing our model, we have assumed all patients will be taken to their closest HASU. If this is  
47 not the case (such as decisions being made instead on organisational boundaries) then some  
48 inaccuracy of the model around those boundaries is expected. This will be especially true in areas  
49 that have more than one HASU in close proximity; in such cases choice of destination may be  
50 influenced by factors (such as institutional reputation) other than shortest travel time. With  
51 increasing centralisation inaccuracies due to the proximity of units will reduce, as fewer patients will  
52 be on the boundary where travel time is not the only influence on the destination. We have also  
53 sought to avoid infeasibly large units (those larger than the any existing HASU with more than 2,000  
54 stroke admissions/year), particularly as such an arrangement involves large numbers of stroke-like  
55 presentations ('stroke mimics') also being conveyed to a HASU – such mimics represent as much as  
56 an additional 32% of admissions[26]. Centralisation therefore raises significant issues around the  
57  
58  
59  
60

1  
2  
3 capacity of receiving HASUs, both in infrastructure and workforce. Continued capacity at any HASU  
4 will depend on the efficient repatriation to locally-based post-acute and rehabilitation services (e.g.  
5 after the first 48-72 hours of care), and we have not modelled these effects or their vulnerability in  
6 this paper. There is also uncertainty around the recommended target of 600 admissions per year, not  
7 least as random variation would be expected to vary this figure between 550-650 (based on a  
8 Poisson distribution). With an ageing population, however, we anticipate a steady increase in  
9 admissions to hospital with disabling stroke despite better preventative care, particularly in stroke  
10 related to atrial fibrillation[27]. Although such forecasting is imprecise, a potential increase in stroke  
11 incidence and hospital admissions could be driven by a predicted 54% increase in the population of  
12 England aged 75 or over the next 15 years[28]. Such a rise would militate against enforcing the lower  
13 threshold for admissions too strictly (a centre admitting 500 strokes/year at present would very  
14 possibly be above that threshold in years to come), and may incline planners to err towards a lower  
15 maximum size for any one HASU of say, 1,500 stroke admissions/year, to allow for the projected  
16 growth in stroke incidence.  
17  
18  
19

20 Care should always be taken when considering what appear to be mathematically 'optimal' solutions.  
21 A model of this size identifies many solutions that have very similar performance, with only marginal  
22 differences between them. Our results are therefore best interpreted as showing the broad number  
23 of HASUs that are needed on a national or regional scale to deliver the maximum benefit from  
24 centralisation, and what impact this is likely to have on a significant minority of patients. Multiple  
25 objective optimisation location problems rarely, if ever, have a single explicit solution, and can  
26 illuminate but not dictate regional planning which is still best conducted on a smaller scale,  
27 incorporating other local knowledge. Nonetheless, national-level analysis can provide an insight into  
28 the range of optimal distributions of stroke centres across England, for which geographical factors  
29 are of greater importance than in the predominantly urban reconfigurations that have taken place  
30 thus far. For the population of over 8 million people in London, reconfiguration resulted in 8 HASUs  
31 with a range of annual stroke admissions between 775 and 1,288 (or 1,023 – 1,700 when FAST-  
32 positive stroke mimics are included), and an average ambulance travel time of 17 minutes[2,7]; in  
33 Greater Manchester, reconfiguration resulted in 3 HASUs (total stroke admissions between 1,073 and  
34 2,015/year) serving a population of approximately 2.8 million. The national algorithm has identified  
35 many possible configurations in which annual admissions to any HASU are within the range 600-  
36 2,000 and with at least 80% of patients within 30 minutes of their closest HASU. Choosing between  
37 approximately similar options will require other considerations to be taken into account, and this is  
38 best performed at a regional level – although not at the relatively small 'footprint' of many of NHS  
39 England's 44 Sustainability and Transformation Plans (STPs), the current geographical unit of  
40 planning.  
41  
42  
43  
44

45 Acute stroke care is evolving, and the development of mechanical thrombectomy for acute large  
46 artery stroke is likely to create an imperative for still greater centralisation of services[11]. The  
47 geographical issues we have identified here will act as an even greater influence on service planning  
48 for such specialised treatment, with a similar or more pronounced differential effect between urban  
49 and rural environments – removing, for example, the rationale for any metropolitan HASU that is not  
50 also capable of delivering mechanical thrombectomy. Further modelling work should be focussed on  
51 how best to organise care across England when still greater centralisation of some services are  
52 required for a significant proportion of patients.  
53  
54  
55  
56  
57  
58  
59  
60



## Conclusions

A policy of centralising acute stroke services across England in 75-85 HASUs could realistically achieve 80-85% of patients attending an acute unit of sufficient size within 30 minutes travel time (with 95% and 98% being within 45 and 60 minutes travel respectively), and with no unit larger than 2,000 stroke admissions per year. Though centralisation could offer significant advantages to the large majority of patients, a small minority (2-4% of the population) would be significantly adversely affected by centralisation, and planning for this minority will inevitably involve compromise between the recommended ideal institutional size and travel times. With centralisation of hyper-acute care, thought also needs to be given to optimal organisation of follow-on care at home or in step-down units, which is beyond the scope of this paper.

For peer review only

## What is known already, and what this study adds

### What is known already?

NHS England's policy for the centralisation of acute stroke care is based on observational evidence of the mortality benefits from such centralised services, and recommends that all patients should attend a hyperacute stroke unit that both admits at least 600 acute stroke patients per year and is within 30 minutes travel time. Currently just over half (55%) of patients in England receive care at a HASU fulfilling both these conditions.

### What this study adds

Applying a multi-objective genetic algorithm approach, we predict that centralising acute stroke services across England in 75-85 HASUs (from the present 127 stroke centres) could realistically achieve all patients attending a stroke unit which has at least 600 acute stroke admissions per year, with 82%, 97% and 99% patients being within 30, 45 and 60 minutes travel respectively. The disbenefit to a significant rural minority is that approximately 7% of patients will move out of a 30 minute travel distance, and an additional 0.7% of patients move out of a 60 minute travel distance.

## Acknowledgements

This study was funded by the National Institute of Health Research (NIHR) Collaboration for Leadership in Applied Health Research and Care for the South West Peninsula. The views and opinions expressed in this paper are those of the authors, and not necessarily those of the NHS, the National Institute for Health Research, or the Department of Health.

## References

- 1 Feigin VL, Forouzanfar MH, Krishnamurthi R, *et al.* Global and regional burden of stroke during 1990-2010: Findings from the Global Burden of Disease Study 2010. *Lancet* 2014;**383**:245–55. doi:10.1016/S0140-6736(13)61953-4
- 2 Sentinel Stroke Audit Programme (SSNAP). Apr2015Mar2016-AnnualResultsPortfolio. Natl. Results April 2015-Mar 2016 <https://www.strokeaudit.org/Documents/Results/National/Apr2015Mar2016/Apr2015Mar2016-AnnualResultsPortfolio.aspx>. 2016.
- 3 Newton JN, Briggs ADM, Murray CJL, *et al.* Changes in health in England, with analysis by English regions and areas of deprivation, 1990-2013: A systematic analysis for the Global Burden of Disease Study 2013. *Lancet* 2015;**386**:2257–74. doi:10.1016/S0140-6736(15)00195-6
- 4 NHS England. Putting Patients First: The NHS business plan 2013/4 - 2015/6. <https://www.england.nhs.uk/wp-content/uploads/2014/04/ppf-1415-1617-wa.pdf> Published Online First: 2013. <https://www.england.nhs.uk/wp-content/uploads/2013/04/ppf-1314-1516.pdf>
- 5 Morris S, Hunter RM, Ramsay AIG, *et al.* Impact of centralising acute stroke services in English metropolitan areas on mortality and length of hospital stay: difference-in-differences analysis. *Bmj* 2014;**349**:g4757–g4757. doi:10.1136/bmj.g4757
- 6 Hunter RM, Davie C, Rudd A, *et al.* Impact on Clinical and Cost Outcomes of a Centralized Approach to Acute Stroke Care in London: A Comparative Effectiveness Before and After Model. *PLoS One* 2013;**8**:1–9. doi:10.1371/journal.pone.0070420
- 7 Fulop N, Boaden R, Hunter R, *et al.* Innovations in major system reconfiguration in England: a study of the effectiveness, acceptability and processes of implementation of two models of stroke care. *Implement Sci* 2013;**8**:5. doi:10.1186/1748-5908-8-5
- 8 Price C, James M. Meeting the Future Challenge of Stroke Meeting the Future Challenge of Stroke. Br. Assoc. Stroke Physicians. 2011. [www.basp.ac.uk](http://www.basp.ac.uk)
- 9 NHS England. Stroke Services: Configuration Decision Support Guide ([www.eoesn.nhs.uk/index.php/download\\_file/force/2069/168/](http://www.eoesn.nhs.uk/index.php/download_file/force/2069/168/)). 2015.
- 10 Emberson J, Lees KR, Lyden P, *et al.* Effect of treatment delay, age, and stroke severity on the effects of intravenous thrombolysis with alteplase for acute ischaemic stroke: A meta-analysis of individual patient data from

- 1  
2  
3 randomised trials. *Lancet* 2014;**384**:1929–35. doi:10.1016/S0140-  
4 6736(14)60584-5  
5  
6 11 Goyal M, Menon BK, Van Zwam WH, *et al*. Endovascular thrombectomy after  
7 large-vessel ischaemic stroke: A meta-analysis of individual patient data from  
8 five randomised trials. *Lancet* 2016;**387**:1723–31. doi:10.1016/S0140-  
9 6736(16)00163-X  
10  
11 12 Monks T, Pitt M, Stein K, *et al*. Hyperacute stroke care and NHS England's  
13 business plan. *BMJ* 2014;**348**:g3049. doi:10.1136/bmj.g3049  
14  
15 13 Deb K, Pratap A, Agarwal S, *et al*. A fast and elitist multiobjective genetic  
16 algorithm: NSGA-II. *IEEE Trans Evol Comput* 2002;**6**:182–97.  
17 doi:10.1109/4235.996017  
18  
19 14 NHS England. Our Business Plan 2016/17.  
20 2016.https://www.england.nhs.uk/wp-content/uploads/2016/03/bus-plan-16.pdf  
21  
22 15 Intercollegiate Stroke Working Party. National Clinical Guideline for Stroke, 5th  
23 Edition (Royal College of Physicians of London).  
24 2016.www.strokeaudit.org.uk/guideline (accessed 2 Aug 2017).  
25  
26 16 NHS England. Seven Day Services Clinical Standards.  
27 2017.https://www.england.nhs.uk/wp-content/uploads/2017/02/clinical-  
28 standards-feb17.pdf  
29  
30 17 Eissa A, Krass I, Bajorek B V. Barriers to the utilization of thrombolysis for  
31 acute ischaemic stroke. *J Clin Pharm Ther* 2012;**37**:399–409.  
32 doi:http://dx.doi.org/10.1111/j.1365-2710.2011.01329.x  
33  
34 18 Carter-Jones CR. Stroke thrombolysis: Barriers to implementation. *Int. Emerg.*  
35 *Nurs.* 2011;**19**:53–7. doi:10.1016/j.ienj.2010.02.005  
36  
37 19 Monks T, Pitt M, Stein K, *et al*. Maximizing the population benefit from  
38 thrombolysis in acute ischemic stroke: A modeling study of in-hospital delays.  
39 *Stroke* 2012;**43**:2706–11. doi:10.1161/STROKEAHA.112.663187  
40  
41 20 Bray BD, Campbell J, Cloud GC, *et al*. Bigger, faster?: Associations between  
42 hospital thrombolysis volume and speed of thrombolysis administration in  
43 acute ischemic stroke. *Stroke* 2013;**44**:3129–35.  
44 doi:10.1161/STROKEAHA.113.001981  
45  
46 21 Strbian D, Ahmed N, Wahlgren N, *et al*. Trends in Door-to-Thrombolysis Time  
47 in the Safe Implementation of Stroke Thrombolysis Registry. *Stroke*  
48 2015;**46**:1275–80. doi:10.1161/STROKEAHA.114.007170  
49  
50 22 Ramsay AIG, Morris S, Hoffman A, *et al*. Effects of centralizing acute stroke  
51 services on stroke care provision in two large metropolitan areas in England.  
52 *Stroke* 2015;**46**:2244–51. doi:10.1161/STROKEAHA.115.009723  
53  
54  
55  
56  
57  
58  
59  
60

- 1  
2  
3 23 Mellon L, Doyle F, Rohde D, *et al*. Stroke warning campaigns: delivering better  
4 patient outcomes? A systematic review. *Patient Relat Outcome Meas*  
5 2015;**6**:61. doi:10.2147/PROM.S54087  
6  
7  
8 24 Meretoja A, Strbian D, Mustanoja S, *et al*. Reducing in-hospital delay to 20  
9 minutes in stroke thrombolysis. *Neurology* 2012;**79**:306–13.  
10 doi:10.1212/WNL.0b013e31825d6011  
11  
12 25 Kunz A, Ebinger M, Geisler F, *et al*. Functional outcomes of pre-hospital  
13 thrombolysis in a mobile stroke treatment unit compared with conventional  
14 care: an observational registry study. *Lancet Neurol* 2016;**15**:1035–43.  
15 doi:10.1016/S1474-4422(16)30129-6  
16  
17  
18 26 Dawson A, Cloud GC, Pereira AC, *et al*. Stroke mimic diagnoses presenting to  
19 a hyperacute stroke unit. *Clin Med* 2016;**16**:423–6.  
20 doi:10.7861/clinmedicine.16-5-423  
21  
22  
23 27 Yiin GSC, Howard DPJ, Paul NLM, *et al*. Recent time trends in incidence,  
24 outcome and premorbid treatment of atrial fibrillation-related stroke and other  
25 embolic vascular events: a population-based study. *J Neurol Neurosurg*  
26 *Psychiatry* 2017;**88**:12–8. doi:10.1136/jnnp-2015-311947  
27  
28 28 Office of National Statistics. Office of National Statistics (2014). 2014-based  
29 subnational population projections.  
30 2014. [https://www.ons.gov.uk/peoplepopulationandcommunity/populationandmi](https://www.ons.gov.uk/peoplepopulationandcommunity/populationandmigration/populationprojections/datasets/regionsinenglandtable1)  
31 [gration/populationprojections/datasets/regionsinenglandtable1](https://www.ons.gov.uk/peoplepopulationandcommunity/populationandmigration/populationprojections/datasets/regionsinenglandtable1)  
32  
33  
34  
35  
36  
37  
38  
39  
40  
41  
42  
43  
44  
45  
46  
47  
48  
49  
50  
51  
52  
53  
54  
55  
56  
57  
58  
59  
60

## Figure legends

Figure 1. Error in predicting admissions (as recorded in SSNAP) grouped by proximity to the closest neighbouring acute stroke unit (10 minute bins). Points show median with error bars indicating inter-quartile range. The left panel shows the absolute error in predicting admission numbers per year, the right panel shows the absolute error as a percentage of actual admissions for each unit.

Figure 2. The effect of changing the number of acute stroke units on average and maximum travel times. The left panel shows the best average and maximum travel times achieved by the algorithm. The middle panel shows average travel times. The bold line represents the best result identified in any scenario. The dotted line shows the worst result identified for a non-dominated solution. The shaded area represents the effective region of trade-off between average travel time and other optimisation parameters. The right panel repeats these results for maximum travel time.

Figure 3. The effect of changing the number of acute stroke units on minimum and maximum admissions to any single unit. The left panel shows the best admissions identified by the algorithm (it is better to have a higher minimum number of admissions and lower maximum admissions; that is the smallest hospital should be as large as possible, and the largest hospital as small as possible). The middle panel shows minimum admission numbers (to the smallest unit in each scenario). The bold line represents the best result identified in any scenario. The dotted line shows the worst result identified for a non-dominated solution. The shaded area represents the effective region of trade-off between average minimum admissions and other optimisation parameters. The right panel repeats these results for maximum admissions in a scenario.

Figure 4. The effect of changing the number of acute stroke units on the proportion of patients attending a unit with 600 admissions per year, the proportion of patients attending a unit within 30 minutes of home location and the proportion of patients attending a unit with 600 admissions per year and within 30 minutes of home location. The top left panel shows the best solutions for each identified by the algorithms. The top right panels shows the proportion of patients attending a unit with 600 admissions per year. The bold line represents the best result identified in any scenario. The dotted line shows the worst result identified for a non-dominated solution. The shaded area represents the effective region of trade-off between attending a unit with target admission numbers and other optimisation parameters. The bottom two panels repeat the analysis for the proportion of patients attending a unit within 30 minutes of home location and the proportion of patients attending a unit with 600 admissions per year and within 30 minutes of home location.

Figure 5. Histogram of yearly admissions to hospitals. The histogram shows the distribution of admissions across 93 configurations in which annual admissions were kept within 600-2,000 for all units.

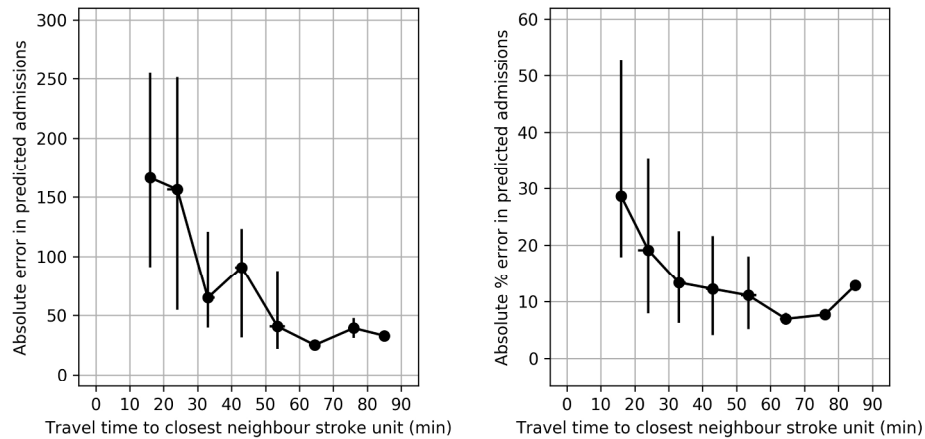

Figure 1. Error in predicting admissions (as recorded in SSNAP) grouped by proximity to the closest neighbouring acute stroke unit (10 minute bins). Points show median with error bars indicating inter-quartile range. The left panel shows the absolute error in predicting admission numbers per year, the right panel shows the absolute error as a percentage of actual admissions for each unit.

215x114mm (300 x 300 DPI)

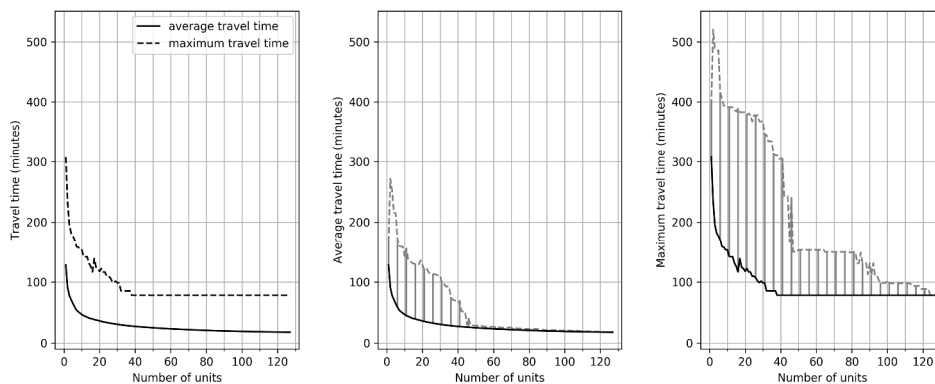

Figure 2. The effect of changing the number of acute stroke units on average and maximum travel times. The left panel shows the best average and maximum travel times achieved by the algorithm. The middle panel shows average travel times. The bold line represents the best result identified in any scenario. The dotted line shows the worst result identified for a non-dominated solution. The shaded area represents the effective region of trade-off between average travel time and other optimisation parameters. The right panel repeats these results for maximum travel time.

317x139mm (300 x 300 DPI)

Review only



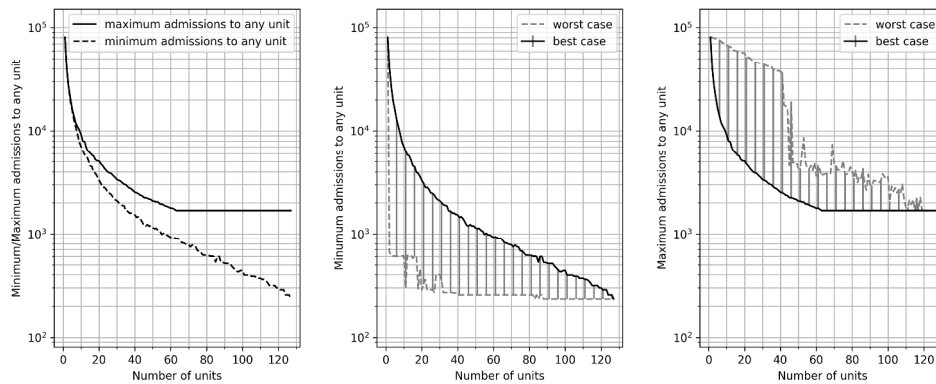

Figure 3. The effect of changing the number of acute stroke units on minimum and maximum admissions to any single unit. The left panel shows the best admissions identified by the algorithm (it is better to have a higher minimum number of admissions and lower maximum admissions; that is the smallest hospital should be as large as possible, and the largest hospital as small as possible). The middle panel shows minimum admission numbers (to the smallest unit in each scenario). The bold line represents the best result identified in any scenario. The dotted line shows the worst result identified for a non-dominated solution. The shaded area represents the effective region of trade-off between average minimum admissions and other optimisation parameters. The right panel repeats these results for maximum admissions in a scenario.

317x139mm (300 x 300 DPI)

1  
2  
3  
4  
5  
6  
7  
8  
9  
10  
11  
12  
13  
14  
15  
16  
17  
18  
19  
20  
21  
22  
23  
24  
25  
26  
27  
28  
29  
30  
31  
32  
33  
34  
35  
36  
37  
38  
39  
40  
41  
42  
43  
44  
45  
46  
47  
48  
49  
50  
51  
52  
53  
54  
55  
56  
57  
58  
59  
60

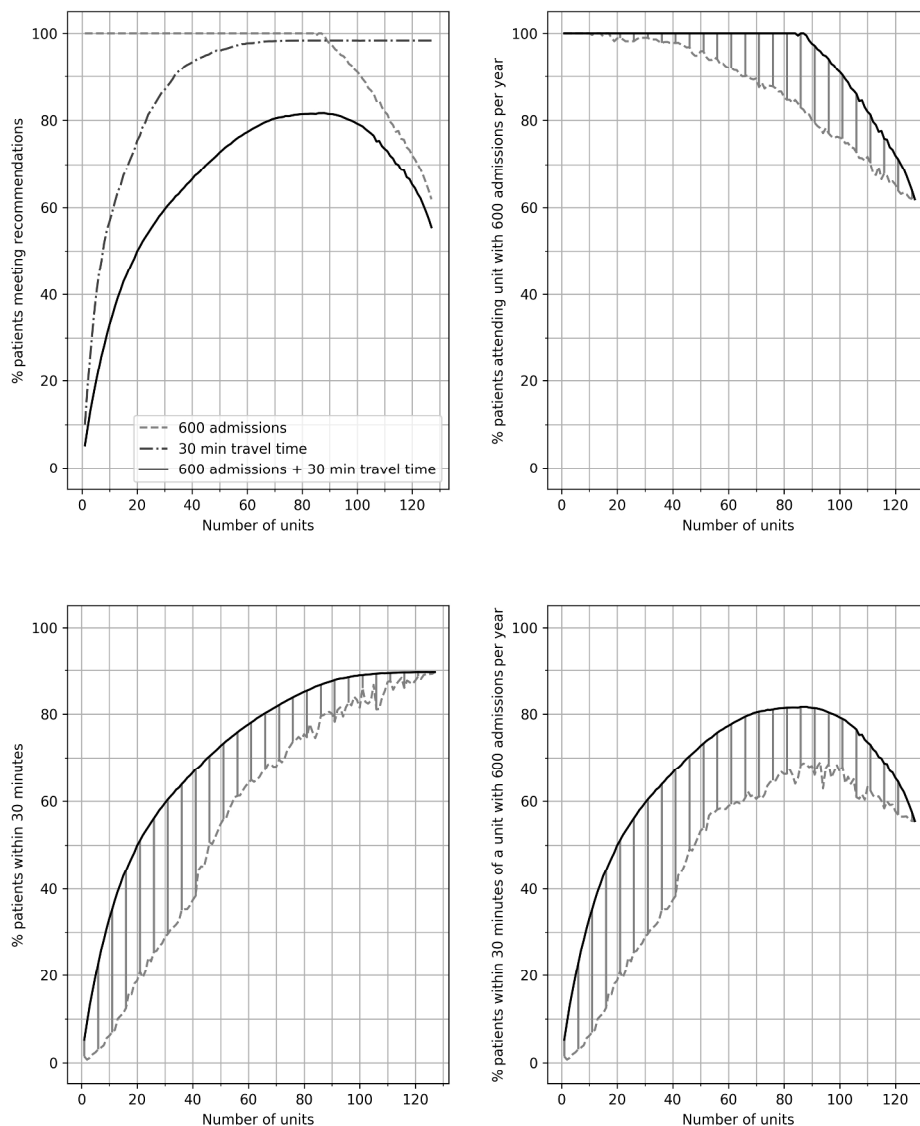

Figure 4. The effect of changing the number of acute stroke units on the proportion of patients attending a unit with 600 admissions per year, the proportion of patients attending a unit within 30 minutes of home location and the proportion of patients attending a unit with 600 admissions per year and within 30 minutes of home location. The top left panel shows the best solutions for each identified by the algorithms. The top right panels shows the proportion of patients attending a unit with 600 admissions per year. The bold line represents the best result identified in any scenario. The dotted line shows the worst result identified for a non-dominated solution. The shaded area represents the effective region of trade-off between attending a unit with target admission numbers and other optimisation parameters. The bottom two panels repeat the analysis for the proportion of patients attending a unit within 30 minutes of home location and the proportion of patients attending a unit with 600 admissions per year and within 30 minutes of home location.

254x304mm (300 x 300 DPI)

1  
2  
3  
4  
5  
6  
7  
8  
9  
10  
11  
12  
13  
14  
15  
16  
17  
18  
19  
20  
21  
22  
23  
24  
25  
26  
27  
28  
29  
30  
31  
32  
33  
34  
35  
36  
37  
38  
39  
40  
41  
42  
43  
44  
45  
46  
47  
48  
49  
50  
51  
52  
53  
54  
55  
56  
57  
58  
59  
60

For peer review only

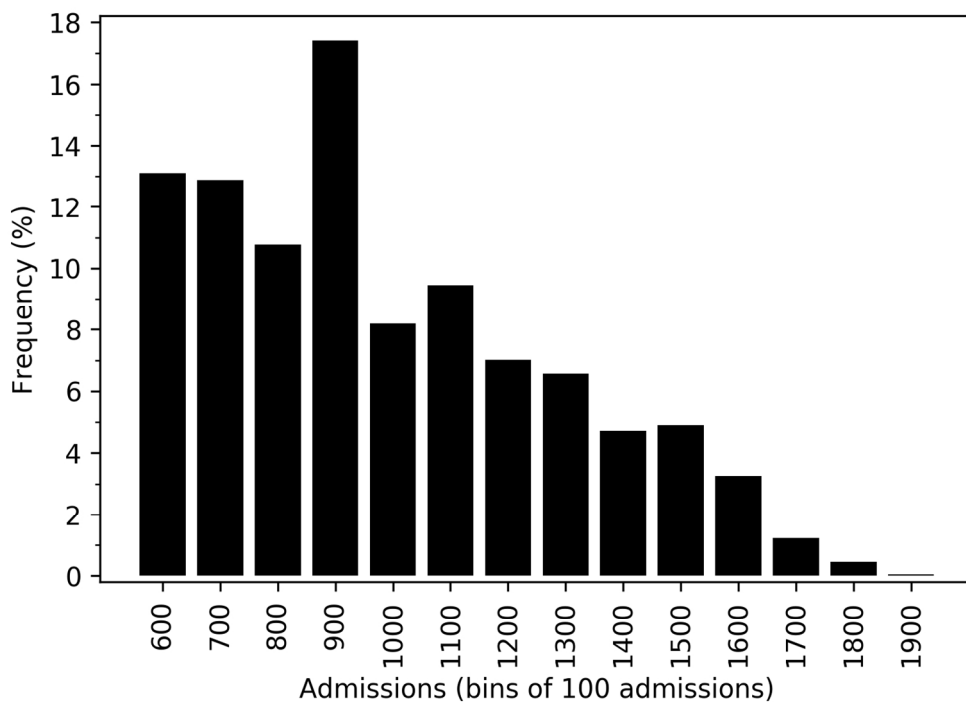

Figure 5. Histogram of yearly admissions to hospitals. The histogram shows the distribution of admissions across 93 configurations in which annual admissions were kept within 600-2,000 for all units.

135x98mm (300 x 300 DPI)

ew only

# Appendix

## 1 Description of problem

In order to establish a hyper-acute stroke unit (HASU) model for emergency stroke care across England, all HASUs should have a minimum of 6,000 yearly admissions of confirmed strokes. No unit should be infeasibly large (and we have taken the current largest unit with ~2,000 stroke admissions per year as our upper target). All patients are expected to be taken to their closest HASU, with 'closest' chosen by estimated road travel times.

The problem involves looking for solutions that can place any number of hospitals in any of 127 locations. There are therefore  $2^{127}$  or  $10^{38}$  possible solutions. Each solution requires looking up road travel times from each of 31,171 patient locations to all open hospitals to allocate patients to their closest hospital. There are 13 possible objectives to achieve or trade-off (see section 3.1).

This type of problem is termed 'NP-hard' - it cannot be solved explicitly in reasonable time. And as there are multiple-objectives that trade-off against each other there is no single solution to the problem (as there is no way to objectively determine the weighting of different objectives); rather we are looking for a population of solutions which demonstrate the trade-off between different objectives.

With NP-hard problems there are often a range of different heuristic algorithms which search for good solutions to the problem, while never guaranteeing an optimal solution is found. One set of general purpose heuristic methods are a family of algorithms known as 'genetic algorithms', due to their inspiration coming from the theory of evolution. Here we describe the specific genetic algorithm used in our study.

## 2 Code and data repository

Data and code used for the model are available at:  
[https://github.com/MichaelAllen1966/stroke\\_unit\\_location](https://github.com/MichaelAllen1966/stroke_unit_location)

Note: The code contains a bespoke Genetic Algorithm written in Python/NumPy. No Genetic Algorithm libraries were used.

## 3 Multi-objective problem

### 3.1 Pareto dominance

When solving an optimisation problem based on one objective, the optimal solution is given by the configuration with the best (highest or lowest) objective value. In the case of multi-objective optimisation, comparing several solutions requires reference to the notion of dominance: a vector  $a$  of the objective space dominates another vector  $b$  if all criteria of  $a$  are better or equal to criteria of  $b$  and  $a \neq b$ [1]. Then, a solution is non-dominated if there are no other solutions at least equal in all objectives and better in at least one objective. At the end of the optimisation process, there is no

single best solution but a set of non-dominated solutions, called the Pareto Front. An example of a Pareto Front using two objectives is shown in figure 1.

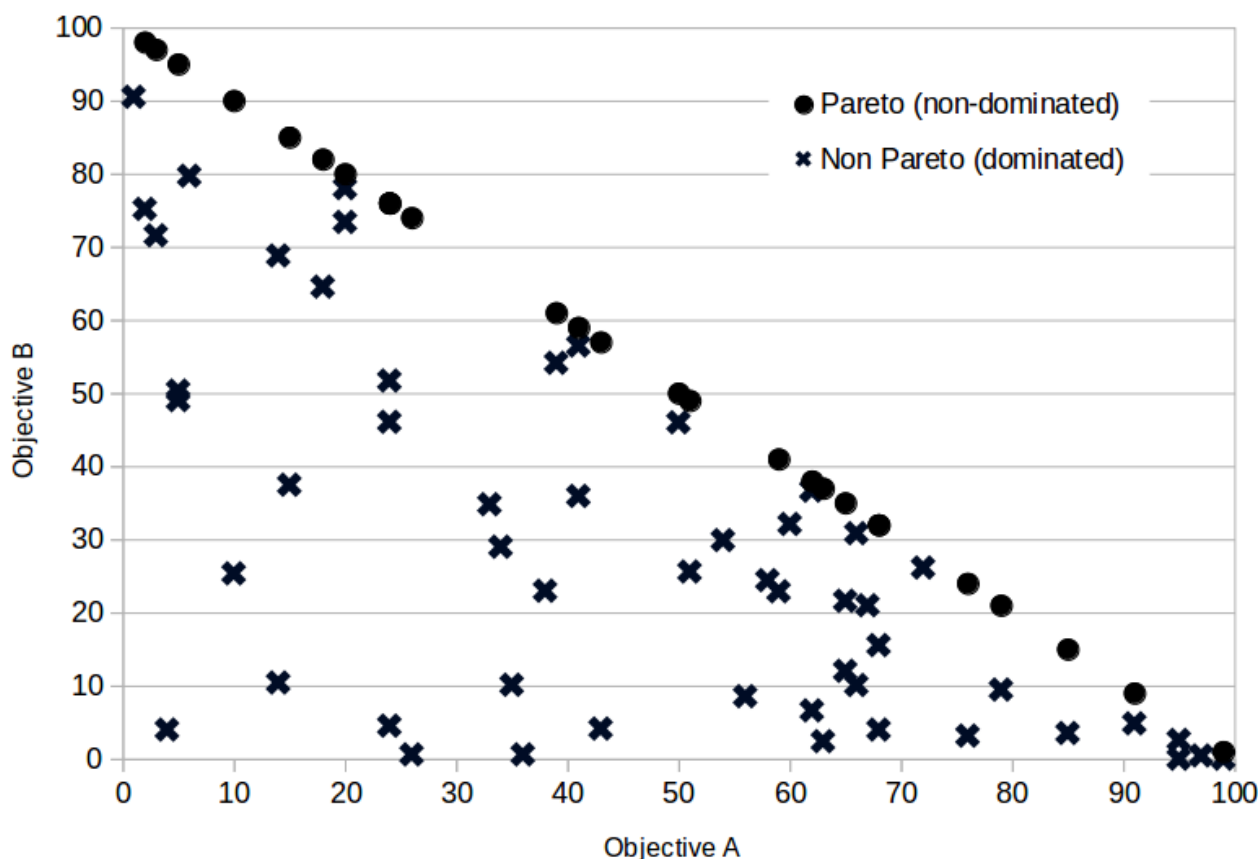

Figure 1: Example of identification of Pareto front (non-dominated) points when comparing two objectives.

The greater the number of objectives on the Pareto Front the lower the chance that a point will be dominated by another. If there is no correlation between objectives and solutions are entirely random then the chance of a single point being dominated by another single point picked at random is  $0.5^{n_{obj}}$ .

### 3.2 Algorithm objectives

The objectives which could be used to select solutions were:

- 1: Number of hospitals (lower is better)
- 2: Average travel time (lower is better)
- 3: Maximum travel time (lower is better)
- 4: Maximum admissions to any one hospital (lower is better)
- 5: Minimum admissions to any one hospital (higher is better)
- 6: Max/Min admissions ratio (lower is better)
- 7: Proportion patients within estimated 30 min travel distance (higher is better)
- 8: Proportion patients within estimated 45 min travel distance time (higher is better)

1  
2 9: Proportion patients within estimated 60 min travel distance time (higher is better)

3  
4 10: Proportion patients attending unit with target admission numbers (higher is better)

5  
6 11: Proportion patients attending unit with target admission numbers and within estimated  
7 30 min travel time (higher is better)

8  
9 12: Proportion patients attending unit with target admission numbers and within estimated  
10 45 min travel time (higher is better)

11  
12 13: Proportion patients attending unit with target admission numbers and within estimated  
13 60 min travel time (higher is better)

14  
15  
16 Attempting to optimise on all 13 objectives simultaneously produces slow progress. Optimisation  
17 on fewer key objectives led to more rapid progress to solutions; these individual solution sets may  
18 then be combined and used as a seed for runs with larger numbers of objectives (providing a  
19 broader spread of solutions). This progressive extension of objectives is an established general  
20 methodology for genetic algorithms [2].  
21  
22

23  
24 The initial restricted objective runs (focussed on key conflicting priorities) used the following sets  
25 of objectives, each of which were aimed at focussing on key trade-offs:  
26

- 27  
28 • 1,2,3  
29  
30 • 1,4,5  
31  
32 • 7,10,11  
33  
34 • 8,10,12  
35  
36 • 4,5,7,10,11  
37  
38 • 4,5,8,10,12  
39  
40 • 1,2,4,5,7,10,11  
41  
42 • 1,2,4,5,8,10,12

43  
44 The advantage of the smaller objective sets is that the chance of Pareto dominance is greater (see  
45 section 3.1), leading to greater selection pressures in the algorithm. As an example when starting  
46 with a random population of 10,000 solutions the proportion of solutions in the first generation (the  
47 randomly chosen generation) that were on the Pareto Front were as follows:  
48

49  
50 All objectives: Mean 3,295 solutions on Pareto Front (SD =115, n=5)

51  
52 3 Objectives (8,10,12): Mean 49 solutions on Pareto Front (SD =7, n=5)

53  
54 Solutions identified from restricted objective runs were combined with solutions identified with  
55 runs based on all objectives and were combined into a single Pareto Front. This was used as a seed  
56 population for a run based on all objectives.  
57  
58  
59  
60

## 4 Genetic algorithms

Genetic algorithms manage a population of individuals encoded as vectors through a given number of generations. At each generation, 'good' parents are selected from the population according to their fitness (any measure of superiority over other potential parents). Parents are then combined, using a cross-over operator, to create children which are finally mutated. Genetic algorithms differ in the parent selection process, in the cross-over and mutation processes, and in the way the population is archived.

### 4.1 Representation

Solutions are coded as binary string of genes with either 1 for an open location or 0 for closed. For instance, 001011 would be six genes that represent hospitals 3, 5 and 6 being open and 1, 2 and 4 being closed. In this study, vectors represent the 127 hospitals (SSNAP acute admitting stroke units).

### 4.2 Selection

The selection operator chooses a part of the population to become parents. The better individuals in terms of objective values are more likely to become parents. The selection probability can be proportionate to fitness by roulette-wheel sampling[3] or stochastic universal sampling[4]. The sigma scaling method normalises the fitness by its variance in the population, so that the individuals with the highest fitness always have a higher probability than others to produce children. However, these approaches focus on exploitation of existing population rather than exploration of the decision space and they can lead to premature convergence.

Other selection methods rely on ranking rather than fitness value. With ranking selection, individuals are ranked according to their fitness and their probability to become parents is function of their rank[5]. Similarly, the tournament selection creates random pairs of individuals and keeps the one with the highest fitness value with a given probability[3]. Such methods allow the algorithm to keep some individuals with low fitness values (with the advantage of keeping a broader gene pool).

Finally, the Boltzmann selection[6] controls the selection rate via a temperature. At the beginning, all individuals have a similar probability to be selected. As the temperature decreases, the selection focusses on high-fitness individuals.

### 4.3 Cross-over

The cross-over is the process which exchanges genes from parents to create new children. The simplest option is the single-point cross-over which selects one locus and exchanges the blocks of parents before and after that locus. For instance, a crossover at point five would perform the following:

Parent A: 1 1 1 1 1 1

Parent B: 0 0 0 0 0 0



1  
2 Child A: = 1 1 1 1 0 0

3  
4 Child B: 0 0 0 0 1 1

5  
6 The choice of the single-point location can be made by a uniform distribution. In the case of binary  
7 vectors, the single-point cross-over is less likely to exchange the endpoints of vectors [2]. To reduce  
8 this effect, the cross-over can rely on two or more exchange points.  
9

## 10 11 12 **4.4 Mutation**

13  
14 Mutation changes the gene value of each locus, with a very small probability for each individual  
15 each generation. According to [7], the mutation process avoids the loss of diversity in the  
16 population.  
17

## 18 19 20 **4.5 Archive**

21  
22 Genetic algorithms also vary by the way solutions are archived and if the population size is  
23 variable. The simple option is to keep only children. However, it assumes that children are better  
24 than parents which are lost. Several methods build an archive which is union of parents and  
25 children. If the population size is variable, an option is to keep the Pareto Front of this archive.  
26 However, the size of this Pareto Front can increase dramatically, in particular with many objective  
27 functions. Then, individuals from the archive are ranked, based on their Pareto dominance and  
28 another metric. NSGA-II [8] and SPEA2 [9] both rank individuals by combining dominance and  
29 spread metric in order to maximise population diversity.  
30  
31  
32

## 33 34 35 **4.6 The NSGA-II method**

36  
37 In NSGA-II [8] the archive and the new population are merged and all individuals are ranked  
38 according to a two-step mechanism. In the first step, the merged population is split into layers of  
39 non-dominated fronts, the first layer being the Pareto Front (the second layer being the next Pareto  
40 Front after removal of the first layer). In the second step, the spread of the population is measured  
41 by the crowding distance which gives the distance from an individual to its nearest neighbour. To  
42 keep the size of the population constant, a given number of individuals is selected from the merged  
43 population, preferably from the upper layers and with the largest crowding distance.  
44  
45  
46

47  
48 NSGA-II has the advantage to keep not only optimal solutions but also near-optimal solutions in  
49 lower layers. However, to do so, the population must be large enough. The second advantage is to  
50 provide a diverse population in terms of score values, thanks to the crowding distance ranking.  
51

52  
53 The NSGA-II was chosen for this study after a pilot comparison with SPEA2[9], MOEAD[10], and  
54 HypE[11] which showed that NSGA-II provided similar objective performances with a more  
55 diverse population.  
56

## 57 58 59 **4.7 Convergence indicator**

60  
Population diversity can be monitored using average Hamming distance. The Hamming distance  
between any two solutions is the proportion of genes that are different. Average Hamming distance

1  
2 is the mean Hamming distances for all pairwise comparisons in the population (after first Pareto  
3 Front selection).  
4

## 5 6 7 **4.8 Description of our genetic algorithm**

8 The Genetic Algorithm used for this study was based on NSGA-II[8]. Our method evolves solutions  
9 based on multiple objectives, but without any weighting of objectives. In each generation, the  
10 Pareto Front of non-dominated solutions is identified. Larger populations may be selected by  
11 picking subsequent Pareto Fronts (re-evaluation the Pareto Front after removal of the previous  
12 Pareto Front identified). The population size is maintained in the interval  $[P_{min}; P_{max}]$ .  
13  
14  
15

16 The steps of the algorithm are:

- 17  
18 1) Identify which combination of objectives to use for selection in algorithm (may be from 2  
19 objectives to all objectives).  
20
- 21  
22 2) Set up initial population of solutions (a typical starting population is 10,000 solutions).  
23
  - 24 i) Randomly choose number of hospitals to open in each solution.
  - 25 ii) Randomly assign open hospitals.
  - 26 iii) A library of solutions may be imported instead of, or in addition to, a random  
27 population of solutions.
  - 28 iv) Non-unique solutions are removed.  
29
- 30  
31 3) Breed solutions:  
32
  - 33 i) Choose pairs of solutions at random from the population.  
34  
35 While NSGA-II selects parents with the tournament method based on weighted  
36 criteria, our method selects parents randomly to avoid weighting any objective.  
37  
38 ii) Select a single crossover point at random within the solution binary string.  
39  
40 iii) Apply the cross-over operator to produce children.  
41  
42 iv) Randomly mutate children with a probability per element of 0.002.  
43  
44 v) Combine parents and children into a new population.  
45  
46 vi) Remove non-unique solutions and any solutions where all hospitals are closed.  
47  
48  
49
- 50  
51 4) Calculate the performance of all solutions against the objectives used for selection.  
52
- 53  
54 5) Identify all non-dominated (Pareto Front) solutions  
55
  - 56 i) If the number of selected solutions is greater than the maximum permitted  
57 population size then reduce the number of solutions by either  
58  
59 (1) picking the required number of solutions at random, or  
60  
61 (2) pick two solutions at random and use tournament selection based on  
62 crowding distance

1  
2 ii) If the number of selected solutions is lower than the target population then remove  
3 the previously selected non-dominated solutions and repeat the Pareto selection until  
4 sufficient solutions have been identified.  
5

6  
7 6) Repeat steps 3-5 until the maximum number of generations is reached or the algorithm is  
8 stopped by another indicator:  
9

10 i) Stop the algorithm when there is a change of  $<0.001$  in average Hamming  
11 distance across 5 generations.  
12

13  
14 Note: The minimum and maximum number of solutions to pass on to the next generation may be  
15 the same number to keep solution size constant. Alternatively, a range of population size may be  
16 acceptable (e.g. a minimum number of 1,000 solutions may be chosen, but a maximum number of  
17 5,000 solutions may be permitted. In this case Pareto selection is repeated until at least 1,000  
18 solutions have been selected, but restriction on the number of solutions only occurs if the number of  
19 solutions chosen exceeds 5,000).  
20  
21

22  
23 The time taken to reach convergence depended on the the number of objectives in the Pareto Front.  
24 Typical populations sizes and run times were:  
25

- 26 • For 3-4 objectives: population sizes of 2,500 to 5,000 were used. Typical run time to  
27 convergence on a single core of a 2GHz processor was 48hrs.  
28
- 29 • For 8-12 objectives: population sizes of 5,00 to 10,000 were used. Typical run time to  
30 convergence on a single core of a 2GHz processor was 4-7 days.  
31  
32

33 Note: algorithms may be speeded up by restricting solutions to a smaller range of acceptable  
34 number of hospitals (strict filters may be introduced into the algorithm to remove unacceptable  
35 solutions before identifying the Pareto Front).  
36  
37  
38

## 39 5 References

- 40  
41  
42  
43 1 Zhou A, Qu B-Y, Li H, *et al.* Multiobjective evolutionary algorithms: A survey of the state of  
44 the art. *Swarm Evol Comput* 2011;**1**:32–49. doi:10.1016/j.swevo.2011.03.001  
45  
46 2 Mitchell M. An introduction to genetic algorithms. *Comput Math with Appl* 1996;**32**:133.  
47 doi:10.1016/S0898-1221(96)90227-8  
48  
49 3 Goldberg DE. *Genetic Algorithms in Search, Optimization, and Machine Learning*. 1989.  
50 doi:10.1007/s10589-009-9261-6  
51  
52 4 Baker JE. Reducing bias and inefficiency in the selection algorithm. *Proc Second Int Conf*  
53 *Genet Algorithms Genet algorithms their Appl* 1987;;14–21.  
54  
55 5 Baker JE. Adaptive selection methods for genetic algorithms. *Proc an Int Conf Genet*  
56 *Algorithms their Appl* 1985;;101–11.  
57  
58  
59  
60

- 1  
2  
3  
4  
5  
6  
7  
8  
9  
10  
11  
12  
13  
14  
15  
16  
17  
18  
19  
20  
21  
22  
23  
24  
25  
26  
27  
28  
29  
30  
31  
32  
33  
34  
35  
36  
37  
38  
39  
40  
41  
42  
43  
44  
45  
46  
47  
48  
49  
50  
51  
52  
53  
54  
55  
56  
57  
58  
59  
60
- 6 Maza MDA, Tidor B. An analysis of selection procedures with particular attention paid to proportional and Boltzmann selection. *Proc 5th Int Conf Genet Algorithms* 1993;:124–31.
- 7 Holland JH. *Adaptation in Natural and Artificial Systems: An introductory Analysis with Applications to Biology, Control and Artificial Intelligence*. 1975. doi:10.1137/1018105
- 8 Deb K, Pratap A, Agarwal S, et al. A fast and elitist multiobjective genetic algorithm: NSGA-II. *IEEE Trans Evol Comput* 2002;**6**:182–97. doi:10.1109/4235.996017
- 9 Zitzler E, Laumanns M, Thiele L. SPEA2: Improving the Strength Pareto Evolutionary Algorithm. *Evol Methods Des Optim Control with Appl to Ind Probl* 2001;:95–100. doi:10.1.1.28.7571
- 10 Zhang Q, Li H. MOEA/D: A multiobjective evolutionary algorithm based on decomposition. *IEEE Trans Evol Comput* 2007;**11**:712–31. doi:10.1109/TEVC.2007.892759
- 11 Bader J, Zitzler E. HypE: An Algorithm for Fast Hypervolume-Based Many-Objective Optimization. *Evol Comput* 2011;**19**:45–76. doi:10.1162/EVCO\_a\_00009

STROBE Statement—checklist of items that should be included in reports of observational studies

Please note: The document was written in an Open Office format and saved as a Word document. The page numbers may vary by 1 page depending on the system used to open or process the paper. I've added more detail to the 'Page No. to allow further identification.

|                           | Item No. | Recommendation                                                                                      | Page No.                   | Relevant text from manuscript                                                                                                                                                                                                    |
|---------------------------|----------|-----------------------------------------------------------------------------------------------------|----------------------------|----------------------------------------------------------------------------------------------------------------------------------------------------------------------------------------------------------------------------------|
| <b>Title and abstract</b> | 1        | (a) Indicate the study's design with a commonly used term in the title or the abstract              | 1 (Title)                  | Feasibility of a hyper-acute stroke unit model of care across England. A modelling analysis                                                                                                                                      |
|                           |          | (b) Provide in the abstract an informative and balanced summary of what was done and what was found | 3 (Abstract)               |                                                                                                                                                                                                                                  |
|                           |          |                                                                                                     | and<br>4 (Article Summary) |                                                                                                                                                                                                                                  |
| <b>Introduction</b>       |          |                                                                                                     |                            |                                                                                                                                                                                                                                  |
| Background/rationale      | 2        | Explain the scientific background and rationale for the investigation being reported                | 5 (Intro para 2)           | Guidelines recommend a minimum number of admissions to a HASU of 600 patients per year, and NHS England reconfiguration guidelines also suggest 'travel time should be ideally 30 minutes but no more than 60 minutes            |
| Objectives                | 3        | State specific objectives, including any prespecified hypotheses                                    | 5 (Intro para 3)           | We therefore sought to investigate the potential for meeting the dual objectives of all patients with acute stroke being admitted to a HASU of sufficient size (at least 600 acute stroke patients per year) and that unit being |

within 30 minutes travel time.

## Methods

|              |   |                                                                                                                                                                                                                                                                                                                                                                                                                                                                                                                                                                                                                                                                                              |                                                                                   |                                                                                                                                                                                                                                                                                                     |
|--------------|---|----------------------------------------------------------------------------------------------------------------------------------------------------------------------------------------------------------------------------------------------------------------------------------------------------------------------------------------------------------------------------------------------------------------------------------------------------------------------------------------------------------------------------------------------------------------------------------------------------------------------------------------------------------------------------------------------|-----------------------------------------------------------------------------------|-----------------------------------------------------------------------------------------------------------------------------------------------------------------------------------------------------------------------------------------------------------------------------------------------------|
| Study design | 4 | Present key elements of study design early in the paper                                                                                                                                                                                                                                                                                                                                                                                                                                                                                                                                                                                                                                      | 6 (Methods para 2)                                                                | The model predicts, for any configuration of HASUs, the travel times (fastest road travel time chosen, from home location of patient to hospital with the shortest estimated travel time), and the number of admissions to each HASU. A genetic algorithm was used to identify good configurations. |
| Setting      | 5 | Describe the setting, locations, and relevant dates, including periods of recruitment, exposure, follow-up, and data collection                                                                                                                                                                                                                                                                                                                                                                                                                                                                                                                                                              | 6 (Methods para 3)<br>Note: this is a modelling study using secondary data only.  | We included 238,887 patients coded with ischaemic or haemorrhagic stroke (ICD-10 I61, I63, I64) with an emergency admission over a three-year period (2013-2015). Stroke admission numbers were counts of admissions for each of 31,771 Lower Super Output Areas (LSOAs) in England.                |
| Participants | 6 | <p>(a) <i>Cohort study</i>—Give the eligibility criteria, and the sources and methods of selection of participants. Describe methods of follow-up</p> <p><i>Case-control study</i>—Give the eligibility criteria, and the sources and methods of case ascertainment and control selection. Give the rationale for the choice of cases and controls</p> <p><i>Cross-sectional study</i>—Give the eligibility criteria, and the sources and methods of selection of participants</p> <hr/> <p>(b) <i>Cohort study</i>—For matched studies, give matching criteria and number of exposed and unexposed</p> <p><i>Case-control study</i>—For matched studies, give matching criteria and the</p> | 6 (Methods para 3).<br>Note: this is a modelling study using secondary data only. | We included 238,887 patients coded with ischaemic or haemorrhagic stroke (ICD-10 I61, I63, I64) with an emergency admission over a three-year period (2013-2015). Stroke admission numbers were counts of admissions for each of 31,771 Lower Super Output Areas (LSOAs) in England.                |

1  
2  
3  
4  
5  
6  
7  
8  
9  
10  
11  
12  
13  
14  
15  
16  
17  
18  
19  
20  
21  
22  
23  
24  
25  
26  
27  
28  
29  
30  
31  
32  
33  
34  
35  
36  
37  
38  
39  
40  
41  
42  
43  
44  
45  
46  
47  
48  
49

---

number of controls per case

---

|           |   |                                                                                                                                          |                                                                                   |                                                                                                                                                                                                                                                                                                     |
|-----------|---|------------------------------------------------------------------------------------------------------------------------------------------|-----------------------------------------------------------------------------------|-----------------------------------------------------------------------------------------------------------------------------------------------------------------------------------------------------------------------------------------------------------------------------------------------------|
| Variables | 7 | Clearly define all outcomes, exposures, predictors, potential confounders, and effect modifiers. Give diagnostic criteria, if applicable | 6 (Methods Para 1).<br>Note: this is a modelling study using secondary data only. | The model predicts, for any configuration of HASUs, the travel times (fastest road travel time chosen, from home location of patient to hospital with the shortest estimated travel time), and the number of admissions to each HASU. A genetic algorithm was used to identify good configurations. |
|-----------|---|------------------------------------------------------------------------------------------------------------------------------------------|-----------------------------------------------------------------------------------|-----------------------------------------------------------------------------------------------------------------------------------------------------------------------------------------------------------------------------------------------------------------------------------------------------|

|                              |    |                                                                                                                                                                                      |                    |                                                                                                                                                                                                                                                                                                                                                                                                                                                                                                          |
|------------------------------|----|--------------------------------------------------------------------------------------------------------------------------------------------------------------------------------------|--------------------|----------------------------------------------------------------------------------------------------------------------------------------------------------------------------------------------------------------------------------------------------------------------------------------------------------------------------------------------------------------------------------------------------------------------------------------------------------------------------------------------------------|
| Data sources/<br>measurement | 8* | For each variable of interest, give sources of data and details of methods of assessment (measurement). Describe comparability of assessment methods if there is more than one group | 6 (Methods para 3) | No individual patient level data was accessed: counts of admissions per LSOA were extracted from Hospital Episode Statistics (HES; <a href="http://www.hscic.gov.uk/hes">http://www.hscic.gov.uk/hes</a> ) with access to national HES data managed through Lightfoot Solutions ( <a href="http://www.lightfootsolutions.com/">http://www.lightfootsolutions.com/</a> ). Estimated fastest road travel times were obtained from a geographic information system (Maptitude, with MP-MileCharter add-in). |
|------------------------------|----|--------------------------------------------------------------------------------------------------------------------------------------------------------------------------------------|--------------------|----------------------------------------------------------------------------------------------------------------------------------------------------------------------------------------------------------------------------------------------------------------------------------------------------------------------------------------------------------------------------------------------------------------------------------------------------------------------------------------------------------|

|      |   |                                                           |                                                           |  |
|------|---|-----------------------------------------------------------|-----------------------------------------------------------|--|
| Bias | 9 | Describe any efforts to address potential sources of bias | NA (all confirmed stroke admissions included in analysis) |  |
|------|---|-----------------------------------------------------------|-----------------------------------------------------------|--|

|            |    |                                           |                                                                                                |  |
|------------|----|-------------------------------------------|------------------------------------------------------------------------------------------------|--|
| Study size | 10 | Explain how the study size was arrived at | No sampling. All patients with confirmed stroke admitted in England over a 3 year period used. |  |
|------------|----|-------------------------------------------|------------------------------------------------------------------------------------------------|--|

---

Continued on next page

|                        |     |                                                                                                                              |                                                                                                                         |                                                                                                                                                                                                                                                                                                                                                                                                                                      |
|------------------------|-----|------------------------------------------------------------------------------------------------------------------------------|-------------------------------------------------------------------------------------------------------------------------|--------------------------------------------------------------------------------------------------------------------------------------------------------------------------------------------------------------------------------------------------------------------------------------------------------------------------------------------------------------------------------------------------------------------------------------|
| Quantitative variables | 11  | Explain how quantitative variables were handled in the analyses. If applicable, describe which groupings were chosen and why | Not applicable to this modelling study                                                                                  |                                                                                                                                                                                                                                                                                                                                                                                                                                      |
| Statistical methods    | 12  | (a) Describe all statistical methods, including those used to control for confounding                                        | Not applicable to this modelling study                                                                                  |                                                                                                                                                                                                                                                                                                                                                                                                                                      |
|                        |     | (b) Describe any methods used to examine subgroups and interactions                                                          | No subgroups                                                                                                            |                                                                                                                                                                                                                                                                                                                                                                                                                                      |
|                        |     | (c) Explain how missing data were addressed                                                                                  | No missing data by definition of inclusions (all HES episodes with a primary diagnosis of stroke)                       |                                                                                                                                                                                                                                                                                                                                                                                                                                      |
|                        |     | (d) <i>Cohort study</i> —If applicable, explain how loss to follow-up was addressed                                          | Not applicable: No follow up (modelling study only)                                                                     |                                                                                                                                                                                                                                                                                                                                                                                                                                      |
|                        |     | <i>Case-control study</i> —If applicable, explain how matching of cases and controls was addressed                           |                                                                                                                         |                                                                                                                                                                                                                                                                                                                                                                                                                                      |
|                        |     | <i>Cross-sectional study</i> —If applicable, describe analytical methods taking account of sampling strategy                 |                                                                                                                         |                                                                                                                                                                                                                                                                                                                                                                                                                                      |
|                        |     | (e) Describe any sensitivity analyses                                                                                        | Page 9 (Discussion Para 3): discussion of potential impact of ageing population (but not a formal sensitivity analysis) | With an ageing population, however, we anticipate a steady increase in admissions to hospital with disabling stroke despite better preventative care, particularly in stroke related to atrial fibrillation[27]. Although such forecasting is imprecise, a potential increase in stroke incidence and hospital admissions could be driven by a predicted 54% increase in the population of England aged 75 or over the next 15 years |
| <b>Results</b>         |     |                                                                                                                              |                                                                                                                         |                                                                                                                                                                                                                                                                                                                                                                                                                                      |
| Participants           | 13* | (a) Report numbers of individuals at each stage of study—eg numbers potentially eligible, examined                           | Page 6                                                                                                                  | We included 238,887 patients                                                                                                                                                                                                                                                                                                                                                                                                         |



|                  |     |                                                                                                                                                                                                              |                                                                                   |                                                                                                                                                                   |
|------------------|-----|--------------------------------------------------------------------------------------------------------------------------------------------------------------------------------------------------------------|-----------------------------------------------------------------------------------|-------------------------------------------------------------------------------------------------------------------------------------------------------------------|
|                  |     | for eligibility, confirmed eligible, included in the study, completing follow-up, and analysed                                                                                                               | (Methods para 2)                                                                  | coded with ischaemic or haemorrhagic stroke (ICD-10 I61, I63, I64) with an emergency admission over a three-year period (2013-2015).                              |
|                  |     | (b) Give reasons for non-participation at each stage                                                                                                                                                         | Not applicable                                                                    |                                                                                                                                                                   |
|                  |     | (c) Consider use of a flow diagram                                                                                                                                                                           | Not applicable as not a trial                                                     |                                                                                                                                                                   |
| Descriptive data | 14* | (a) Give characteristics of study participants (eg demographic, clinical, social) and information on exposures and potential confounders                                                                     | Not applicable as modelling study used all emergency stroke admissions in England |                                                                                                                                                                   |
|                  |     | (b) Indicate number of participants with missing data for each variable of interest                                                                                                                          | Page 6 (Methods para 2)                                                           | We included 238,887 patients coded with ischaemic or haemorrhagic stroke (ICD-10 I61, I63, I64) with an emergency admission over a three-year period (2013-2015). |
|                  |     | (c) Cohort study—Summarise follow-up time (eg, average and total amount)                                                                                                                                     | Not applicable;e: no follow up                                                    |                                                                                                                                                                   |
| Outcome data     | 15* | Cohort study—Report numbers of outcome events or summary measures over time                                                                                                                                  | Not applicable; not a trial with outcomes                                         |                                                                                                                                                                   |
|                  |     | Case-control study—Report numbers in each exposure category, or summary measures of exposure                                                                                                                 |                                                                                   |                                                                                                                                                                   |
|                  |     | Cross-sectional study—Report numbers of outcome events or summary measures                                                                                                                                   |                                                                                   |                                                                                                                                                                   |
| Main results     | 16  | (a) Give unadjusted estimates and, if applicable, confounder-adjusted estimates and their precision (eg, 95% confidence interval). Make clear which confounders were adjusted for and why they were included | Not applicable; not using sampling                                                |                                                                                                                                                                   |
|                  |     | (b) Report category boundaries when continuous variables were categorized                                                                                                                                    | Not applicable                                                                    |                                                                                                                                                                   |
|                  |     | (c) If relevant, consider translating estimates of relative risk into absolute risk for a meaningful time period                                                                                             | Not applicable                                                                    |                                                                                                                                                                   |

1  
2  
3  
4  
5  
6  
7  
8  
9  
10  
11  
12  
13  
14  
15  
16  
17  
18  
19  
20  
21  
22  
23  
24  
25  
26  
27  
28  
29  
30  
31  
32  
33  
34  
35  
36  
37  
38  
39  
40  
41  
42  
43  
44  
45  
46  
47  
48  
49

Continued on next page

For peer review only

1  
2  
3  
4  
5  
6  
7  
8  
9  
10  
11  
12  
13  
14  
15  
16  
17  
18  
19  
20  
21  
22  
23  
24  
25  
26  
27  
28  
29  
30  
31  
32  
33  
34  
35  
36  
37  
38  
39  
40  
41  
42  
43  
44  
45  
46  
47  
48  
49

---

|                |    |                                                                                                |                                                                                                   |                                                                                      |
|----------------|----|------------------------------------------------------------------------------------------------|---------------------------------------------------------------------------------------------------|--------------------------------------------------------------------------------------|
| Other analyses | 17 | Report other analyses done—eg analyses of subgroups and interactions, and sensitivity analyses | Page 7 (Results para 2 et seq). Analysis is on predicted travel times and admissions to hospitals | With an increasing number of HASUs, average and maximum road travel times reduce.... |
|----------------|----|------------------------------------------------------------------------------------------------|---------------------------------------------------------------------------------------------------|--------------------------------------------------------------------------------------|

---

**Discussion**

---

|             |    |                                                          |                            |                                                                                                                                                                                                                                                                                                                                                                                                                                                                                                                                                                                                                                                                                                                                                                      |
|-------------|----|----------------------------------------------------------|----------------------------|----------------------------------------------------------------------------------------------------------------------------------------------------------------------------------------------------------------------------------------------------------------------------------------------------------------------------------------------------------------------------------------------------------------------------------------------------------------------------------------------------------------------------------------------------------------------------------------------------------------------------------------------------------------------------------------------------------------------------------------------------------------------|
| Key results | 18 | Summarise key results with reference to study objectives | Page 8 (Discussion para 2) | Our modelling of national configurations of HASUs, designed to replicate the population benefits from centralisation of acute stroke services, has shown the feasibility but also the compromises necessary to maximise these benefits. Currently just over half (56%) of patients with acute stroke are admitted to a stroke unit with at least 600 admissions per year[2], and NHS England proposes to increase this proportion through centralisation in fewer, larger units[14]. These HASUs would have staffing levels and competencies as specified in national standards[15,16], and provide intensive (level 2) nursing and medical care for the initial 72 hours after onset (on average) before repatriation of the patient once medically stable to local |
|-------------|----|----------------------------------------------------------|----------------------------|----------------------------------------------------------------------------------------------------------------------------------------------------------------------------------------------------------------------------------------------------------------------------------------------------------------------------------------------------------------------------------------------------------------------------------------------------------------------------------------------------------------------------------------------------------------------------------------------------------------------------------------------------------------------------------------------------------------------------------------------------------------------|

---

step-down services for ongoing acute care and rehabilitation. By reducing from the current 127 acute sites to between 75-85 HASUs, our centralised HASU model predicts it is possible for all stroke patients to attend a unit of sufficient size, but with a reduction in the proportion of patients within 30 minutes travel from the current 90% to 80-82%, and with 95% and 99% of patients within 45 and 60 minutes travel respectively.

|                |                                                                                                                                                                               |                            |                                                                                                                                                                                                                                                                    |
|----------------|-------------------------------------------------------------------------------------------------------------------------------------------------------------------------------|----------------------------|--------------------------------------------------------------------------------------------------------------------------------------------------------------------------------------------------------------------------------------------------------------------|
| Limitations    | 19 Discuss limitations of the study, taking into account sources of potential bias or imprecision. Discuss both direction and magnitude of any potential bias                 | Page 9 (Discussion para 3) | In constructing our model, we have assumed all patients will be taken to their closest HASU. If this is not the case (such as decisions being made instead on organisational boundaries) then some inaccuracy of the model around those boundaries is expected.... |
| Interpretation | 20 Give a cautious overall interpretation of results considering objectives, limitations, multiplicity of analyses, results from similar studies, and other relevant evidence | Page 10 (Conclusion)       | A policy of centralising acute stroke services across England in 75-85 HASUs could realistically achieve 80-85% of patients attending an acute unit of sufficient size within 30 minutes travel time (with 97% and 98%                                             |

1  
2  
3  
4  
5  
6  
7  
8  
9  
10  
11  
12  
13  
14  
15  
16  
17  
18  
19  
20  
21  
22  
23  
24  
25  
26  
27  
28  
29  
30  
31  
32  
33  
34  
35  
36  
37  
38  
39  
40  
41  
42  
43  
44  
45  
46  
47  
48  
49

For peer review only

being within 45 and 60 minutes travel respectively), and with no unit larger than 2,000 stroke admissions per year. Though centralisation could offer significant advantages to the large majority of patients, a small minority (2-4% of the population) would be significantly adversely affected by centralisation, and planning for this minority will inevitably involve compromise between the recommended ideal institutional size and travel times.

---

|                  |    |                                                                       |                                                                            |
|------------------|----|-----------------------------------------------------------------------|----------------------------------------------------------------------------|
| Generalisability | 21 | Discuss the generalisability (external validity) of the study results | Not applicable, as not trying to extrapolate from trial to full population |
|------------------|----|-----------------------------------------------------------------------|----------------------------------------------------------------------------|

---

**Other information**

---

|         |    |                                                                                                                                                               |                            |                                                                                                                                                                                                                                                                                                                                                                  |
|---------|----|---------------------------------------------------------------------------------------------------------------------------------------------------------------|----------------------------|------------------------------------------------------------------------------------------------------------------------------------------------------------------------------------------------------------------------------------------------------------------------------------------------------------------------------------------------------------------|
| Funding | 22 | Give the source of funding and the role of the funders for the present study and, if applicable, for the original study on which the present article is based | Page 12 (Acknowledgements) | This study was funded by the National Institute of Health Research (NIHR) Collaboration for Leadership in Applied Health Research and Care for the South West Peninsula. The views and opinions expressed in this paper are those of the authors, and not necessarily those of the NHS, the National Institute for Health Research, or the Department of Health. |
|---------|----|---------------------------------------------------------------------------------------------------------------------------------------------------------------|----------------------------|------------------------------------------------------------------------------------------------------------------------------------------------------------------------------------------------------------------------------------------------------------------------------------------------------------------------------------------------------------------|

---

1  
2  
3  
4  
5  
6 \*Give information separately for cases and controls in case-control studies and, if applicable, for exposed and unexposed groups in cohort and cross-sectional studies.  
7  
8  
9

10 **Note:** An Explanation and Elaboration article discusses each checklist item and gives methodological background and published examples of transparent reporting. The STROBE  
11 checklist is best used in conjunction with this article (freely available on the Web sites of PLoS Medicine at <http://www.plosmedicine.org/>, Annals of Internal Medicine at  
12 <http://www.annals.org/>, and Epidemiology at <http://www.epidem.com/>). Information on the STROBE Initiative is available at [www.strobe-statement.org](http://www.strobe-statement.org).  
13  
14  
15  
16  
17  
18  
19  
20  
21  
22  
23  
24  
25  
26  
27  
28  
29  
30  
31  
32  
33  
34  
35  
36  
37  
38  
39  
40  
41  
42  
43  
44  
45  
46  
47  
48  
49

# BMJ Open

## Feasibility of a hyper-acute stroke unit model of care across England. A modelling analysis.

|                                 |                                                                                                                                                                                                                                                                                                                                              |
|---------------------------------|----------------------------------------------------------------------------------------------------------------------------------------------------------------------------------------------------------------------------------------------------------------------------------------------------------------------------------------------|
| Journal:                        | <i>BMJ Open</i>                                                                                                                                                                                                                                                                                                                              |
| Manuscript ID                   | bmjopen-2017-018143.R2                                                                                                                                                                                                                                                                                                                       |
| Article Type:                   | Research                                                                                                                                                                                                                                                                                                                                     |
| Date Submitted by the Author:   | 11-Oct-2017                                                                                                                                                                                                                                                                                                                                  |
| Complete List of Authors:       | Allen, Michael; University of Exeter Medical School<br>Pearn, Kerry; University of Exeter, Medical School<br>Villeneuve, Emma; University of Exeter, Medical School<br>Monks, T; University of Southampton Faculty of Health Sciences<br>Stein, Ken; University of Exeter, Medical School<br>James, Martin; Royal Devon and Exeter Hospital, |
| <b>Primary Subject Heading</b>: | Health services research                                                                                                                                                                                                                                                                                                                     |
| Secondary Subject Heading:      | Cardiovascular medicine                                                                                                                                                                                                                                                                                                                      |
| Keywords:                       | Stroke < NEUROLOGY, Organisation of health services < HEALTH SERVICES ADMINISTRATION & MANAGEMENT, Quality in health care < HEALTH SERVICES ADMINISTRATION & MANAGEMENT                                                                                                                                                                      |
|                                 |                                                                                                                                                                                                                                                                                                                                              |

SCHOLARONE™  
Manuscripts

# Feasibility of a hyper-acute stroke unit model of care across England. A modelling analysis.

Michael Allen\*, Kerry Pearn, Emma Villeneuve, Thomas Monks, Ken Stein, Martin James

Michael Allen, Honorary Research Fellow, University of Exeter Medical School, St Luke's Campus, Heavitree Road, EXETER, EX1 2LU, UK

Kerry Pearn, Associate Research Fellow, University of Exeter Medical School, St Luke's Campus, Heavitree Road, EXETER, EX1 2LU, UK

Emma Villeneuve, Associate Research Fellow, University of Exeter Medical School, St Luke's Campus, Heavitree Road, EXETER, EX1 2LU, UK

Thomas Monks, Principal Research Fellow, NIHR CLAHRC Wessex Data Science Hub, Room AA72 South Academic Block, Southampton General Hospital, SOUTHAMPTON, SO16 6YD

Ken Stein, Deputy Director of PenCLAHRC, University of Exeter Medical School, St Luke's Campus, Heavitree Road, EXETER, EX1 2LU, UK

Martin James, Consultant Stroke Physician, Royal Devon & Exeter NHS trust, Barrack Road, EXETER, EX2 5DW, UK

\*Correspondence to: [m.allen@exeter.ac.uk](mailto:m.allen@exeter.ac.uk)

The Corresponding Author has the right to grant on behalf of all authors and does grant on behalf of all authors, a worldwide licence to the Publishers and its licensees in perpetuity, in all forms, formats and media (whether known now or created in the future), to i) publish, reproduce, distribute, display and store the Contribution, ii) translate the Contribution into other languages, create adaptations, reprints, include within collections and create summaries, extracts and/or, abstracts of the Contribution, iii) create any other derivative work(s) based on the Contribution, iv) to exploit all subsidiary rights in the Contribution, v) the inclusion of electronic links from the Contribution to third party material where-ever it may be located; and, vi) licence any third party to do any or all of the above.

All authors have completed the ICMJE uniform disclosure form at [www.icmje.org/coi\\_disclosure.pdf](http://www.icmje.org/coi_disclosure.pdf) and declare: no support from any organisation for the submitted work; no financial relationships with any organisations that might have an interest in the submitted work in the previous three years; no other relationships or activities that could appear to have influenced the submitted work.



## Ethics

This study used aggregate patient counts only, obtained from HES. No individual patient-level data was sought, obtained or used in the study. No ethical approval was sought.

## Authorship & contributorship

Michael Allen is the lead author and guarantor, and proposed the key methodology to be used in the study. He also contributed to coding of the model.

Kerry Pearn wrote much of the code used in the model, and contributed to refining the basis of the modelling. She was involved in reviewing and editing the paper.

Emma Villeneuve developed the initial prototypes of the model employed, testing a number of heuristic approaches. She was involved in reviewing and editing the paper.

Thomas Monks framed the initial problem of balancing access to stroke care with developing a unit of sufficient size to maintain expertise, and recommended the modelling study contained herein<sup>1</sup>. He critiqued the methods used in this study, and was involved in reviewing and editing the paper.

Ken Stein oversaw all work. He was involved in framing the problem to be modelled<sup>1</sup>. He critiqued the methods used in this study, and was involved in reviewing and editing the paper.

Martin James is the clinical stroke consultant for the work and paper. He was involved in framing the problem to be modelled<sup>1</sup>. He advised on the clinical objectives of the study, was involved in authoring, reviewing and editing the paper.

1. Monks T, Pitt M, Stein K, et al. Hyperacute stroke care and NHS England's business plan. *BMJ* 2014;34

## Transparency

The lead author (Michael Allen) confirms that the manuscript is an honest, accurate, and transparent account of the study being reported; that no important aspects of the study have been omitted.

## Funding

This study was funded by the National Institute of Health Research (NIHR) Collaboration for Leadership in Applied Health Research and Care for the South West Peninsula. The views and opinions expressed in this paper are those of the authors, and not necessarily those of the NHS, the National Institute for Health Research, or the Department of Health. Thomas Monks was funded by NIHR CLAHRC Wessex.

## Data sharing

Full data and code used for this study is available at:  
[https://github.com/MichaelAllen1966/stroke\\_unit\\_location](https://github.com/MichaelAllen1966/stroke_unit_location)

Included in the data and code are:

Counts of acute stroke admissions by LSOA

Estimated travel times from all LSOAs to all acute stroke units

Hospital information (name, location)

Full source code used to produce results reported here (which runs using open source software)

## Abstract

**Objectives:** The policy of centralising hyperacute stroke units (HASUs) in England aims to provide stroke care in units that are both large enough to sustain expertise (>600 admissions/year) and dispersed enough to rapidly deliver time-critical treatments (<30 minutes maximum travel time). Currently, just over half (56%) of stroke patients access care in such a unit. We sought to model national configurations of HASUs that would optimise both institutional size and geographical access to stroke care, to maximise the population benefit from the centralisation of stroke care.

**Design:** Modelling of the effect of the national reconfiguration of stroke services. Optimal solutions were identified using a heuristic genetic algorithm.

**Setting:** 127 acute stroke services in England, serving a population of 54 million people.

**Participants:** 238,887 emergency admissions with acute stroke over a 3-year period (2013-2015).

**Intervention:** Modelled reconfigurations of HASUs optimised for institutional size and geographical access.

**Main Outcome Measure:** Travel distances and times to HASUs, proportion of patients attending a HASU with at least 600 admissions per year, minimum and maximum HASU admissions.

**Results:** Solutions were identified with 75-85 HASUs with annual stroke admissions in the range 600-2,000, which achieve up to 82% of patients attending a stroke unit within 30 minutes estimated travel time (with at least 95% and 98% patients being within 45 and 60 minutes travel time respectively).

**Conclusions:** The reconfiguration of hyperacute stroke services in England could lead to all patients being treated in a HASU with between 600 and 2,000 admissions per year. However, the proportion of patients within 30 minutes of a HASU would fall from over 90% to 80-82%.

## Article summary

### Strengths and weaknesses

- The study described allows for a national view of the relationship between the number of acute stroke units (based on choosing from current locations of acute stroke units) in England and the dual goals of (1) having all patients attend a stroke unit with at least 600 acute confirmed stroke admissions per year, and (2) having patients within 30 minutes of an acute stroke unit.
- The study uses a genetic algorithm that is able to hunt for solutions when there are a vast range of possibilities.
- The study takes an objective approach with explicitly described objectives.
- A limitation of the study is that identified solutions do not take into account the complex local pressures and reasons for preferring one unit over another at the cost of the objectives used in identifying solutions in this study.

### Introduction

Stroke is a leading cause of death and disability worldwide, with an estimated 5.9 million deaths and 33 million stroke survivors in 2010[1]. In England, Wales and Northern Ireland 85,000 people are hospitalised with stroke each year[2], and stroke is ranked third as a cause of loss of disability-adjusted life years in the UK over the last 25 years[3].

In recent years the NHS in England has sought to promote the reconfiguration of stroke services across the country, building on the evidence-based model developed in London[4]. Centralisation of stroke care in London has been shown to increase thrombolysis rates, reduce mortality, reduce length of stay, and reduce long-term costs to the NHS[5,6]. These benefits are considered to be due to patients being cared for by specialist stroke teams, facilitated by direct hospital admission to a large hyperacute stroke unit (HASU). In the HASU model of care patients are taken directly to units which may provide immediate response to stroke, including assessment, stabilisation and any primary intervention, before later discharge or transfer to step-down local stroke units[7]. Guidelines recommend a minimum number of admissions to a HASU of 600 patients per year, and NHS England reconfiguration guidelines also suggest 'travel time should be ideally 30 minutes but no more than 60 minutes'[8,9]. Centralisation of acute stroke care in London was guided by a modelling exercise whereby sites were identified with no Londoner more than a 30 minute ambulance journey from the nearest HASU[5]. Time from onset to emergency hospital treatment is known to be especially critical for ischaemic stroke, when the effectiveness of thrombolysis declines rapidly in the first few hours after stroke[10]. More recently, mechanical thrombectomy has shown effectiveness in patients presenting up to 6 hours after stroke onset, with effectiveness still higher if treatment is given earlier[11].

With the critical importance of speed to treatment with thrombolysis or thrombectomy, it has nonetheless been questioned if the improvements in outcome that came with centralisation of stroke services in metropolitan areas could be replicated in more rural environments, with modelling being suggested as a first step at analysing the problem[12]. We therefore sought to investigate the potential for meeting the dual objectives of all patients with acute stroke being admitted to a HASU of sufficient size (at least 600 acute stroke patients per year) and that unit being within 30 minutes travel time. The modelling described here focusses on the Hyper Acute Stroke Unit phase of stroke care[7] and does not extend to organisation of ongoing step-down care in local stroke units, or after discharge home.

## Methods

Detailed methods, with links to underlying data and source code used, are given in the on-line appendix.

The model predicts, for any configuration of HASUs, the travel times (fastest road travel time chosen, from home location of patient to hospital with the shortest estimated travel time), and the number of admissions to each HASU. A genetic algorithm was used to identify good configurations.

We included 238,887 patients coded with ischaemic or haemorrhagic stroke (ICD-10 I61, I63, I64) with an emergency admission over a three-year period (2013-2015). Stroke admission numbers were counts of admissions for each of 31,771 Lower Super Output Areas (LSOAs) in England. No individual patient level data was accessed: counts of admissions per LSOA were extracted from Hospital Episode Statistics (HES; <http://www.hscic.gov.uk/hes>) with access to national HES data managed through Lightfoot Solutions (<http://www.lightfootsolutions.com/>). Estimated fastest road travel times were obtained from a geographic information system (Maptitude, with MP-MileCharter add-in).

We used a genetic algorithm based on NSGA-II[13] to derive potential configurations of HASUs across England, balancing competing objectives. Solutions were eliminated if another solution was equally as good in all optimisation parameters and was better in at least one parameter. The selected configurations were based on a range of optimisation parameters (listed in the online appendix) which seek to minimise travel distances and to control admission numbers (admitting as many people to HASUs with at least 600 admissions per year while also seeking to control the maximum number of admissions to any hospital). Solutions retained are referred to as non-dominated solutions; together these form a 'Pareto front' where improved performance in one objective can only be at the expense of another.

## Results

The model assumes patients attend the hospital closest to their home location. In order to test this assumption we compared admissions predicted assuming that the closest hospital was used with actual admissions to each hospital. When comparing predicted with actual admissions there was a median absolute error of 105 admissions per unit per year, or a relative absolute error of 17%. Prediction accuracy depended on proximity to a hospital's nearest neighbour, and was proportionately greater in urban areas where travel distance is less of a consideration. HASUs located close to other acutely admitting units have a poorer prediction accuracy than those located further from the nearest alternative acute stroke unit (figure 1). These results gave confidence in progressing with the basic model assumption that patients should generally attend their closest unit.

With an increasing number of HASUs, average and maximum road travel times reduce (figure 2), following the law of 'diminishing returns'. For example, with 24 units (the number of neuroscience centres in England) the lowest average travel time is 34 minutes. As the number of HASUs is increased to 50, 75 and 100, the best average travel times found are 26, 22 and 19 minutes respectively. The best maximum travel time found are 109, 99, 78 and 78 minutes with 25, 50, 75 and 100 HASUs. Average and maximum travel times for the identified solutions depend on what other factors are prioritised in the model. For example, with 25 HASUs, average travel distances in different configurations (all of which are non-dominated solutions) range from 34 to 62 minutes, and maximum travel time range from 109 to 378 minutes.

1  
2  
3 As the number of HASUs increases, both the maximum and minimum number of admissions to any  
4 single hospital in the configuration reduces (figure 3). For example, with 25 units the lowest possible  
5 maximum number of admissions to any single unit is 4,381 admissions per year. With 50, 75 and 100  
6 units the largest hospital has admissions of 2,493, 1,829 and 1,687 patients per year. These results  
7 represent the best compromise between unit size and distance if no other factors are regarded as  
8 important. To achieve all admissions attending a HASU with at least 600 admissions per year the  
9 maximum number of hospitals is 85, by which point 82% of the population is within 30 minutes  
10 travel (with 95% and 98% being within 45 and 60 minutes, and the maximum travel time is 99  
11 minutes).

12  
13  
14 As the number of HASUs increases, the proportion of patients within 30 minutes travel increases  
15 (figure 4), to a maximum of 90% (the best possible proportions with 25, 50, 75 and 100 units were  
16 52%, 70%, 84% and 88%). At the same time, increasing the number of HASUs reduces the number of  
17 patients attending a unit with at least 600 admissions per year (figure 4). Increasing the number of  
18 units lead first to an increase in the proportion of patients attending a unit of sufficient size within 30  
19 minutes travel, but when increased further a reduction in this proportion is seen (figure 4). The  
20 maximum proportion of patients attending a unit admitting 600 patients per year within 30 minutes  
21 travel is 82%. Solutions with at least 80% of patients being within 30 minutes of a HASU admitting at  
22 least 600 patients per year have between 75 and 95 HASUs. If target travel time is increased from 30  
23 to 45 minutes then the maximum proportion of patients attending a HASU of sufficient size is 95%,  
24 with this maximum occurring with between 65 and 90 units.

25  
26  
27 In each configuration it may be important to control the maximum number of admissions to any  
28 single unit. Configurations of between 75 and 85 HASUs were identified with all patients attending a  
29 unit admitting 600 patients per year, at least 80% of patients within 30 minutes travel and maximum  
30 admissions to any single HASU of no greater than 2,000. The algorithm identified 93 configurations in  
31 which annual admissions were kept within 600-2,000, at least 80% of patients were within 30  
32 minutes of their closest HASU, and at least 95% and 98% of patients were with 45 and 60 minutes of  
33 their closest unit. The distribution of size of unit, among all solutions with yearly admissions per unit  
34 within the 600 to 2,000 range was skewed significantly towards lower admissions (figure 5), with only  
35 10% of units having more than 1,500 admissions per year.

## 36 37 38 39 Discussion

40 Our modelling of national configurations of HASUs, designed to replicate the population benefits  
41 from centralisation of acute stroke services, has shown the feasibility but also the compromises  
42 necessary to maximise these benefits. Currently just over half (56%) of patients with acute stroke are  
43 admitted to a stroke unit with at least 600 admissions per year[2], and NHS England proposes to  
44 increase this proportion through centralisation in fewer, larger units[14]. These HASUs would have  
45 staffing levels and competencies as specified in national standards[15,16], and provide intensive  
46 (level 2) nursing and medical care for the initial 72 hours after onset (on average) before repatriation  
47 of the patient once medically stable to local step-down services for ongoing acute care and  
48 rehabilitation. By reducing from the current 127 acute sites to between 75-85 HASUs, our centralised  
49 HASU model predicts it is possible for all stroke patients to attend a unit of sufficient size, but with a  
50 reduction in the proportion of patients within 30 minutes travel from the current 90% to 80-82%,  
51 and with 95% and 98% of patients within 45 and 60 minutes travel respectively.

52  
53  
54  
55 Maximising the number of patients attending a HASU with at least 600 stroke admissions per year is  
56 not an end in itself. The figure is an approximation for the size of a HASU able to develop and sustain  
57 expertise in stroke care[9], and overcome identified barriers to improved care such as  
58  
59  
60

1  
2  
3 thrombolysis[17–19]. An association has been observed between door-to-needle time for  
4 thrombolysis and institutional size[20,21]. Patients admitted to HASUs in areas that have undergone  
5 centralisation were found to be more likely to receive other important clinical interventions such as  
6 brain scanning and direct admission to a stroke unit sooner[22]. However, the corollary of such  
7 centralisations is the creation of very large units: the most recent Greater Manchester  
8 reconfiguration has created one HASU with over 2,000 stroke admissions/year. Our modelling has  
9 explored the compromises between institutional size and distance, and the differential effects from  
10 centralisation in urban and rural areas. In seeking to balance these often competing priorities, we  
11 sought solutions where the largest unit had fewer than 2,000 confirmed stroke admissions per year.  
12 We observed that in centralised solutions with all hospital admissions between 600 and 2,000  
13 admissions per year, fewer than 10% of hospitals would have admissions of more than 1,500 per  
14 year. Nevertheless, large-scale reconfigurations raise significant issues around the capacity of a small  
15 number of very large receiving HASUs, both in infrastructure and workforce, and the potential  
16 disbenefits of such large units (if any) are much less well understood. Centralisation to 75-85  
17 hospitals in the manner we have described could therefore be expected to provide a significant  
18 benefit to the majority of patients. To yield these benefits, the large majority of patients will travel  
19 only moderately further (if at all) to reach a HASU. The disbenefits are to approximately 1.5% of the  
20 population who would be more than 60 minutes away from a reconfigured HASU (compared with an  
21 estimated 0.3% with all current acute stroke units), and to the 2% of patients who are currently  
22 within 30 minutes of an existing centre but who, with centralisation, will travel more than 45 minutes  
23 to their nearest HASU. Consideration is therefore needed of how the disbenefits for these patients  
24 might be mitigated. Increased travel times might be offset by targeted stroke awareness campaigns  
25 (which have been shown to enhance patient response to suspected stroke[23]) leading to earlier  
26 contact of emergency services. Increased travel time may also be offset by reduced door-to-  
27 treatment time in the HASU[20,24]. More radical solutions for isolated areas include mobile  
28 diagnosis and treatment[25]. Early diagnostic access and intravenous thrombolysis is a particular  
29 issue given the paucity of geographical coverage of mechanical thrombectomy in the UK, which  
30 promotes a model of 'drip-and-ship' (near-patient thrombolysis followed by immediate transfer to a  
31 more distant thrombectomy centre); currently only 75% of the English population is within 45  
32 minutes travel time of one of the current 24 neurosciences centres, where the expertise in this  
33 procedure is exclusively concentrated. All of these impacts from reconfiguration are not uniformly  
34 distributed, but fall disproportionately on more rural populations, and the existing evidence base  
35 from predominantly metropolitan reconfigurations[5,7] does not allow a precise estimate of the  
36 trade-offs at hand when balancing locality against institutional size – a limitation that will hamper  
37 professional and public debate regarding the benefits and consequences of large service  
38 reorganisations.

39  
40  
41  
42  
43  
44  
45  
46 In constructing our model, we have assumed all patients will be taken to their closest HASU. If this is  
47 not the case (such as decisions being made instead on organisational boundaries) then some  
48 inaccuracy of the model around those boundaries is expected. This will be especially true in areas  
49 that have more than one HASU in close proximity; in such cases choice of destination may be  
50 influenced by factors (such as institutional reputation) other than shortest travel time. With  
51 increasing centralisation inaccuracies due to the proximity of units will reduce, as fewer patients will  
52 be on the boundary where travel time is not the only influence on the destination. We have also  
53 sought to avoid infeasibly large units (those larger than the any existing HASU with more than 2,000  
54 stroke admissions/year), particularly as such an arrangement involves large numbers of stroke-like  
55 presentations ('stroke mimics') also being conveyed to a HASU – such mimics represent as much as  
56 an additional 32% of admissions[26]. Centralisation therefore raises significant issues around the  
57  
58  
59  
60

1  
2  
3 capacity of receiving HASUs, both in infrastructure and workforce. Continued capacity at any HASU  
4 will depend on the efficient repatriation to locally-based post-acute and rehabilitation services (e.g.  
5 after the first 48-72 hours of care), and we have not modelled these effects or their vulnerability in  
6 this paper. There is also uncertainty around the recommended target of 600 admissions per year, not  
7 least as random variation would be expected to vary this figure between 550-650 (based on a  
8 Poisson distribution). With an ageing population, however, we anticipate a steady increase in  
9 admissions to hospital with disabling stroke despite better preventative care, particularly in stroke  
10 related to atrial fibrillation[27]. Although such forecasting is imprecise, a potential increase in stroke  
11 incidence and hospital admissions could be driven by a predicted 54% increase in the population of  
12 England aged 75 or over the next 15 years[28]. Such a rise would militate against enforcing the lower  
13 threshold for admissions too strictly (a centre admitting 500 strokes/year at present would very  
14 possibly be above that threshold in years to come), and may incline planners to err towards a lower  
15 maximum size for any one HASU of say, 1,500 stroke admissions/year, to allow for the projected  
16 growth in stroke incidence.  
17  
18  
19

20 Care should always be taken when considering what appear to be mathematically 'optimal' solutions.  
21 A model of this size identifies many solutions that have very similar performance, with only marginal  
22 differences between them. Our results are therefore best interpreted as showing the broad number  
23 of HASUs that are needed on a national or regional scale to deliver the maximum benefit from  
24 centralisation, and what impact this is likely to have on a significant minority of patients. Multiple  
25 objective optimisation location problems rarely, if ever, have a single explicit solution, and can  
26 illuminate but not dictate regional planning which is still best conducted on a smaller scale,  
27 incorporating other local knowledge. Nonetheless, national-level analysis can provide an insight into  
28 the range of optimal distributions of stroke centres across England, for which geographical factors  
29 are of greater importance than in the predominantly urban reconfigurations that have taken place  
30 thus far. For the population of over 8 million people in London, reconfiguration resulted in 8 HASUs  
31 with a range of annual stroke admissions between 775 and 1,288 (or 1,023 – 1,700 when FAST-  
32 positive stroke mimics are included), and an average ambulance travel time of 17 minutes[2,7]; in  
33 Greater Manchester, reconfiguration resulted in 3 HASUs (total stroke admissions between 1,073 and  
34 2,015/year) serving a population of approximately 2.8 million. The national algorithm has identified  
35 many possible configurations in which annual admissions to any HASU are within the range 600-  
36 2,000 and with at least 80% of patients within 30 minutes of their closest HASU. Choosing between  
37 approximately similar options will require other considerations to be taken into account, and this is  
38 best performed at a regional level – although not at the relatively small 'footprint' of many of NHS  
39 England's 44 Sustainability and Transformation Plans (STPs), the current geographical unit of  
40 planning.  
41  
42  
43  
44

45 Acute stroke care is evolving, and the development of mechanical thrombectomy for acute large  
46 artery stroke is likely to create an imperative for still greater centralisation of services[11]. The  
47 geographical issues we have identified here will act as an even greater influence on service planning  
48 for such specialised treatment, with a similar or more pronounced differential effect between urban  
49 and rural environments – removing, for example, the rationale for any metropolitan HASU that is not  
50 also capable of delivering mechanical thrombectomy. Further modelling work should be focussed on  
51 how best to organise care across England when still greater centralisation of some services are  
52 required for a significant proportion of patients.  
53  
54  
55  
56  
57  
58  
59  
60

## Conclusions

A policy of centralising acute stroke services across England in 75-85 HASUs could realistically achieve 80-85% of patients attending an acute unit of sufficient size within 30 minutes travel time (with 95% and 98% being within 45 and 60 minutes travel respectively), and with no unit larger than 2,000 stroke admissions per year. Though centralisation could offer significant advantages to the large majority of patients, a small minority (2-4% of the population) would be significantly adversely affected by centralisation, and planning for this minority will inevitably involve compromise between the recommended ideal institutional size and travel times. With centralisation of hyper-acute care, thought also needs to be given to optimal organisation of follow-on care at home or in step-down units, which is beyond the scope of this paper.

For peer review only



## What is known already, and what this study adds

### What is known already?

NHS England's policy for the centralisation of acute stroke care is based on observational evidence of the mortality benefits from such centralised services, and recommends that all patients should attend a hyperacute stroke unit that both admits at least 600 acute stroke patients per year and is within 30 minutes travel time. Currently just over half (55%) of patients in England receive care at a HASU fulfilling both these conditions.

### What this study adds

Applying a multi-objective genetic algorithm approach, we predict that centralising acute stroke services across England in 75-85 HASUs (from the present 127 stroke centres) could realistically achieve all patients attending a stroke unit which has at least 600 acute stroke admissions per year, with 82%, 97% and 99% patients being within 30, 45 and 60 minutes travel respectively. The disbenefit to a significant rural minority is that approximately 7% of patients will move out of a 30 minute travel distance, and an additional 0.7% of patients move out of a 60 minute travel distance.

## Acknowledgements

This study was funded by the National Institute of Health Research (NIHR) Collaboration for Leadership in Applied Health Research and Care for the South West Peninsula. The views and opinions expressed in this paper are those of the authors, and not necessarily those of the NHS, the National Institute for Health Research, or the Department of Health.

## References

- 1 Feigin VL, Forouzanfar MH, Krishnamurthi R, *et al.* Global and regional burden of stroke during 1990-2010: Findings from the Global Burden of Disease Study 2010. *Lancet* 2014;**383**:245–55. doi:10.1016/S0140-6736(13)61953-4
- 2 Sentinel Stroke Audit Programme (SSNAP). Apr2015Mar2016-AnnualResultsPortfolio. Natl. Results April 2015-Mar 2016 <https://www.strokeaudit.org/Documents/Results/National/Apr2015Mar2016/Apr2015Mar2016-AnnualResultsPortfolio.aspx>. 2016.
- 3 Newton JN, Briggs ADM, Murray CJL, *et al.* Changes in health in England, with analysis by English regions and areas of deprivation, 1990-2013: A systematic analysis for the Global Burden of Disease Study 2013. *Lancet* 2015;**386**:2257–74. doi:10.1016/S0140-6736(15)00195-6
- 4 NHS England. Putting Patients First: The NHS business plan 2013/4 - 2015/6. <https://www.england.nhs.uk/wp-content/uploads/2014/04/ppf-1415-1617-wa.pdf> Published Online First: 2013. <https://www.england.nhs.uk/wp-content/uploads/2013/04/ppf-1314-1516.pdf>
- 5 Morris S, Hunter RM, Ramsay AIG, *et al.* Impact of centralising acute stroke services in English metropolitan areas on mortality and length of hospital stay: difference-in-differences analysis. *Bmj* 2014;**349**:g4757–g4757. doi:10.1136/bmj.g4757
- 6 Hunter RM, Davie C, Rudd A, *et al.* Impact on Clinical and Cost Outcomes of a Centralized Approach to Acute Stroke Care in London: A Comparative Effectiveness Before and After Model. *PLoS One* 2013;**8**:1–9. doi:10.1371/journal.pone.0070420
- 7 Fulop N, Boaden R, Hunter R, *et al.* Innovations in major system reconfiguration in England: a study of the effectiveness, acceptability and processes of implementation of two models of stroke care. *Implement Sci* 2013;**8**:5. doi:10.1186/1748-5908-8-5
- 8 Price C, James M. Meeting the Future Challenge of Stroke Meeting the Future Challenge of Stroke. Br. Assoc. Stroke Physicians. 2011. [www.basp.ac.uk](http://www.basp.ac.uk)
- 9 NHS England. Stroke Services: Configuration Decision Support Guide ([www.eoescn.nhs.uk/index.php/download\\_file/force/2069/168/](http://www.eoescn.nhs.uk/index.php/download_file/force/2069/168/)). 2015.
- 10 Emberson J, Lees KR, Lyden P, *et al.* Effect of treatment delay, age, and stroke severity on the effects of intravenous thrombolysis with alteplase for acute ischaemic stroke: A meta-analysis of individual patient data from randomised trials. *Lancet* 2014;**384**:1929–35. doi:10.1016/S0140-6736(14)60584-5
- 11 Goyal M, Menon BK, Van Zwam WH, *et al.* Endovascular thrombectomy after large-vessel ischaemic stroke: A meta-analysis of individual patient data from five randomised trials. *Lancet* 2016;**387**:1723–31. doi:10.1016/S0140-6736(16)00163-X

- 1  
2  
3 12 Monks T, Pitt M, Stein K, *et al.* Hyperacute stroke care and NHS England's business  
4 plan. *BMJ* 2014;**348**:g3049. doi:10.1136/bmj.g3049  
5  
6 13 Deb K, Pratap A, Agarwal S, *et al.* A fast and elitist multiobjective genetic algorithm:  
7 NSGA-II. *IEEE Trans Evol Comput* 2002;**6**:182–97. doi:10.1109/4235.996017  
8  
9 14 NHS England. Our Business Plan 2016/17. 2016.[https://www.england.nhs.uk/wp-](https://www.england.nhs.uk/wp-content/uploads/2016/03/bus-plan-16.pdf)  
10 [content/uploads/2016/03/bus-plan-16.pdf](https://www.england.nhs.uk/wp-content/uploads/2016/03/bus-plan-16.pdf)  
11  
12 15 Intercollegiate Stroke Working Party. National Clinical Guideline for Stroke, 5th  
13 Edition (Royal College of Physicians of London).  
14 2016.[www.strokeaudit.org.uk/guideline](http://www.strokeaudit.org.uk/guideline) (accessed 2 Aug 2017).  
15  
16 16 NHS England. Seven Day Services Clinical Standards.  
17 2017.[https://www.england.nhs.uk/wp-content/uploads/2017/02/clinical-standards-](https://www.england.nhs.uk/wp-content/uploads/2017/02/clinical-standards-feb17.pdf)  
18 [feb17.pdf](https://www.england.nhs.uk/wp-content/uploads/2017/02/clinical-standards-feb17.pdf)  
19  
20 17 Eissa A, Krass I, Bajorek B V. Barriers to the utilization of thrombolysis for acute  
21 ischaemic stroke. *J Clin Pharm Ther* 2012;**37**:399–409.  
22 doi:<http://dx.doi.org/10.1111/j.1365-2710.2011.01329.x>  
23  
24 18 Carter-Jones CR. Stroke thrombolysis: Barriers to implementation. *Int. Emerg. Nurs.*  
25 2011;**19**:53–7. doi:10.1016/j.ienj.2010.02.005  
26  
27 19 Monks T, Pitt M, Stein K, *et al.* Maximizing the population benefit from thrombolysis  
28 in acute ischemic stroke: A modeling study of in-hospital delays. *Stroke*  
29 2012;**43**:2706–11. doi:10.1161/STROKEAHA.112.663187  
30  
31 20 Bray BD, Campbell J, Cloud GC, *et al.* Bigger, faster?: Associations between hospital  
32 thrombolysis volume and speed of thrombolysis administration in acute ischemic  
33 stroke. *Stroke* 2013;**44**:3129–35. doi:10.1161/STROKEAHA.113.001981  
34  
35 21 Strbian D, Ahmed N, Wahlgren N, *et al.* Trends in Door-to-Thrombolysis Time in the  
36 Safe Implementation of Stroke Thrombolysis Registry. *Stroke* 2015;**46**:1275–80.  
37 doi:10.1161/STROKEAHA.114.007170  
38  
39 22 Ramsay AIG, Morris S, Hoffman A, *et al.* Effects of centralizing acute stroke services  
40 on stroke care provision in two large metropolitan areas in England. *Stroke*  
41 2015;**46**:2244–51. doi:10.1161/STROKEAHA.115.009723  
42  
43 23 Mellon L, Doyle F, Rohde D, *et al.* Stroke warning campaigns: delivering better  
44 patient outcomes? A systematic review. *Patient Relat Outcome Meas* 2015;**6**:61.  
45 doi:10.2147/PROM.S54087  
46  
47 24 Meretoja A, Strbian D, Mustanoja S, *et al.* Reducing in-hospital delay to 20 minutes in  
48 stroke thrombolysis. *Neurology* 2012;**79**:306–13.  
49 doi:10.1212/WNL.0b013e31825d6011  
50  
51  
52  
53  
54  
55  
56  
57  
58  
59  
60

- 1  
2  
3 25 Kunz A, Ebinger M, Geisler F, *et al.* Functional outcomes of pre-hospital thrombolysis  
4 in a mobile stroke treatment unit compared with conventional care: an observational  
5 registry study. *Lancet Neurol* 2016;**15**:1035–43. doi:10.1016/S1474-4422(16)30129-6  
6  
7  
8 26 Dawson A, Cloud GC, Pereira AC, *et al.* Stroke mimic diagnoses presenting to a  
9 hyperacute stroke unit. *Clin Med* 2016;**16**:423–6. doi:10.7861/clinmedicine.16-5-423  
10  
11 27 Yiin GSC, Howard DPJ, Paul NLM, *et al.* Recent time trends in incidence, outcome  
12 and premorbid treatment of atrial fibrillation-related stroke and other embolic vascular  
13 events: a population-based study. *J Neurol Neurosurg Psychiatry* 2017;**88**:12–8.  
14 doi:10.1136/jnnp-2015-311947  
15  
16 28 Office of National Statistics. Office of National Statistics (2014). 2014-based  
17 subnational population projections.  
18 2014.[https://www.ons.gov.uk/peoplepopulationandcommunity/populationandmigration](https://www.ons.gov.uk/peoplepopulationandcommunity/populationandmigration/populationprojections/datasets/regionsinenglandtable1)  
19 [/populationprojections/datasets/regionsinenglandtable1](https://www.ons.gov.uk/peoplepopulationandcommunity/populationandmigration/populationprojections/datasets/regionsinenglandtable1)  
20  
21  
22  
23  
24  
25  
26  
27  
28  
29  
30  
31  
32  
33  
34  
35  
36  
37  
38  
39  
40  
41  
42  
43  
44  
45  
46  
47  
48  
49  
50  
51  
52  
53  
54  
55  
56  
57  
58  
59  
60

## Figure legends

Figure 1. Error in predicting admissions (as recorded in SSNAP) grouped by proximity to the closest neighbouring acute stroke unit (10 minute bins). Points show median with error bars indicating inter-quartile range. The left panel shows the absolute error in predicting admission numbers per year, the right panel shows the absolute error as a percentage of actual admissions for each unit.

Figure 2. The effect of changing the number of acute stroke units on average and maximum travel times. The left panel shows the best average and maximum travel times achieved by the algorithm. The middle panel shows average travel times. The bold line represents the best result identified in any scenario. The dotted line shows the worst result identified for a non-dominated solution. The shaded area represents the effective region of trade-off between average travel time and other optimisation parameters. The right panel repeats these results for maximum travel time.

Figure 3. The effect of changing the number of acute stroke units on minimum and maximum admissions to any single unit. The left panel shows the best admissions identified by the algorithm (it is better to have a higher minimum number of admissions and lower maximum admissions; that is the smallest hospital should be as large as possible, and the largest hospital as small as possible). The middle panel shows minimum admission numbers (to the smallest unit in each scenario). The bold line represents the best result identified in any scenario. The dotted line shows the worst result identified for a non-dominated solution. The shaded area represents the effective region of trade-off between average minimum admissions and other optimisation parameters. The right panel repeats these results for maximum admissions in a scenario.

Figure 4. The effect of changing the number of acute stroke units on the proportion of patients attending a unit with 600 admissions per year, the proportion of patients attending a unit within 30 minutes of home location and the proportion of patients attending a unit with 600 admissions per year and within 30 minutes of home location. The top left panel shows the best solutions for each identified by the algorithms. The top right panels show the proportion of patients attending a unit with 600 admissions per year. The bold line represents the best result identified in any scenario. The dotted line shows the worst result identified for a non-dominated solution. The shaded area represents the effective region of trade-off between attending a unit with target admission numbers and other optimisation parameters. The bottom two panels repeat the analysis for the proportion of patients attending a unit within 30 minutes of home location and the proportion of patients attending a unit with 600 admissions per year and within 30 minutes of home location.

Figure 5. Histogram of yearly admissions to hospitals. The histogram shows the distribution of admissions across 93 configurations in which annual admissions were kept within 600-2,000 for all units.

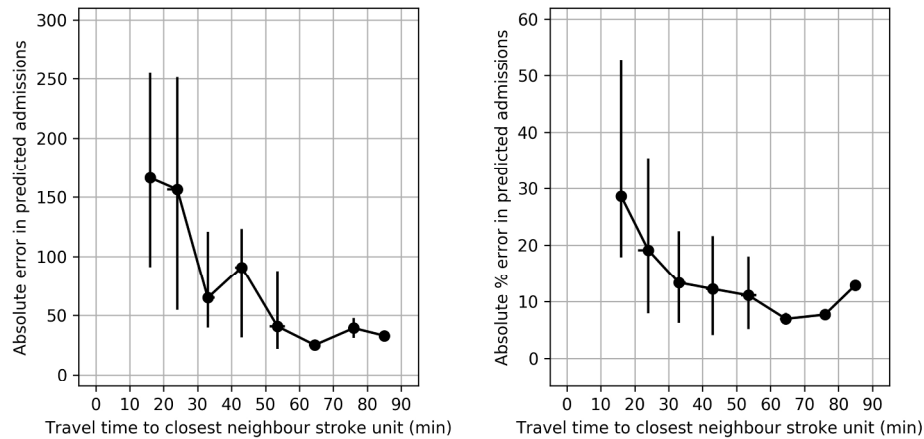

Figure 1. Error in predicting admissions (as recorded in SSNAP) grouped by proximity to the closest neighbouring acute stroke unit (10 minute bins). Points show median with error bars indicating inter-quartile range. The left panel shows the absolute error in predicting admission numbers per year, the right panel shows the absolute error as a percentage of actual admissions for each unit.

215x114mm (300 x 300 DPI)



Figure 2. The effect of changing the number of acute stroke units on average and maximum travel times. The left panel shows the best average and maximum travel times achieved by the algorithm. The middle panel shows average travel times. The bold line represents the best result identified in any scenario. The dotted line shows the worst result identified for a non-dominated solution. The shaded area represents the effective region of trade-off between average travel time and other optimisation parameters. The right panel repeats these results for maximum travel time.

317x139mm (300 x 300 DPI)

Review only



Figure 3. The effect of changing the number of acute stroke units on minimum and maximum admissions to any single unit. The left panel shows the best admissions identified by the algorithm (it is better to have a higher minimum number of admissions and lower maximum admissions; that is the smallest hospital should be as large as possible, and the largest hospital as small as possible). The middle panel shows minimum admission numbers (to the smallest unit in each scenario). The bold line represents the best result identified in any scenario. The dotted line shows the worst result identified for a non-dominated solution. The shaded area represents the effective region of trade-off between average minimum admissions and other optimisation parameters. The right panel repeats these results for maximum admissions in a scenario.

317x139mm (300 x 300 DPI)





Figure 4. The effect of changing the number of acute stroke units on the proportion of patients attending a unit with 600 admissions per year, the proportion of patients attending a unit within 30 minutes of home location and the proportion of patients attending a unit with 600 admissions per year and within 30 minutes of home location. The top left panel shows the best solutions for each identified by the algorithms. The top right panels show the proportion of patients attending a unit with 600 admissions per year. The bold line represents the best result identified in any scenario. The dotted line shows the worst result identified for a non-dominated solution. The shaded area represents the effective region of trade-off between attending a unit with target admission numbers and other optimisation parameters. The bottom two panels repeat the analysis for the proportion of patients attending a unit within 30 minutes of home location and the proportion of patients attending a unit with 600 admissions per year and within 30 minutes of home location.

254x304mm (300 x 300 DPI)

1  
2  
3  
4  
5  
6  
7  
8  
9  
10  
11  
12  
13  
14  
15  
16  
17  
18  
19  
20  
21  
22  
23  
24  
25  
26  
27  
28  
29  
30  
31  
32  
33  
34  
35  
36  
37  
38  
39  
40  
41  
42  
43  
44  
45  
46  
47  
48  
49  
50  
51  
52  
53  
54  
55  
56  
57  
58  
59  
60

For peer review only



Figure 5. Histogram of yearly admissions to hospitals. The histogram shows the distribution of admissions across 93 configurations in which annual admissions were kept within 600-2,000 for all units.

135x98mm (300 x 300 DPI)

ew only

1  
2  
3  
4  
5  
6  
7  
8  
9  
10  
11  
12  
13  
14  
15  
16  
17  
18  
19  
20  
21  
22  
23  
24  
25  
26  
27  
28  
29  
30  
31  
32  
33  
34  
35  
36  
37  
38  
39  
40  
41  
42  
43  
44  
45  
46  
47  
48  
49  
50  
51  
52  
53  
54  
55  
56  
57  
58  
59  
60

# Appendix

## 1 Description of problem

In order to establish a hyper-acute stroke unit (HASU) model for emergency stroke care across England, all HASUs should have a minimum of 600 yearly admissions of confirmed strokes. No unit should be infeasibly large (and we have taken the current largest unit with ~2,000 stroke admissions per year as our upper target). All patients are expected to be taken to their closest HASU, with 'closest' chosen by estimated road travel times.

The problem involves looking for solutions that can place any number of hospitals in any of 127 locations. There are therefore  $2^{127}$  or  $10^{38}$  possible solutions. Each solution requires looking up road travel times from each of 31,171 patient locations to all open hospitals to allocate patients to their closest hospital. There are 13 possible objectives to achieve or trade-off (see section 3.1).

This type of problem is termed 'NP-hard' - it cannot be solved explicitly in reasonable time. And as there are multiple-objectives that trade-off against each other there is no single solution to the problem (as there is no way to objectively determine the weighting of different objectives); rather we are looking for a population of solutions which demonstrate the trade-off between different objectives.

With NP-hard problems there are often a range of different heuristic algorithms which search for good solutions to the problem, while never guaranteeing an optimal solution is found. One set of general purpose heuristic methods are a family of algorithms known as 'genetic algorithms', due to their inspiration coming from the theory of evolution. Here we describe the specific genetic algorithm used in our study.

## 2 Code and data repository

Data and code used for the model are available at:  
[https://github.com/MichaelAllen1966/stroke\\_unit\\_location](https://github.com/MichaelAllen1966/stroke_unit_location)

Note: The code contains a bespoke Genetic Algorithm written in Python/NumPy. No Genetic Algorithm libraries were used.

## 3 Multi-objective problem

### 3.1 Pareto dominance

When solving an optimisation problem based on one objective, the optimal solution is given by the configuration with the best (highest or lowest) objective value. In the case of multi-objective optimisation, comparing several solutions requires reference to the notion of dominance: a vector  $a$  of the objective space dominates another vector  $b$  if all criteria of  $a$  are better or equal to criteria of  $b$  and  $a \neq b$ [1]. Then, a solution is non-dominated if there are no other solutions at least equal in all objectives and better in at least one objective. At the end of the optimisation process, there is no

single best solution but a set of non-dominated solutions, called the Pareto Front. An example of a Pareto Front using two objectives is shown in figure 1.



Figure 1: Example of identification of Pareto front (non-dominated) points when comparing two objectives.

The greater the number of objectives on the Pareto Front the lower the chance that a point will be dominated by another. If there is no correlation between objectives and solutions are entirely random then the chance of a single point being dominated by another single point picked at random is  $0.5^{n_{obj}}$ .

### 3.2 Algorithm objectives

The objectives which could be used to select solutions were:

- 1: Number of hospitals (lower is better)
- 2: Average travel time (lower is better)
- 3: Maximum travel time (lower is better)
- 4: Maximum admissions to any one hospital (lower is better)
- 5: Minimum admissions to any one hospital (higher is better)
- 6: Max/Min admissions ratio (lower is better)
- 7: Proportion patients within estimated 30 min travel distance (higher is better)
- 8: Proportion patients within estimated 45 min travel distance time (higher is better)

1  
2 9: Proportion patients within estimated 60 min travel distance time (higher is better)

3  
4 10: Proportion patients attending unit with target admission numbers (higher is better)

5  
6 11: Proportion patients attending unit with target admission numbers and within estimated  
7 30 min travel time (higher is better)

8  
9  
10 12: Proportion patients attending unit with target admission numbers and within estimated  
11 45 min travel time (higher is better)

12  
13 13: Proportion patients attending unit with target admission numbers and within estimated  
14 60 min travel time (higher is better)

15  
16 Attempting to optimise on all 13 objectives simultaneously produces slow progress. Optimisation  
17 on fewer key objectives led to more rapid progress to solutions; these individual solution sets may  
18 then be combined and used as a seed for runs with larger numbers of objectives (providing a  
19 broader spread of solutions). This progressive extension of objectives is an established general  
20 methodology for genetic algorithms [2].  
21  
22

23  
24 The initial restricted objective runs (focussed on key conflicting priorities) used the following sets  
25 of objectives, each of which were aimed at focussing on key trade-offs:  
26

- 27  
28 • 1,2,3  
29  
30 • 1,4,5  
31  
32 • 7,10,11  
33  
34 • 8,10,12  
35  
36 • 4,5,7,10,11  
37  
38 • 4,5,8,10,12  
39  
40 • 1,2,4,5,7,10,11  
41  
42 • 1,2,4,5,8,10,12

43  
44 The advantage of the smaller objective sets is that the chance of Pareto dominance is greater (see  
45 section 3.1), leading to greater selection pressures in the algorithm. As an example when starting  
46 with a random population of 10,000 solutions the proportion of solutions in the first generation (the  
47 randomly chosen generation) that were on the Pareto Front were as follows:  
48

49  
50 All objectives: Mean 3,295 solutions on Pareto Front (SD =115, n=5)

51  
52 3 Objectives (8,10,12): Mean 49 solutions on Pareto Front (SD =7, n=5)

53  
54 Solutions identified from restricted objective runs were combined with solutions identified with  
55 runs based on all objectives and were combined into a single Pareto Front. This was used as a seed  
56 population for a run based on all objectives.  
57  
58  
59  
60

## 4 Genetic algorithms

Genetic algorithms manage a population of individuals encoded as vectors through a given number of generations. At each generation, 'good' parents are selected from the population according to their fitness (any measure of superiority over other potential parents). Parents are then combined, using a cross-over operator, to create children which are finally mutated. Genetic algorithms differ in the parent selection process, in the cross-over and mutation processes, and in the way the population is archived.

### 4.1 Representation

Solutions are coded as binary string of genes with either 1 for an open location or 0 for closed. For instance, 001011 would be six genes that represent hospitals 3, 5 and 6 being open and 1, 2 and 4 being closed. In this study, vectors represent the 127 hospitals (SSNAP acute admitting stroke units).

### 4.2 Selection

The selection operator chooses a part of the population to become parents. The better individuals in terms of objective values are more likely to become parents. The selection probability can be proportionate to fitness by roulette-wheel sampling[3] or stochastic universal sampling[4]. The sigma scaling method normalises the fitness by its variance in the population, so that the individuals with the highest fitness always have a higher probability than others to produce children. However, these approaches focus on exploitation of existing population rather than exploration of the decision space and they can lead to premature convergence.

Other selection methods rely on ranking rather than fitness value. With ranking selection, individuals are ranked according to their fitness and their probability to become parents is function of their rank[5]. Similarly, the tournament selection creates random pairs of individuals and keeps the one with the highest fitness value with a given probability[3]. Such methods allow the algorithm to keep some individuals with low fitness values (with the advantage of keeping a broader gene pool).

Finally, the Boltzmann selection[6] controls the selection rate via a temperature. At the beginning, all individuals have a similar probability to be selected. As the temperature decreases, the selection focusses on high-fitness individuals.

### 4.3 Cross-over

The cross-over is the process which exchanges genes from parents to create new children. The simplest option is the single-point cross-over which selects one locus and exchanges the blocks of parents before and after that locus. For instance, a crossover at point five would perform the following:

Parent A: 1 1 1 1 1 1

Parent B: 0 0 0 0 0 0

1  
2 Child A: = 1 1 1 1 0 0

3  
4 Child B: 0 0 0 0 1 1

5  
6 The choice of the single-point location can be made by a uniform distribution. In the case of binary  
7 vectors, the single-point cross-over is less likely to exchange the endpoints of vectors [2]. To reduce  
8 this effect, the cross-over can rely on two or more exchange points.  
9

## 10 11 12 **4.4 Mutation**

13  
14 Mutation changes the gene value of each locus, with a very small probability for each individual  
15 each generation. According to [7], the mutation process avoids the loss of diversity in the  
16 population.  
17

## 18 19 20 **4.5 Archive**

21  
22 Genetic algorithms also vary by the way solutions are archived and if the population size is  
23 variable. The simple option is to keep only children. However, it assumes that children are better  
24 than parents which are lost. Several methods build an archive which is union of parents and  
25 children. If the population size is variable, an option is to keep the Pareto Front of this archive.  
26 However, the size of this Pareto Front can increase dramatically, in particular with many objective  
27 functions. Then, individuals from the archive are ranked, based on their Pareto dominance and  
28 another metric. NSGA-II [8] and SPEA2 [9] both rank individuals by combining dominance and  
29 spread metric in order to maximise population diversity.  
30  
31  
32

## 33 34 35 **4.6 The NSGA-II method**

36  
37 In NSGA-II [8] the archive and the new population are merged and all individuals are ranked  
38 according to a two-step mechanism. In the first step, the merged population is split into layers of  
39 non-dominated fronts, the first layer being the Pareto Front (the second layer being the next Pareto  
40 Front after removal of the first layer). In the second step, the spread of the population is measured  
41 by the crowding distance which gives the distance from an individual to its nearest neighbour. To  
42 keep the size of the population constant, a given number of individuals is selected from the merged  
43 population, preferably from the upper layers and with the largest crowding distance.  
44  
45  
46

47  
48 NSGA-II has the advantage to keep not only optimal solutions but also near-optimal solutions in  
49 lower layers. However, to do so, the population must be large enough. The second advantage is to  
50 provide a diverse population in terms of score values, thanks to the crowding distance ranking.  
51

52  
53 The NSGA-II was chosen for this study after a pilot comparison with SPEA2[9], MOEAD[10], and  
54 HypE[11] which showed that NSGA-II provided similar objective performances with a more  
55 diverse population.  
56

## 57 58 59 **4.7 Convergence indicator**

60  
Population diversity can be monitored using average Hamming distance. The Hamming distance  
between any two solutions is the proportion of genes that are different. Average Hamming distance



1  
2 is the mean Hamming distances for all pairwise comparisons in the population (after first Pareto  
3 Front selection).  
4

## 5 6 7 **4.8 Description of our genetic algorithm**

8 The code contains a bespoke implementation of a genetic algorithm, based on NSGA-II[8]. Our  
9 method evolves solutions based on multiple objectives, but without any weighting of objectives. In  
10 each generation, the Pareto Front of non-dominated solutions is identified. Larger populations may  
11 be selected by picking subsequent Pareto Fronts (re-evaluation the Pareto Front after removal of the  
12 previous Pareto Front identified). The population size is maintained in the interval  $[P_{min}; P_{max}]$ .  
13  
14  
15

16 The steps of the algorithm are:

- 17  
18 1) Identify which combination of objectives to use for selection in algorithm (may be from 2  
19 objectives to all objectives).  
20
- 21  
22 2) Set up initial population of solutions (a typical starting population is 10,000 solutions).  
23
  - 24 i) Randomly choose number of hospitals to open in each solution.
  - 25 ii) Randomly assign open hospitals.
  - 26 iii) A library of solutions may be imported instead of, or in addition to, a random  
27 population of solutions.
  - 28 iv) Non-unique solutions are removed.  
29
- 30  
31 3) Breed solutions:  
32
  - 33 i) Choose pairs of solutions at random from the population.  
34  
35 While NSGA-II selects parents with the tournament method based on weighted  
36 criteria, our method selects parents randomly to avoid weighting any objective.  
37  
38 ii) Select a single crossover point at random within the solution binary string.  
39  
40 iii) Apply the cross-over operator to produce children.  
41  
42 iv) Randomly mutate children with a probability per element of 0.002.  
43  
44 v) Combine parents and children into a new population.  
45  
46 vi) Remove non-unique solutions and any solutions where all hospitals are closed.  
47  
48  
49
- 50  
51 4) Calculate the performance of all solutions against the objectives used for selection.  
52
- 53  
54 5) Identify all non-dominated (Pareto Front) solutions  
55
  - 56 i) If the number of selected solutions is greater than the maximum permitted  
57 population size then reduce the number of solutions by either  
58  
59 (1) picking the required number of solutions at random, or  
60  
61 (2) pick two solutions at random and use tournament selection based on  
62 crowding distance

1  
2 ii) If the number of selected solutions is lower than the target population then remove  
3 the previously selected non-dominated solutions and repeat the Pareto selection until  
4 sufficient solutions have been identified.  
5

6  
7 6) Repeat steps 3-5 until the maximum number of generations is reached or the algorithm is  
8 stopped by another indicator:  
9

10 i) Stop the algorithm when there is a change of  $<0.001$  in average Hamming  
11 distance across 5 generations.  
12

13  
14 Note: The minimum and maximum number of solutions to pass on to the next generation may be  
15 the same number to keep solution size constant. Alternatively, a range of population size may be  
16 acceptable (e.g. a minimum number of 1,000 solutions may be chosen, but a maximum number of  
17 5,000 solutions may be permitted. In this case Pareto selection is repeated until at least 1,000  
18 solutions have been selected, but restriction on the number of solutions only occurs if the number of  
19 solutions chosen exceeds 5,000).  
20  
21

22  
23 The time taken to reach convergence depended on the the number of objectives in the Pareto Front.  
24 Typical populations sizes and run times were:  
25

- 26 • For 3-4 objectives: population sizes of 2,500 to 5,000 were used. Typical run time to  
27 convergence on a single core of a 2GHz processor was 48hrs.
- 28 • For 8-12 objectives: population sizes of 5,00 to 10,000 were used. Typical run time to  
29 convergence on a single core of a 2GHz processor was 4-7 days.  
30  
31  
32

33 Note: algorithms may be speeded up by restricting solutions to a smaller range of acceptable  
34 number of hospitals (strict filters may be introduced into the algorithm to remove unacceptable  
35 solutions before identifying the Pareto Front).  
36  
37  
38

## 39 5 References

- 40  
41  
42  
43 1 Zhou A, Qu B-Y, Li H, *et al.* Multiobjective evolutionary algorithms: A survey of the state of  
44 the art. *Swarm Evol Comput* 2011;1:32–49. doi:10.1016/j.swevo.2011.03.001  
45  
46 2 Mitchell M. An introduction to genetic algorithms. *Comput Math with Appl* 1996;32:133.  
47 doi:10.1016/S0898-1221(96)90227-8  
48  
49 3 Goldberg DE. *Genetic Algorithms in Search, Optimization, and Machine Learning*. 1989.  
50 doi:10.1007/s10589-009-9261-6  
51  
52 4 Baker JE. Reducing bias and inefficiency in the selection algorithm. *Proc Second Int Conf*  
53 *Genet Algorithms Genet algorithms their Appl* 1987;;14–21.  
54  
55 5 Baker JE. Adaptive selection methods for genetic algorithms. *Proc an Int Conf Genet*  
56 *Algorithms their Appl* 1985;;101–11.  
57  
58  
59  
60

- 1  
2  
3  
4  
5  
6  
7  
8  
9  
10  
11  
12  
13  
14  
15  
16  
17  
18  
19  
20  
21  
22  
23  
24  
25  
26  
27  
28  
29  
30  
31  
32  
33  
34  
35  
36  
37  
38  
39  
40  
41  
42  
43  
44  
45  
46  
47  
48  
49  
50  
51  
52  
53  
54  
55  
56  
57  
58  
59  
60
- 6 Maza MDA, Tidor B. An analysis of selection procedures with particular attention paid to proportional and Boltzmann selection. *Proc 5th Int Conf Genet Algorithms* 1993;:124–31.
- 7 Holland JH. *Adaptation in Natural and Artificial Systems: An introductory Analysis with Applications to Biology, Control and Artificial Intelligence*. 1975. doi:10.1137/1018105
- 8 Deb K, Pratap A, Agarwal S, et al. A fast and elitist multiobjective genetic algorithm: NSGA-II. *IEEE Trans Evol Comput* 2002;6:182–97. doi:10.1109/4235.996017
- 9 Zitzler E, Laumanns M, Thiele L. SPEA2: Improving the Strength Pareto Evolutionary Algorithm. *Evol Methods Des Optim Control with Appl to Ind Probl* 2001;:95–100. doi:10.1.1.28.7571
- 10 Zhang Q, Li H. MOEA/D: A multiobjective evolutionary algorithm based on decomposition. *IEEE Trans Evol Comput* 2007;11:712–31. doi:10.1109/TEVC.2007.892759
- 11 Bader J, Zitzler E. HypE: An Algorithm for Fast Hypervolume-Based Many-Objective Optimization. *Evol Comput* 2011;19:45–76. doi:10.1162/EVCO\_a\_00009

STROBE Statement—checklist of items that should be included in reports of observational studies

Please note: The document was written in an Open Office format and saved as a Word document. The page numbers may vary by 1 page depending on the system used to open or process the paper. I've added more detail to the 'Page No. to allow further identification.

|                           | Item No. | Recommendation                                                                                      | Page No.                   | Relevant text from manuscript                                                                                                                                                                                                    |
|---------------------------|----------|-----------------------------------------------------------------------------------------------------|----------------------------|----------------------------------------------------------------------------------------------------------------------------------------------------------------------------------------------------------------------------------|
| <b>Title and abstract</b> | 1        | (a) Indicate the study's design with a commonly used term in the title or the abstract              | 1 (Title)                  | Feasibility of a hyper-acute stroke unit model of care across England. A modelling analysis                                                                                                                                      |
|                           |          | (b) Provide in the abstract an informative and balanced summary of what was done and what was found | 3 (Abstract)               |                                                                                                                                                                                                                                  |
|                           |          |                                                                                                     | and<br>4 (Article Summary) |                                                                                                                                                                                                                                  |
| <b>Introduction</b>       |          |                                                                                                     |                            |                                                                                                                                                                                                                                  |
| Background/rationale      | 2        | Explain the scientific background and rationale for the investigation being reported                | 5 (Intro para 2)           | Guidelines recommend a minimum number of admissions to a HASU of 600 patients per year, and NHS England reconfiguration guidelines also suggest 'travel time should be ideally 30 minutes but no more than 60 minutes            |
| Objectives                | 3        | State specific objectives, including any prespecified hypotheses                                    | 5 (Intro para 3)           | We therefore sought to investigate the potential for meeting the dual objectives of all patients with acute stroke being admitted to a HASU of sufficient size (at least 600 acute stroke patients per year) and that unit being |

within 30 minutes travel time.

## Methods

|              |   |                                                                                                                                                                                                                                                                                                                                                                                                                                                                                                                                                                                                                                                                                              |                                                                                   |                                                                                                                                                                                                                                                                                                     |
|--------------|---|----------------------------------------------------------------------------------------------------------------------------------------------------------------------------------------------------------------------------------------------------------------------------------------------------------------------------------------------------------------------------------------------------------------------------------------------------------------------------------------------------------------------------------------------------------------------------------------------------------------------------------------------------------------------------------------------|-----------------------------------------------------------------------------------|-----------------------------------------------------------------------------------------------------------------------------------------------------------------------------------------------------------------------------------------------------------------------------------------------------|
| Study design | 4 | Present key elements of study design early in the paper                                                                                                                                                                                                                                                                                                                                                                                                                                                                                                                                                                                                                                      | 6 (Methods para 2)                                                                | The model predicts, for any configuration of HASUs, the travel times (fastest road travel time chosen, from home location of patient to hospital with the shortest estimated travel time), and the number of admissions to each HASU. A genetic algorithm was used to identify good configurations. |
| Setting      | 5 | Describe the setting, locations, and relevant dates, including periods of recruitment, exposure, follow-up, and data collection                                                                                                                                                                                                                                                                                                                                                                                                                                                                                                                                                              | 6 (Methods para 3)<br>Note: this is a modelling study using secondary data only.  | We included 238,887 patients coded with ischaemic or haemorrhagic stroke (ICD-10 I61, I63, I64) with an emergency admission over a three-year period (2013-2015). Stroke admission numbers were counts of admissions for each of 31,771 Lower Super Output Areas (LSOAs) in England.                |
| Participants | 6 | <p>(a) <i>Cohort study</i>—Give the eligibility criteria, and the sources and methods of selection of participants. Describe methods of follow-up</p> <p><i>Case-control study</i>—Give the eligibility criteria, and the sources and methods of case ascertainment and control selection. Give the rationale for the choice of cases and controls</p> <p><i>Cross-sectional study</i>—Give the eligibility criteria, and the sources and methods of selection of participants</p> <hr/> <p>(b) <i>Cohort study</i>—For matched studies, give matching criteria and number of exposed and unexposed</p> <p><i>Case-control study</i>—For matched studies, give matching criteria and the</p> | 6 (Methods para 3).<br>Note: this is a modelling study using secondary data only. | We included 238,887 patients coded with ischaemic or haemorrhagic stroke (ICD-10 I61, I63, I64) with an emergency admission over a three-year period (2013-2015). Stroke admission numbers were counts of admissions for each of 31,771 Lower Super Output Areas (LSOAs) in England.                |

1  
2  
3  
4  
5  
6  
7  
8  
9  
10  
11  
12  
13  
14  
15  
16  
17  
18  
19  
20  
21  
22  
23  
24  
25  
26  
27  
28  
29  
30  
31  
32  
33  
34  
35  
36  
37  
38  
39  
40  
41  
42  
43  
44  
45  
46  
47  
48  
49

---

number of controls per case

---

|           |   |                                                                                                                                          |                                                                                   |                                                                                                                                                                                                                                                                                                     |
|-----------|---|------------------------------------------------------------------------------------------------------------------------------------------|-----------------------------------------------------------------------------------|-----------------------------------------------------------------------------------------------------------------------------------------------------------------------------------------------------------------------------------------------------------------------------------------------------|
| Variables | 7 | Clearly define all outcomes, exposures, predictors, potential confounders, and effect modifiers. Give diagnostic criteria, if applicable | 6 (Methods Para 1).<br>Note: this is a modelling study using secondary data only. | The model predicts, for any configuration of HASUs, the travel times (fastest road travel time chosen, from home location of patient to hospital with the shortest estimated travel time), and the number of admissions to each HASU. A genetic algorithm was used to identify good configurations. |
|-----------|---|------------------------------------------------------------------------------------------------------------------------------------------|-----------------------------------------------------------------------------------|-----------------------------------------------------------------------------------------------------------------------------------------------------------------------------------------------------------------------------------------------------------------------------------------------------|

---

|                              |    |                                                                                                                                                                                      |                    |                                                                                                                                                                                                                                                                                                                                                                                                                                                                                                          |
|------------------------------|----|--------------------------------------------------------------------------------------------------------------------------------------------------------------------------------------|--------------------|----------------------------------------------------------------------------------------------------------------------------------------------------------------------------------------------------------------------------------------------------------------------------------------------------------------------------------------------------------------------------------------------------------------------------------------------------------------------------------------------------------|
| Data sources/<br>measurement | 8* | For each variable of interest, give sources of data and details of methods of assessment (measurement). Describe comparability of assessment methods if there is more than one group | 6 (Methods para 3) | No individual patient level data was accessed: counts of admissions per LSOA were extracted from Hospital Episode Statistics (HES; <a href="http://www.hscic.gov.uk/hes">http://www.hscic.gov.uk/hes</a> ) with access to national HES data managed through Lightfoot Solutions ( <a href="http://www.lightfootsolutions.com/">http://www.lightfootsolutions.com/</a> ). Estimated fastest road travel times were obtained from a geographic information system (Maptitude, with MP-MileCharter add-in). |
|------------------------------|----|--------------------------------------------------------------------------------------------------------------------------------------------------------------------------------------|--------------------|----------------------------------------------------------------------------------------------------------------------------------------------------------------------------------------------------------------------------------------------------------------------------------------------------------------------------------------------------------------------------------------------------------------------------------------------------------------------------------------------------------|

---

|      |   |                                                           |                                                           |  |
|------|---|-----------------------------------------------------------|-----------------------------------------------------------|--|
| Bias | 9 | Describe any efforts to address potential sources of bias | NA (all confirmed stroke admissions included in analysis) |  |
|------|---|-----------------------------------------------------------|-----------------------------------------------------------|--|

---

|            |    |                                           |                                                                                                |  |
|------------|----|-------------------------------------------|------------------------------------------------------------------------------------------------|--|
| Study size | 10 | Explain how the study size was arrived at | No sampling. All patients with confirmed stroke admitted in England over a 3 year period used. |  |
|------------|----|-------------------------------------------|------------------------------------------------------------------------------------------------|--|

---

Continued on next page

|                        |     |                                                                                                                              |                                                                                                                         |                                                                                                                                                                                                                                                                                                                                                                                                                                      |
|------------------------|-----|------------------------------------------------------------------------------------------------------------------------------|-------------------------------------------------------------------------------------------------------------------------|--------------------------------------------------------------------------------------------------------------------------------------------------------------------------------------------------------------------------------------------------------------------------------------------------------------------------------------------------------------------------------------------------------------------------------------|
| Quantitative variables | 11  | Explain how quantitative variables were handled in the analyses. If applicable, describe which groupings were chosen and why | Not applicable to this modelling study                                                                                  |                                                                                                                                                                                                                                                                                                                                                                                                                                      |
| Statistical methods    | 12  | (a) Describe all statistical methods, including those used to control for confounding                                        | Not applicable to this modelling study                                                                                  |                                                                                                                                                                                                                                                                                                                                                                                                                                      |
|                        |     | (b) Describe any methods used to examine subgroups and interactions                                                          | No subgroups                                                                                                            |                                                                                                                                                                                                                                                                                                                                                                                                                                      |
|                        |     | (c) Explain how missing data were addressed                                                                                  | No missing data by definition of inclusions (all HES episodes with a primary diagnosis of stroke)                       |                                                                                                                                                                                                                                                                                                                                                                                                                                      |
|                        |     | (d) <i>Cohort study</i> —If applicable, explain how loss to follow-up was addressed                                          | Not applicable: No follow up (modelling study only)                                                                     |                                                                                                                                                                                                                                                                                                                                                                                                                                      |
|                        |     | <i>Case-control study</i> —If applicable, explain how matching of cases and controls was addressed                           |                                                                                                                         |                                                                                                                                                                                                                                                                                                                                                                                                                                      |
|                        |     | <i>Cross-sectional study</i> —If applicable, describe analytical methods taking account of sampling strategy                 |                                                                                                                         |                                                                                                                                                                                                                                                                                                                                                                                                                                      |
|                        |     | (e) Describe any sensitivity analyses                                                                                        | Page 9 (Discussion Para 3): discussion of potential impact of ageing population (but not a formal sensitivity analysis) | With an ageing population, however, we anticipate a steady increase in admissions to hospital with disabling stroke despite better preventative care, particularly in stroke related to atrial fibrillation[27]. Although such forecasting is imprecise, a potential increase in stroke incidence and hospital admissions could be driven by a predicted 54% increase in the population of England aged 75 or over the next 15 years |
| <b>Results</b>         |     |                                                                                                                              |                                                                                                                         |                                                                                                                                                                                                                                                                                                                                                                                                                                      |
| Participants           | 13* | (a) Report numbers of individuals at each stage of study—eg numbers potentially eligible, examined                           | Page 6                                                                                                                  | We included 238,887 patients                                                                                                                                                                                                                                                                                                                                                                                                         |

|                  |     |                                                                                                                                                                                                              |                                                                                   |                                                                                                                                                                   |
|------------------|-----|--------------------------------------------------------------------------------------------------------------------------------------------------------------------------------------------------------------|-----------------------------------------------------------------------------------|-------------------------------------------------------------------------------------------------------------------------------------------------------------------|
|                  |     | for eligibility, confirmed eligible, included in the study, completing follow-up, and analysed                                                                                                               | (Methods para 2)                                                                  | coded with ischaemic or haemorrhagic stroke (ICD-10 I61, I63, I64) with an emergency admission over a three-year period (2013-2015).                              |
|                  |     | (b) Give reasons for non-participation at each stage                                                                                                                                                         | Not applicable                                                                    |                                                                                                                                                                   |
|                  |     | (c) Consider use of a flow diagram                                                                                                                                                                           | Not applicable as not a trial                                                     |                                                                                                                                                                   |
| Descriptive data | 14* | (a) Give characteristics of study participants (eg demographic, clinical, social) and information on exposures and potential confounders                                                                     | Not applicable as modelling study used all emergency stroke admissions in England |                                                                                                                                                                   |
|                  |     | (b) Indicate number of participants with missing data for each variable of interest                                                                                                                          | Page 6 (Methods para 2)                                                           | We included 238,887 patients coded with ischaemic or haemorrhagic stroke (ICD-10 I61, I63, I64) with an emergency admission over a three-year period (2013-2015). |
|                  |     | (c) Cohort study—Summarise follow-up time (eg, average and total amount)                                                                                                                                     | Not applicable;e: no follow up                                                    |                                                                                                                                                                   |
| Outcome data     | 15* | Cohort study—Report numbers of outcome events or summary measures over time                                                                                                                                  | Not applicable; not a trial with outcomes                                         |                                                                                                                                                                   |
|                  |     | Case-control study—Report numbers in each exposure category, or summary measures of exposure                                                                                                                 |                                                                                   |                                                                                                                                                                   |
|                  |     | Cross-sectional study—Report numbers of outcome events or summary measures                                                                                                                                   |                                                                                   |                                                                                                                                                                   |
| Main results     | 16  | (a) Give unadjusted estimates and, if applicable, confounder-adjusted estimates and their precision (eg, 95% confidence interval). Make clear which confounders were adjusted for and why they were included | Not applicable; not using sampling                                                |                                                                                                                                                                   |
|                  |     | (b) Report category boundaries when continuous variables were categorized                                                                                                                                    | Not applicable                                                                    |                                                                                                                                                                   |
|                  |     | (c) If relevant, consider translating estimates of relative risk into absolute risk for a meaningful time period                                                                                             | Not applicable                                                                    |                                                                                                                                                                   |



1  
2  
3  
4  
5  
6  
7  
8  
9  
10  
11  
12  
13  
14  
15  
16  
17  
18  
19  
20  
21  
22  
23  
24  
25  
26  
27  
28  
29  
30  
31  
32  
33  
34  
35  
36  
37  
38  
39  
40  
41  
42  
43  
44  
45  
46  
47  
48  
49

Continued on next page

For peer review only

1  
2  
3  
4  
5  
6  
7  
8  
9  
10  
11  
12  
13  
14  
15  
16  
17  
18  
19  
20  
21  
22  
23  
24  
25  
26  
27  
28  
29  
30  
31  
32  
33  
34  
35  
36  
37  
38  
39  
40  
41  
42  
43  
44  
45  
46  
47  
48  
49

|                   |    |                                                                                                |                                                                                                   |                                                                                                                                                                                                                                                                                                                                                                                                                                                                                                                                                                                                                                                                                                                                                                      |
|-------------------|----|------------------------------------------------------------------------------------------------|---------------------------------------------------------------------------------------------------|----------------------------------------------------------------------------------------------------------------------------------------------------------------------------------------------------------------------------------------------------------------------------------------------------------------------------------------------------------------------------------------------------------------------------------------------------------------------------------------------------------------------------------------------------------------------------------------------------------------------------------------------------------------------------------------------------------------------------------------------------------------------|
| Other analyses    | 17 | Report other analyses done—eg analyses of subgroups and interactions, and sensitivity analyses | Page 7 (Results para 2 et seq). Analysis is on predicted travel times and admissions to hospitals | With an increasing number of HASUs, average and maximum road travel times reduce....                                                                                                                                                                                                                                                                                                                                                                                                                                                                                                                                                                                                                                                                                 |
| <b>Discussion</b> |    |                                                                                                |                                                                                                   |                                                                                                                                                                                                                                                                                                                                                                                                                                                                                                                                                                                                                                                                                                                                                                      |
| Key results       | 18 | Summarise key results with reference to study objectives                                       | Page 8 (Discussion para 2)                                                                        | Our modelling of national configurations of HASUs, designed to replicate the population benefits from centralisation of acute stroke services, has shown the feasibility but also the compromises necessary to maximise these benefits. Currently just over half (56%) of patients with acute stroke are admitted to a stroke unit with at least 600 admissions per year[2], and NHS England proposes to increase this proportion through centralisation in fewer, larger units[14]. These HASUs would have staffing levels and competencies as specified in national standards[15,16], and provide intensive (level 2) nursing and medical care for the initial 72 hours after onset (on average) before repatriation of the patient once medically stable to local |

step-down services for ongoing acute care and rehabilitation. By reducing from the current 127 acute sites to between 75-85 HASUs, our centralised HASU model predicts it is possible for all stroke patients to attend a unit of sufficient size, but with a reduction in the proportion of patients within 30 minutes travel from the current 90% to 80-82%, and with 95% and 99% of patients within 45 and 60 minutes travel respectively.

|                |                                                                                                                                                                               |                            |                                                                                                                                                                                                                                                                    |
|----------------|-------------------------------------------------------------------------------------------------------------------------------------------------------------------------------|----------------------------|--------------------------------------------------------------------------------------------------------------------------------------------------------------------------------------------------------------------------------------------------------------------|
| Limitations    | 19 Discuss limitations of the study, taking into account sources of potential bias or imprecision. Discuss both direction and magnitude of any potential bias                 | Page 9 (Discussion para 3) | In constructing our model, we have assumed all patients will be taken to their closest HASU. If this is not the case (such as decisions being made instead on organisational boundaries) then some inaccuracy of the model around those boundaries is expected.... |
| Interpretation | 20 Give a cautious overall interpretation of results considering objectives, limitations, multiplicity of analyses, results from similar studies, and other relevant evidence | Page 10 (Conclusion)       | A policy of centralising acute stroke services across England in 75-85 HASUs could realistically achieve 80-85% of patients attending an acute unit of sufficient size within 30 minutes travel time (with 97% and 98%                                             |

1  
2  
3  
4  
5  
6  
7  
8  
9  
10  
11  
12  
13  
14  
15  
16  
17  
18  
19  
20  
21  
22  
23  
24  
25  
26  
27  
28  
29  
30  
31  
32  
33  
34  
35  
36  
37  
38  
39  
40  
41  
42  
43  
44  
45  
46  
47  
48  
49

For peer review only

being within 45 and 60 minutes travel respectively), and with no unit larger than 2,000 stroke admissions per year. Though centralisation could offer significant advantages to the large majority of patients, a small minority (2-4% of the population) would be significantly adversely affected by centralisation, and planning for this minority will inevitably involve compromise between the recommended ideal institutional size and travel times.

---

|                  |    |                                                                       |                                                                            |
|------------------|----|-----------------------------------------------------------------------|----------------------------------------------------------------------------|
| Generalisability | 21 | Discuss the generalisability (external validity) of the study results | Not applicable, as not trying to extrapolate from trial to full population |
|------------------|----|-----------------------------------------------------------------------|----------------------------------------------------------------------------|

---

**Other information**

---

|         |    |                                                                                                                                                               |                            |                                                                                                                                                                                                                                                                                                                                                                  |
|---------|----|---------------------------------------------------------------------------------------------------------------------------------------------------------------|----------------------------|------------------------------------------------------------------------------------------------------------------------------------------------------------------------------------------------------------------------------------------------------------------------------------------------------------------------------------------------------------------|
| Funding | 22 | Give the source of funding and the role of the funders for the present study and, if applicable, for the original study on which the present article is based | Page 12 (Acknowledgements) | This study was funded by the National Institute of Health Research (NIHR) Collaboration for Leadership in Applied Health Research and Care for the South West Peninsula. The views and opinions expressed in this paper are those of the authors, and not necessarily those of the NHS, the National Institute for Health Research, or the Department of Health. |
|---------|----|---------------------------------------------------------------------------------------------------------------------------------------------------------------|----------------------------|------------------------------------------------------------------------------------------------------------------------------------------------------------------------------------------------------------------------------------------------------------------------------------------------------------------------------------------------------------------|

---

1  
2  
3  
4  
5  
6 \*Give information separately for cases and controls in case-control studies and, if applicable, for exposed and unexposed groups in cohort and cross-sectional studies.  
7  
8  
9

10 **Note:** An Explanation and Elaboration article discusses each checklist item and gives methodological background and published examples of transparent reporting. The STROBE  
11 checklist is best used in conjunction with this article (freely available on the Web sites of PLoS Medicine at <http://www.plosmedicine.org/>, Annals of Internal Medicine at  
12 <http://www.annals.org/>, and Epidemiology at <http://www.epidem.com/>). Information on the STROBE Initiative is available at [www.strobe-statement.org](http://www.strobe-statement.org).  
13  
14  
15  
16  
17  
18  
19  
20  
21  
22  
23  
24  
25  
26  
27  
28  
29  
30  
31  
32  
33  
34  
35  
36  
37  
38  
39  
40  
41  
42  
43  
44  
45  
46  
47  
48  
49
